# Supplementary material
Source: publisher figshare collection journal article supplement (https://acs.figshare.com/ndownloader/files/13003907)
Supplement: Supplementary file 1 [file 13003907]

# Supporting Information

## Intramolecular Umpolung allylation of Imines

Miao Zhan,<sup>‡</sup> Xiang Pu,<sup>‡</sup> Bin He, Dawen Niu, and Xia Zhang\*

Department of Emergency, State Key Laboratory of Biotherapy, West China Hospital, Sichuan University, and  
Collaborative Innovation Center for Biotherapy, Chengdu 610041, China

### Table of Contents

|                                                          |                |
|----------------------------------------------------------|----------------|
| <b>1. General Information</b>                            | <b>S2-S3</b>   |
| <b>2. Characterization Data of Allyl Carbonates</b>      | <b>S4-S11</b>  |
| <b>3. Intramolecular Allylation of Imines (Scheme 2)</b> | <b>S12-S23</b> |
| <b>4. NMR Spectra</b>                                    | <b>S24-S53</b> |
| <b>5. References</b>                                     | <b>S54</b>     |

## General Information

Anhydrous solvents [tetrahydrofuran (THF) and dichloromethane (DCM)] were purchased from Adamas or Energy Chemicals, and used as received. Tricyclohexyl phosphine (PCy<sub>3</sub>) was purchased from Adamas and used as received. PdCl<sub>2</sub>·(CH<sub>3</sub>CN)<sub>2</sub>, PdCl<sub>2</sub>, [PdCl(allyl)]<sub>2</sub> were purchased from Energy Chemicals and used as received. DBU (Energy Chemicals), TBD (Sigma), Et<sub>3</sub>N (Energy Chemicals), LiO<sup>t</sup>Bu (Aladdin), NaO<sup>t</sup>Bu (Sigma), LiHMDS (Sigma, solid), NaHMDS (Sigma or TCI, solid), KHMDS (Sigma, solid) were used as received. 9*H*-fluoren-9-amine hydrochloride salt was purchased from TCI and used as received. *N*-fluorenyl imine and allylic carbonates used in this work were prepared according to literature procedures. NMR yields were determined by using 2-methyl naphthalene as an internal standard.

## General Analytical Information

All new compounds were characterized by NMR spectroscopy and high-resolution mass spectroscopy (HRMS). NMR spectra were recorded on a Bruker AMX 400 spectrometer and were calibrated using TMS or residual deuterated solvent as an internal reference (CDCl<sub>3</sub>: 7.26 ppm for <sup>1</sup>H NMR and 77.16 ppm for <sup>13</sup>C NMR). HRMS spectra were recorded on a Shimadzu LCMS-IT-TOF.

## General Procedures for Intramolecular Umpolung Allylation of Imines

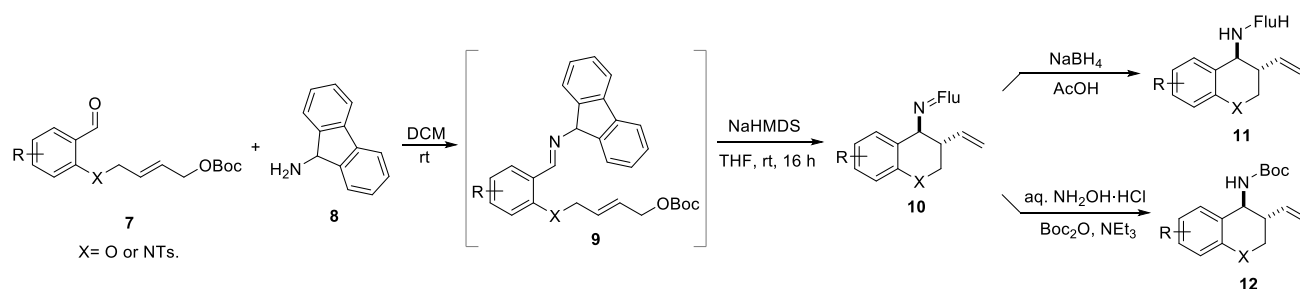

### General Reaction Procedure A:

A screw-capped vial containing aldehyde **7** (0.50 mmol) and 9*H*-fluoren-9-amine **8** (0.50 mmol) in dry CH<sub>2</sub>Cl<sub>2</sub> (5.0 mL) was stirred at 25 °C for 5 h. The mixture was concentrated to give the corresponding *N*-fluorenyl imine **9** (without purification) and was transferred into a nitrogen-filled glove-box. Dry THF (6.0 mL) was added into the vial via a syringe, followed by NaHMDS (96 mg, 0.53 mmol, 1.05 equiv). The vial was sealed with a cap containing a PTFE septum, removed from the glove box, and kept at 25 °C for 16 h. A small aliquot of the reaction solution was concentrated, diluted with CDCl<sub>3</sub>, and taken a <sup>1</sup>H NMR spectrum to determine the dr of **10**.

### General Reaction Procedure B:

A screw-capped vial containing aldehyde **7** (0.50 mmol) and 9*H*-fluoren-9-amine **8** (0.50 mmol) in dry CH<sub>2</sub>Cl<sub>2</sub> (5.0 mL) was stirred at 25 °C for 5 h. The mixture was concentrated to give the corresponding *N*-fluorenyl imine **9** (without purification) and was transferred into the glove-box. PdCl<sub>2</sub> (6 mol %), PCy<sub>3</sub> (24 mol %) and THF (6.0 mL) were added into the vial, followed by NaHMDS (1.05 equiv). The vial was sealed

with a cap containing a PTFE septum, removed from the glove box, and kept at 25 °C for 16 h. A small aliquot of the reaction solution was concentrated, diluted with CDCl<sub>3</sub>, and taken a <sup>1</sup>H NMR spectrum to determine the dr of **10**.

#### **General Workup Procedure A:**

At the end of the reaction, the mixture was concentrated, and CH<sub>2</sub>Cl<sub>2</sub> (3 mL) was added, followed by NaBH<sub>4</sub> (1.5 mmol, 57 mg), and cooled in an ice water bath. AcOH (10 mmol, 0.6 mL) was added slowly for at least 15 minutes while the reaction mixture was rapidly stirred (**CAUTION**: gas evolution). The resulting mixture was warmed to room temperature, and stirred for 1-2 h. The reaction mixture was then cooled in an ice-water bath, and NaOH (10% aq., 5 mL) was added slowly while the reaction mixture was rapidly stirred. The reaction mixture was warmed to room temperature, and stirred for 30 min. The layers were separated, and the aqueous layer was extracted with CH<sub>2</sub>Cl<sub>2</sub> (5 mL) twice. The combined organic layers were washed with brine (5 mL), and dried over Na<sub>2</sub>SO<sub>4</sub>. The mixture was concentrated under reduced pressure and purified by flash chromatography to afford the product **11**.

#### **General Workup Procedure B:**

The mixture was concentrated and hydroxylamine hydrochloride (1.0 M in Ethanol/ H<sub>2</sub>O= 4/1, 2 mL) was added. The resulting mixture was left at room temperature until the imine product was fully consumed (TLC, ~5 h). The mixture was then extracted with Et<sub>2</sub>O (5 mL) to remove fluorenone. The aqueous layer was basified with saturated aq. Na<sub>2</sub>CO<sub>3</sub> to pH > 9, and extracted with CH<sub>2</sub>Cl<sub>2</sub> three times. To the combined organic layers were added Et<sub>3</sub>N (200 µL) and Boc<sub>2</sub>O (200 µL). The mixture was left at room temperature until full consumption of the primary amine, as indicated by TLC analysis. The mixture was concentrated and subjected to flash chromatography to give the corresponding carbamate **12**.

## Characterization Data of for Allyl Carbonates

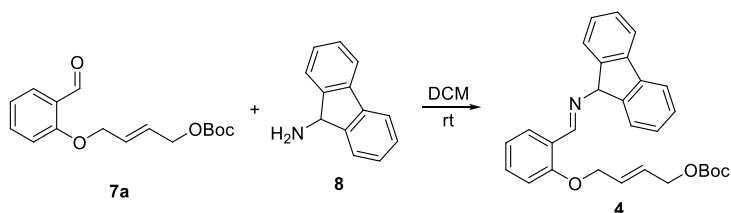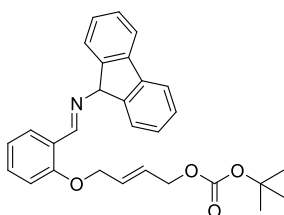

**(*E*)-4-(2-((*E*)-(9*H*-fluoren-9-ylimino)methyl)phenoxy)but-2-enyl tert-butyl carbonate (**4**).** *N*-fluorenyl imine **4** used in this manuscript was prepared following reported procedures.<sup>1</sup> Aldehyde **7a** and 9*H*-fluoren-9-amine **8** (1:1 mixture) in dry CH<sub>2</sub>Cl<sub>2</sub> (0.2 M) was stirred at 25 °C for 5 h. The mixture was concentrated to give the corresponding *N*-fluorenyl imine **4**, which is pure enough for further reactions. <sup>1</sup>H NMR (400 MHz, CDCl<sub>3</sub>) δ: 9.26 (s, 1H), 7.99 (dd, *J* = 7.7, 1.5 Hz, 1H), 7.76 (d, *J* = 7.4 Hz, 2H), 7.43 – 7.27 (m, 7H), 6.96 – 6.89 (m, 2H), 6.10 (dt, *J* = 15.8, 4.8 Hz, 1H), 6.01 (dt, *J* = 15.7, 5.5 Hz, 1H), 5.43 (s, 1H), 4.67 (d, *J* = 4.4 Hz, 2H), 4.64 (d, *J* = 5.6 Hz, 2H), 1.49 (s, 9H); <sup>13</sup>C NMR (101 MHz, CDCl<sub>3</sub>) δ: 159.4, 157.8, 153.4, 145.1, 141.2, 132.3, 129.4, 128.5, 128.2, 127.5, 127.1, 125.5, 124.9, 121.2, 120.2, 112.2, 82.5, 75.2, 68.0, 66.5, 27.9; HRMS (DART-TOF) calculated for C<sub>29</sub>H<sub>30</sub>NO<sub>4</sub><sup>+</sup> [M+H]<sup>+</sup> *m/z* 456.2169, found 456.2179.

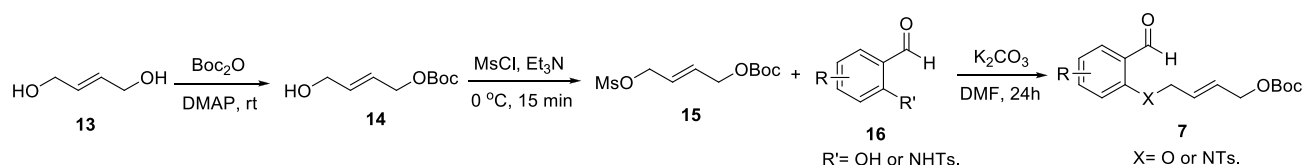

### **(*E*)-tert-butyl 4-hydroxybut-2-enyl carbonate (**14**).**

To a solution of (*E*)-but-2-ene-1,4-diol **13** (0.88 g, 10 mmol) in CH<sub>2</sub>Cl<sub>2</sub> (20 mL, 0.5 M), Boc<sub>2</sub>O (1.64 g, 7.5 mmol) and 4-dimethylaminopyridine (61 mg, 0.5 mmol) were added. The solution was stirred overnight. The solvent was removed by rotary evaporation and the reaction mixture was purified directly by flash column chromatography using petroleum ether/ethyl acetate (5/1) as eluents to afford the product **14** as a colorless oil (0.99 g, 5.3 mmol, 71%). <sup>1</sup>H NMR (400 MHz, CDCl<sub>3</sub>) δ: 5.96 (dtt, *J* = 15.5, 4.9, 1.0 Hz, 1H), 5.84 (dtt, *J* = 15.5, 6.0, 1.4 Hz, 1H), 4.57 (ddd, *J* = 5.8, 2.2, 1.1 Hz, 2H), 4.17 (d, *J* = 4.2 Hz, 2H), 1.49 (s, 9H); <sup>13</sup>C NMR (101 MHz, CDCl<sub>3</sub>) δ: 153.4, 134.1, 124.9, 82.4, 66.8, 62.8, 27.9; HRMS (DART-TOF) calculated for C<sub>9</sub>H<sub>16</sub>NaO<sub>4</sub><sup>+</sup> [M+Na]<sup>+</sup> *m/z* 211.0941, found 211.0947.

### **Allyl Carbonates (**7**).**

To a solution of 1.0 equiv of the (*E*)-*tert*-butyl 4-hydroxybut-2-enyl carbonate (**14**) in dry CH<sub>2</sub>Cl<sub>2</sub> (0.5 M), 1.2 equiv of Et<sub>3</sub>N was added, and cooled in an ice water bath. Then, 1.1 equiv of MsCl was added slowly, and stirred for 15 min. The mixture was quenched with saturated aq. NaHCO<sub>3</sub>, extracted with CH<sub>2</sub>Cl<sub>2</sub>, and dried over Na<sub>2</sub>SO<sub>4</sub>. The mixture was concentrated under reduced pressure and used without further purification. Then, 2.0 equiv of K<sub>2</sub>CO<sub>3</sub>, 0.90 equiv of compound **16** and DMF (0.5 M) were added. The mixture was stirred at 25 °C for 24 h. The mixture was diluted with EtOAc, washed with brine, and dried over Na<sub>2</sub>SO<sub>4</sub>. The mixture was concentrated under reduced pressure and purified by flash chromatography to afford the compound **7**.

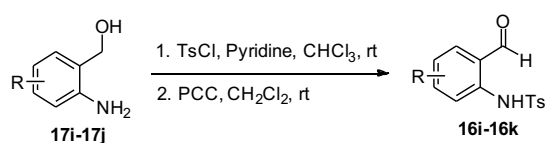

*N*-(2-formylphenyl)-4-methylbenzenesulfonamide derivatives (**16i-16k**) were prepared according to the literature procedure<sup>2</sup>.

A dry and nitrogen-flushed 100 mL flask, equipped with a magnetic stirring bar and a septum, was charged with a solution of 2-aminobenzyl alcohol **17** (10 mmol) in CHCl<sub>3</sub> (50 mL). TsCl (1.1 equiv) and pyridine (0.05 mL) were added, and the reaction mixture was stirred for 12 h at room temperature. Then, the solvent was removed in vacuo. Without purification, the crude product was dissolved in dichloromethane (25 mL) and PCC (1.2 equiv) was added. The reaction mixture was stirred for 4 h at room temperature and then filtered through celite followed by washing with CH<sub>2</sub>Cl<sub>2</sub> and evaporation in vacuo. Purification by flash chromatography furnished 2-tosylaminobenzaldehyde derivatives (**16i-16k**).

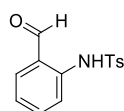

***N*-(2-formylphenyl)-4-methylbenzenesulfonamide (16i).** A dry and nitrogen-flushed 100 mL flask, equipped with a magnetic stirring bar and a septum, was charged with a solution of 2-aminobenzyl alcohol **17i** (1.23 g, 10 mmol) in CHCl<sub>3</sub> (50 mL). TsCl (2.09 g, 11 mmol) and pyridine (0.05 mL) were added, and the reaction mixture was stirred for 12 h at room temperature. Then, the solvent was removed in vacuo. Without purification, the crude product was dissolved in dichloromethane (25 mL) and PCC (2.59 g, 12 mmol) was added. The reaction mixture was stirred for 4 h at room temperature and then filtered through celite, followed by washing with CH<sub>2</sub>Cl<sub>2</sub> and evaporation in vacuo. Chromatographic purification on silica gel using petroleum ether/dichloromethane (1/3) as eluents furnished **16i** (2.48 g, 9 mmol, 90%). <sup>1</sup>H NMR (400 MHz, CDCl<sub>3</sub>) δ: 10.79 (s, 1H), 9.83 (s, 1H), 7.77 (d, *J* = 8.4 Hz, 2H), 7.68 (d, *J* = 8.4 Hz, 1H), 7.59 (dd, *J* = 7.7, 1.6 Hz, 1H), 7.51 (td, *J* = 8.0, 1.6 Hz, 1H), 7.24 (d, *J* = 8.1 Hz, 2H), 7.16 (td, *J* = 7.5, 0.9 Hz, 1H), 2.36 (s, 3H); <sup>13</sup>C NMR (101 MHz, CDCl<sub>3</sub>) δ: 195.1, 144.3, 140.0, 136.5, 136.2, 135.9, 129.9, 127.4, 123.1, 122.0, 117.8, 21.6;

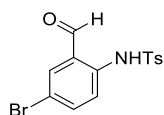

***N*-(4-bromo-2-formylphenyl)-4-methylbenzenesulfonamide (16j).** A dry and nitrogen-flushed 100 mL flask, equipped with a magnetic stirring bar and a septum, was charged with a solution of (2-amino-5-bromophenyl)methanol **17j** (2.02 g, 10 mmol) in  $\text{CHCl}_3$  (50 mL). TsCl (2.09 g, 11 mmol) and pyridine (0.05 mL) were added, and the reaction mixture was stirred for 12 h at room temperature. Then, the solvent was removed in vacuo. Without purification, the crude product was dissolved in dichloromethane (25 mL) and PCC (2.59 g, 12 mmol) was added. The reaction mixture was stirred for 4 h at room temperature and then filtered through celite followed by washing with  $\text{CH}_2\text{Cl}_2$  and evaporation in vacuo. Chromatographic purification on silica gel using petroleum ether/dichloromethane (1/3) as eluents furnished **16j** (3.01 g, 8.5 mmol, 85%).  $^1\text{H}$  NMR (400 MHz,  $\text{CDCl}_3$ )  $\delta$ : 10.64 (s, 1H), 9.76 (s, 1H), 7.75 (d,  $J$  = 8.3 Hz, 2H), 7.70 (d,  $J$  = 2.0 Hz, 1H), 7.64 – 7.56 (m, 2H), 7.25 (d,  $J$  = 7.7 Hz, 2H), 2.38 (s, 3H);  $^{13}\text{C}$  NMR (101 MHz,  $\text{CDCl}_3$ )  $\delta$ : 193.8, 144.6, 139.1, 138.7, 138.3, 136.2, 130.0, 127.4, 123.3, 119.9, 115.5, 21.7; HRMS (DART-TOF) calculated for  $\text{C}_{14}\text{H}_{12}\text{BrNNaO}_3\text{S}^+$   $[\text{M}+\text{Na}]^+$   $m/z$  375.9613, found 375.9640.

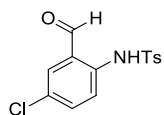

***N*-(4-chloro-2-formylphenyl)-4-methylbenzenesulfonamide (16k).** A dry and nitrogen-flushed 100 mL flask, equipped with a magnetic stirring bar and a septum, was charged with a solution of (2-amino-5-chlorophenyl)methanol **17k** (1.58 g, 10 mmol) in  $\text{CHCl}_3$  (50 mL). TsCl (2.09 g, 11 mmol) and pyridine (0.05 mL) were added, and the reaction mixture was stirred for 12 h at room temperature. Then, the solvent was removed in vacuo. Without purification, the crude product was dissolved in dichloromethane (25 mL) and PCC (2.59 g, 12 mmol) was added. The reaction mixture was stirred for 4 h at room temperature and then filtered through celite, followed by washing with  $\text{CH}_2\text{Cl}_2$  and evaporation in vacuo. Chromatographic purification on silica gel using petroleum ether/dichloromethane (1/3) as eluents furnished **16k** (2.51 g, 8.1 mmol, 81%).  $^1\text{H}$  NMR (400 MHz,  $\text{CDCl}_3$ )  $\delta$ : 10.62 (s, 1H), 9.77 (s, 1H), 7.75 (d,  $J$  = 8.4 Hz, 2H), 7.68 (d,  $J$  = 8.9 Hz, 1H), 7.56 (d,  $J$  = 2.5 Hz, 1H), 7.46 (dd,  $J$  = 8.9, 2.5 Hz, 1H), 7.25 (d,  $J$  = 9.0 Hz, 2H), 2.38 (s, 3H);  $^{13}\text{C}$  NMR (101 MHz,  $\text{CDCl}_3$ )  $\delta$ : 193.9, 144.6, 138.6, 136.2, 135.8, 135.3, 130.0, 128.5, 127.4, 123.0, 119.7, 21.7; HRMS (DART-TOF) calculated for  $\text{C}_{14}\text{H}_{12}\text{ClNNaO}_3\text{S}^+$   $[\text{M}+\text{Na}]^+$   $m/z$  332.0119, found 332.0083.

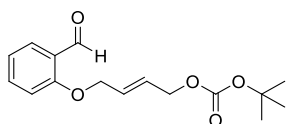

**(*E*)-tert-butyl 4-(2-formylphenoxy)but-2-enyl carbonate (7a).** To a solution of (*E*)-tert-butyl 4-hydroxybut-2-enyl carbonate **14** (188 mg, 1 mmol) in dry  $\text{CH}_2\text{Cl}_2$  (2 mL),  $\text{Et}_3\text{N}$  (121 mg, 1.2 mmol) was added, and cooled in an ice water bath. Then, MsCl (159 mg, 1.1 mmol) was added dropwise, and stirred for 15 min. The mixture was quenched with saturated aq.  $\text{NaHCO}_3$ , extracted with  $\text{CH}_2\text{Cl}_2$ , and dried over  $\text{Na}_2\text{SO}_4$ . The mixture was concentrated under reduced pressure and used without further purification. Then,  $\text{K}_2\text{CO}_3$

(276 mg, 2 mmol), 2-hydroxybenzaldehyde **16a** (110 mg, 0.9 mmol) and DMF (2 mL) were added. The mixture was stirred at 25 °C for 24 h. The mixture was diluted with EtOAc, washed with brine, and dried over Na<sub>2</sub>SO<sub>4</sub>. The mixture was concentrated under reduced pressure and purified by flash chromatography using petroleum ether/ethyl acetate (1/10) as eluents to afford **7a** (231 mg, 0.79 mmol, 79%, two steps). **<sup>1</sup>H NMR (400 MHz, CDCl<sub>3</sub>)** δ: 10.52 (s, 1H), 7.84 (dd, *J* = 7.7, 1.6 Hz, 1H), 7.53 (ddd, *J* = 8.7, 7.4, 1.8 Hz, 1H), 7.04 (t, *J* = 7.5 Hz, 1H), 6.96 (d, *J* = 8.4 Hz, 1H), 6.11 – 5.92 (m, 2H), 4.68 (d, *J* = 3.7 Hz, 2H), 4.62 (d, *J* = 4.3 Hz, 2H), 1.49 (s, 9H); **<sup>13</sup>C NMR (101 MHz, CDCl<sub>3</sub>)** δ: 189.8, 160.9, 153.3, 136.0, 128.7, 128.7, 127.6, 125.2, 121.1, 112.9, 82.6, 68.1, 66.4, 27.9; **HRMS (DART-TOF)** calculated for C<sub>16</sub>H<sub>20</sub>NaO<sub>5</sub><sup>+</sup> [M+Na]<sup>+</sup> *m/z* 315.1203, found 315.1209.

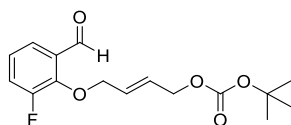

**(*E*)-tert-butyl 4-(2-fluoro-6-formylphenoxy)but-2-enyl carbonate (7b).** To a solution of (*E*)-tert-butyl 4-hydroxybut-2-enyl carbonate **14** (188 mg, 1 mmol) in dry CH<sub>2</sub>Cl<sub>2</sub> (2 mL), Et<sub>3</sub>N (121 mg, 1.2 mmol) was added, and cooled in an ice water bath. Then, MsCl (159 mg, 1.1 mmol) was added dropwise, and stirred for 15 min. The mixture was quenched with saturated aq. NaHCO<sub>3</sub>, extracted with CH<sub>2</sub>Cl<sub>2</sub>, and dried over Na<sub>2</sub>SO<sub>4</sub>. The mixture was concentrated under reduced pressure and used without further purification. Then, K<sub>2</sub>CO<sub>3</sub> (276 mg, 2 mmol), 3-fluoro-2-hydroxybenzaldehyde **16b** (126 mg, 0.9 mmol) and DMF (2 mL) were added. The mixture was stirred at 25 °C for 24 h. The mixture was diluted with EtOAc, washed with brine, and dried over Na<sub>2</sub>SO<sub>4</sub>. The mixture was concentrated under reduced pressure and purified by flash chromatography using petroleum ether/ethyl acetate (1/10) as eluents to afford **7b** (230 mg, 0.74 mmol, 74%, two steps). **<sup>1</sup>H NMR (400 MHz, CDCl<sub>3</sub>)** δ: 10.40 (d, *J* = 0.4 Hz, 1H), 7.63 – 7.59 (m, 1H), 7.33 (ddd, *J* = 11.6, 8.1, 1.6 Hz, 1H), 7.14 – 7.07 (m, 1H), 6.07 – 5.92 (m, 2H), 4.77 (d, *J* = 5.4 Hz, 2H), 4.59 (d, *J* = 5.6 Hz, 2H), 1.49 (s, 9H); **<sup>13</sup>C NMR (101 MHz, CDCl<sub>3</sub>)** δ: 189.0 (d, *J* = 3.3 Hz), 155.2 (d, *J* = 249.1 Hz), 153.3, 149.0 (d, *J* = 10.9 Hz), 130.6 (d, *J* = 2.0 Hz), 129.0, 128.6, 123.9 (d, *J* = 7.3 Hz), 123.6 (d, *J* = 3.3 Hz), 122.9 (d, *J* = 19.4 Hz), 82.5, 74.3 (d, *J* = 7.0 Hz), 66.2, 27.9; **<sup>19</sup>F NMR (376 MHz, CDCl<sub>3</sub>)** δ: -128.76; **HRMS (DART-TOF)** calculated for C<sub>16</sub>H<sub>19</sub>FNao<sub>5</sub><sup>+</sup> [M+Na]<sup>+</sup> *m/z* 333.1109, found 333.1115.

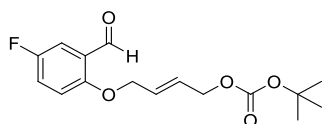

**(*E*)-tert-butyl 4-(4-fluoro-2-formylphenoxy)but-2-enyl carbonate (7c).** To a solution of (*E*)-tert-butyl 4-hydroxybut-2-enyl carbonate **14** (188 mg, 1 mmol) in dry CH<sub>2</sub>Cl<sub>2</sub> (2 mL), Et<sub>3</sub>N (121 mg, 1.2 mmol) was added, and cooled in an ice water bath. Then, MsCl (159 mg, 1.1 mmol) was added dropwise, and stirred for 15 min. The mixture was quenched with saturated aq. NaHCO<sub>3</sub>, extracted with CH<sub>2</sub>Cl<sub>2</sub>, and dried over Na<sub>2</sub>SO<sub>4</sub>. The mixture was concentrated under reduced pressure and used without further purification. Then, K<sub>2</sub>CO<sub>3</sub> (276 mg, 2 mmol), 5-fluoro-2-hydroxybenzaldehyde **16c** (126 mg, 0.9 mmol) and DMF (2 mL) were added. The mixture was stirred at 25 °C for 24 h. The mixture was diluted with EtOAc, washed with brine, and dried

over Na<sub>2</sub>SO<sub>4</sub>. The mixture was concentrated under reduced pressure and purified by flash chromatography using petroleum ether/ethyl acetate (1/10) as eluents to afford **7c** (239 mg, 0.77 mmol, 77%, two steps). **<sup>1</sup>H NMR (400 MHz, CDCl<sub>3</sub>)** δ: 10.45 (d, *J* = 3.1 Hz, 1H), 7.51 (dd, *J* = 8.2, 3.3 Hz, 1H), 7.23 (ddd, *J* = 9.1, 7.6, 3.3 Hz, 1H), 6.94 (dd, *J* = 9.1, 3.9 Hz, 1H), 6.07 – 5.93 (m, 2H), 4.66 (d, *J* = 3.6 Hz, 2H), 4.62 (d, *J* = 4.1 Hz, 2H), 1.49 (s, 9H); **<sup>13</sup>C NMR (101 MHz, CDCl<sub>3</sub>)** δ: 188.6 (d, *J* = 1.7 Hz), 157.2 (d, *J* = 242.8 Hz), 157.2 (d, *J* = 1.9 Hz), 153.3, 128.4, 128.0, 126.0 (d, *J* = 5.9 Hz), 122.5 (d, *J* = 24.0 Hz), 114.6 (d, *J* = 7.3 Hz), 114.3 (d, *J* = 23.5 Hz), 82.6, 68.8, 66.3, 27.9; **<sup>19</sup>F NMR (376 MHz, CDCl<sub>3</sub>)** δ: -122.06; **HRMS (DART-TOF)** calculated for C<sub>16</sub>H<sub>19</sub>FNaO<sub>5</sub><sup>+</sup> [*M*+Na]<sup>+</sup> *m/z* 333.1109, found 333.1115.

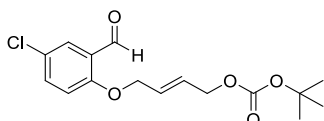

**(*E*)-tert-butyl 4-(4-chloro-2-formylphenoxy)but-2-enyl carbonate (7d).** To a solution of (*E*)-tert-butyl 4-hydroxybut-2-enyl carbonate **14** (188 mg, 1 mmol) in dry CH<sub>2</sub>Cl<sub>2</sub> (2 mL), Et<sub>3</sub>N (121 mg, 1.2 mmol) was added, and cooled in an ice water bath. Then, MsCl (159 mg, 1.1 mmol) was added dropwise, and stirred for 15 min. The mixture was quenched with saturated aq. NaHCO<sub>3</sub>, extracted with CH<sub>2</sub>Cl<sub>2</sub>, and dried over Na<sub>2</sub>SO<sub>4</sub>. The mixture was concentrated under reduced pressure and used without further purification. Then, K<sub>2</sub>CO<sub>3</sub> (276 mg, 2 mmol), 5-chloro-2-hydroxybenzaldehyde **16d** (141 mg, 0.9 mmol) and DMF (2 mL) were added. The mixture was stirred at 25 °C for 24 h. The mixture was diluted with EtOAc, washed with brine, and dried over Na<sub>2</sub>SO<sub>4</sub>. The mixture was concentrated under reduced pressure and purified by flash chromatography using petroleum ether/ethyl acetate (1/10) as eluents to afford **7d** (235 mg, 0.72 mmol, 72%, two steps). **<sup>1</sup>H NMR (400 MHz, CDCl<sub>3</sub>)** δ: 10.44 (s, 1H), 7.79 (d, *J* = 2.7 Hz, 1H), 7.47 (dd, *J* = 8.9, 2.8 Hz, 1H), 6.92 (d, *J* = 8.9 Hz, 1H), 6.07 – 5.94 (m, 2H), 4.66 (d, *J* = 3.4 Hz, 2H), 4.62 (dd, *J* = 4.6, 0.9 Hz, 2H), 1.49 (s, 9H); **<sup>13</sup>C NMR (101 MHz, CDCl<sub>3</sub>)** δ: 188.4, 159.3, 153.3, 135.4, 128.2, 128.1, 128.1, 126.9, 126.1, 114.6, 82.6, 68.5, 66.2, 27.9; **HRMS (DART-TOF)** calculated for C<sub>16</sub>H<sub>19</sub>ClNaO<sub>5</sub><sup>+</sup> [*M*+Na]<sup>+</sup> *m/z* 349.0813, found 349.0818.

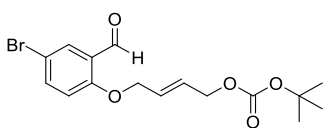

**(*E*)-4-(4-bromo-2-formylphenoxy)but-2-enyl tert-butyl carbonate (7e).** To a solution of (*E*)-tert-butyl 4-hydroxybut-2-enyl carbonate **14** (188 mg, 1 mmol) in dry CH<sub>2</sub>Cl<sub>2</sub> (2 mL), Et<sub>3</sub>N (121 mg, 1.2 mmol) was added, and cooled in an ice water bath. Then, MsCl (159 mg, 1.1 mmol) was added dropwise, and stirred for 15 min. The mixture was quenched with saturated aq. NaHCO<sub>3</sub>, extracted with CH<sub>2</sub>Cl<sub>2</sub>, and dried over Na<sub>2</sub>SO<sub>4</sub>. The mixture was concentrated under reduced pressure and used without further purification. Then, K<sub>2</sub>CO<sub>3</sub> (276 mg, 2 mmol), 5-bromo-2-hydroxybenzaldehyde **16e** (181 mg, 0.9 mmol) and DMF (2 mL) were added. The mixture was stirred at 25 °C for 24 h. The mixture was diluted with EtOAc, washed with brine, and dried over Na<sub>2</sub>SO<sub>4</sub>. The mixture was concentrated under reduced pressure and purified by flash chromatography using petroleum ether/ethyl acetate (1/10) as eluents to afford **7e** (263 mg, 0.71 mmol, 71%, two steps). **<sup>1</sup>H NMR (400 MHz, CDCl<sub>3</sub>)** δ: 10.42 (s, 1H), 7.93 (d, *J* = 2.6 Hz, 1H), 7.60 (dd, *J* = 8.9, 2.6 Hz, 1H), 6.87 (d, *J*



= 8.9 Hz, 1H), 6.06 – 5.94 (m, 2H), 4.66 (d,  $J$  = 3.3 Hz, 2H), 4.62 (d,  $J$  = 3.8 Hz, 2H), 1.49 (s, 9H);  $^{13}\text{C}$  NMR (101 MHz,  $\text{CDCl}_3$ )  $\delta$ : 188.3, 159.7, 153.3, 138.3, 131.3, 128.2, 128.1, 126.5, 115.0, 114.0, 82.6, 68.5, 66.2, 27.9; HRMS (DART-TOF) calculated for  $\text{C}_{16}\text{H}_{19}\text{BrNaO}_5^+$   $[\text{M}+\text{Na}]^+$   $m/z$  393.0308, found 393.0313.

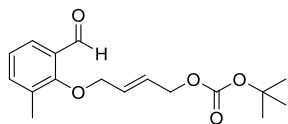

**(*E*)-tert-butyl 4-(2-formyl-6-methylphenoxy)but-2-enyl carbonate (7f).** To a solution of (*E*)-tert-butyl 4-hydroxybut-2-enyl carbonate **14** (188 mg, 1 mmol) in dry  $\text{CH}_2\text{Cl}_2$  (2 mL),  $\text{Et}_3\text{N}$  (121 mg, 1.2 mmol) was added, and cooled in an ice water bath. Then,  $\text{MsCl}$  (159 mg, 1.1 mmol) was added dropwise, and stirred for 15 min. The mixture was quenched with saturated aq.  $\text{NaHCO}_3$ , extracted with  $\text{CH}_2\text{Cl}_2$ , and dried over  $\text{Na}_2\text{SO}_4$ . The mixture was concentrated under reduced pressure and used without further purification. Then,  $\text{K}_2\text{CO}_3$  (276 mg, 2 mmol), 2-hydroxy-3-methylbenzaldehyde **16f** (123 mg, 0.9 mmol) and DMF (2 mL) were added. The mixture was stirred at 25 °C for 24 h. The mixture was diluted with EtOAc, washed with brine, and dried over  $\text{Na}_2\text{SO}_4$ . The mixture was concentrated under reduced pressure and purified by flash chromatography using petroleum ether/ethyl acetate (1/10) as eluents to afford **7f** (233 mg, 0.76 mmol, 76%, two steps).  $^1\text{H}$  NMR (400 MHz,  $\text{CDCl}_3$ )  $\delta$ : 10.35 (d,  $J$  = 0.4 Hz, 1H), 7.69 (dd,  $J$  = 7.7, 1.2 Hz, 1H), 7.45 (dd,  $J$  = 7.4, 0.8 Hz, 1H), 7.15 (t,  $J$  = 7.6 Hz, 1H), 6.11 – 5.95 (m, 2H), 4.62 (dd,  $J$  = 5.4, 0.8 Hz, 2H), 4.47 (dd,  $J$  = 5.1, 0.8 Hz, 2H), 2.33 (s, 3H), 1.50 (s, 9H);  $^{13}\text{C}$  NMR (101 MHz,  $\text{CDCl}_3$ )  $\delta$ : 190.4, 160.3, 153.4, 137.7, 132.5, 129.6, 129.1, 128.0, 126.7, 124.6, 82.5, 75.3, 66.4, 27.9, 16.0; HRMS (DART-TOF) calculated for  $\text{C}_{17}\text{H}_{22}\text{NaO}_5^+$   $[\text{M}+\text{Na}]^+$   $m/z$  329.1359, found 329.1370.

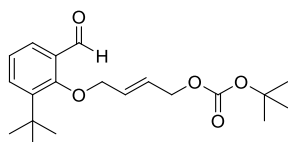

**(*E*)-tert-butyl 4-(2-tert-butyl-6-formylphenoxy)but-2-enyl carbonate (7g).** To a solution of (*E*)-tert-butyl 4-hydroxybut-2-enyl carbonate **14** (188 mg, 1 mmol) in dry  $\text{CH}_2\text{Cl}_2$  (2 mL),  $\text{Et}_3\text{N}$  (121 mg, 1.2 mmol) was added, and cooled in an ice water bath. Then,  $\text{MsCl}$  (159 mg, 1.1 mmol) was added dropwise, and stirred for 15 min. The mixture was quenched with saturated aq.  $\text{NaHCO}_3$ , extracted with  $\text{CH}_2\text{Cl}_2$ , and dried over  $\text{Na}_2\text{SO}_4$ . The mixture was concentrated under reduced pressure and used without further purification. Then,  $\text{K}_2\text{CO}_3$  (276 mg, 2 mmol), 3-(tert-butyl)-2-hydroxybenzaldehyde **16g** (160 mg, 0.9 mmol) and DMF (2 mL) were added. The mixture was stirred at 25 °C for 24 h. The mixture was diluted with EtOAc, washed with brine, and dried over  $\text{Na}_2\text{SO}_4$ . The mixture was concentrated under reduced pressure and purified by flash chromatography using petroleum ether/ethyl acetate (1/10) as eluents to afford **7g** (244 mg, 0.70 mmol, 70%, two steps).  $^1\text{H}$  NMR (400 MHz,  $\text{CDCl}_3$ )  $\delta$ : 10.27 (s, 1H), 7.71 (dd,  $J$  = 7.6, 1.7 Hz, 1H), 7.59 (dd,  $J$  = 7.8, 1.7 Hz, 1H), 7.16 (t,  $J$  = 7.6 Hz, 1H), 6.15 – 6.02 (m, 2H), 4.65 (d,  $J$  = 4.3 Hz, 2H), 4.51 (d,  $J$  = 3.0 Hz, 2H), 1.51 (s, 9H), 1.42 (s, 9H);  $^{13}\text{C}$  NMR (101 MHz,  $\text{CDCl}_3$ )  $\delta$ : 190.5, 161.7, 153.4, 144.0, 133.7, 130.2, 129.1, 127.9,

127.0, 124.2, 82.5, 78.2, 66.6, 35.3, 31.0, 27.9; **HRMS (DART-TOF)** calculated for  $C_{20}H_{28}NaO_5^+$   $[M+Na]^+$   $m/z$  371.1829, found 371.1836.

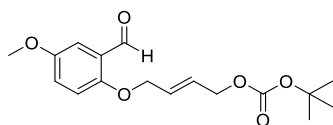

**(E)-tert-butyl 4-(2-formyl-4-methoxyphenoxy)but-2-enyl carbonate (7h).** To a solution of (*E*)-*tert*-butyl 4-hydroxybut-2-enyl carbonate **14** (188 mg, 1 mmol) in dry  $CH_2Cl_2$  (2 mL),  $Et_3N$  (121 mg, 1.2 mmol) was added, and cooled in an ice water bath. Then,  $MsCl$  (159 mg, 1.1 mmol) was added dropwise, and stirred for 15 min. The mixture was quenched with saturated aq.  $NaHCO_3$ , extracted with  $CH_2Cl_2$ , and dried over  $Na_2SO_4$ . The mixture was concentrated under reduced pressure and used without further purification. Then,  $K_2CO_3$  (276 mg, 2 mmol), 2-hydroxy-5-methoxybenzaldehyde **16h** (137 mg, 0.9 mmol) and DMF (2 mL) were added. The mixture was stirred at 25 °C for 24 h. The mixture was diluted with EtOAc, washed with brine, and dried over  $Na_2SO_4$ . The mixture was concentrated under reduced pressure and purified by flash chromatography using petroleum ether/ethyl acetate (1/10) as eluents to afford **7h** (229 mg, 0.71 mmol, 71%, two steps).  **$^1H$  NMR (400 MHz,  $CDCl_3$ )**  $\delta$ : 10.48 (s, 1H), 7.33 (d,  $J$  = 3.3 Hz, 1H), 7.11 (dd,  $J$  = 9.1, 3.3 Hz, 1H), 6.92 (d,  $J$  = 9.1 Hz, 1H), 6.08 – 5.92 (m, 2H), 4.64 – 4.59 (m, 4H), 3.80 (s, 3H), 1.49 (s, 9H);  **$^{13}C$  NMR (101 MHz,  $CDCl_3$ )**  $\delta$ : 189.5, 155.7, 154.0, 153.3, 129.0, 127.5, 125.5, 123.6, 114.9, 110.5, 82.5, 68.9, 66.4, 55.9, 27.9 ; **HRMS (DART-TOF)** calculated for  $C_{17}H_{22}NaO_6^+$   $[M+Na]^+$   $m/z$  345.1309, found 345.1312.

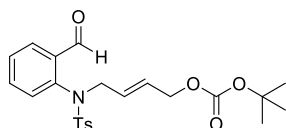

**(E)-tert-butyl 4-(N-(2-formylphenyl)-4-methylphenylsulfonamido)but-2-enyl carbonate (7i).** To a solution of (*E*)-*tert*-butyl 4-hydroxybut-2-enyl carbonate **14** (188 mg, 1 mmol) in dry  $CH_2Cl_2$  (2 mL),  $Et_3N$  (121 mg, 1.2 mmol) was added, and cooled in an ice water bath. Then,  $MsCl$  (159 mg, 1.1 mmol) was added dropwise, and stirred for 15 min. The mixture was quenched with saturated aq.  $NaHCO_3$ , extracted with  $CH_2Cl_2$ , and dried over  $Na_2SO_4$ . The mixture was concentrated under reduced pressure and used without further purification. Then,  $K_2CO_3$  (276 mg, 2 mmol), *N*-(2-formylphenyl)-4-methylbenzenesulfonamide **16i** (248 mg, 0.9 mmol) and DMF (2 mL) were added. The mixture was stirred at 25 °C for 24 h. The mixture was diluted with EtOAc, washed with brine, and dried over  $Na_2SO_4$ . The mixture was concentrated under reduced pressure and purified by flash chromatography using petroleum ether/ethyl acetate (1/15) as eluents to afford **7i** (303 mg, 0.68 mmol, 68%, two steps).  **$^1H$  NMR (400 MHz,  $CDCl_3$ )**  $\delta$ : 10.35 (s, 1H), 8.01 – 7.96 (m, 1H), 7.51 – 7.41 (m, 4H), 7.28 (d,  $J$  = 8.7 Hz, 2H), 6.74 – 6.69 (m, 1H), 5.73 (dt,  $J$  = 14.7, 6.7 Hz, 1H), 5.59 (dt,  $J$  = 15.5, 5.8 Hz, 1H), 4.61 – 4.47 (m, 1H), 4.38 (d,  $J$  = 5.6 Hz, 2H), 4.00 – 3.85 (m, 1H), 2.45 (s, 3H), 1.44 (s, 9H);  **$^{13}C$  NMR (101 MHz,  $CDCl_3$ )**  $\delta$ : 190.0, 153.1, 144.4, 141.3, 136.0, 134.5, 134.2, 129.9, 129.8, 128.8, 128.7, 128.1, 128.0, 127.9, 82.5, 66.0, 53.3, 27.8, 21.7; **HRMS (DART-TOF)** calculated for  $C_{23}H_{27}NNaO_6S^+$   $[M+Na]^+$   $m/z$  468.1451, found 468.1459.

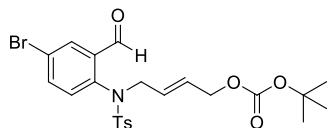

**(*E*)-4-(*N*-(4-bromo-2-formylphenyl)-4-methylphenylsulfonamido)but-2-enyl tert-butyl carbonate (**7j**).**

To a solution of (*E*)-tert-butyl 4-hydroxybut-2-enyl carbonate **14** (188 mg, 1 mmol) in dry CH<sub>2</sub>Cl<sub>2</sub> (2 mL), Et<sub>3</sub>N (121 mg, 1.2 mmol) was added, and cooled in an ice water bath. Then, MsCl (159 mg, 1.1 mmol) was added dropwise, and stirred for 15 min. The mixture was quenched with saturated aq. NaHCO<sub>3</sub>, extracted with CH<sub>2</sub>Cl<sub>2</sub>, and dried over Na<sub>2</sub>SO<sub>4</sub>. The mixture was concentrated under reduced pressure and used without further purification. Then, K<sub>2</sub>CO<sub>3</sub> (276 mg, 2 mmol), *N*-(4-bromo-2-formylphenyl)-4-methylbenzenesulfonamide **16j** (319 mg, 0.9 mmol) and DMF (2 mL) were added. The mixture was stirred at 25 °C for 24 h. The mixture was diluted with EtOAc, washed with brine, and dried over Na<sub>2</sub>SO<sub>4</sub>. The mixture was concentrated under reduced pressure and purified by flash chromatography using petroleum ether/ethyl acetate (1/15) as eluents to afford **7j** (351 mg, 0.67 mmol, 67%, two steps). <sup>1</sup>H NMR (400 MHz, CDCl<sub>3</sub>) δ: 10.27 (s, 1H), 8.09 (d, *J* = 2.4 Hz, 1H), 7.56 (dd, *J* = 8.5, 2.5 Hz, 1H), 7.47 (d, *J* = 8.3 Hz, 2H), 7.30 (d, *J* = 8.0 Hz, 2H), 6.57 (d, *J* = 8.5 Hz, 1H), 5.70 (dt, *J* = 14.5, 6.6 Hz, 1H), 5.59 (dt, *J* = 15.5, 5.6 Hz, 1H), 4.64 – 4.47 (m, 1H), 4.38 (d, *J* = 5.4 Hz, 2H), 3.96 – 3.77 (m, 1H), 2.45 (s, 3H), 1.44 (s, 9H); <sup>13</sup>C NMR (101 MHz, CDCl<sub>3</sub>) δ: 188.5, 153.1, 144.7, 140.1, 137.4, 137.0, 134.1, 131.8, 130.4, 130.0, 129.7, 128.0, 127.5, 123.2, 82.6, 65.9, 53.1, 27.8, 21.8; HRMS (DART-TOF) calculated for C<sub>23</sub>H<sub>26</sub>BrNNaO<sub>6</sub>S<sup>+</sup> [M+Na]<sup>+</sup> *m/z* 546.0556, found 546.0569.

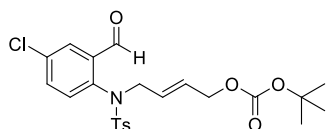

**(*E*)-tert-butyl 4-(*N*-(4-chloro-2-formylphenyl)-4-methylphenylsulfonamido)but-2-enyl carbonate (**7k**).**

To a solution of (*E*)-tert-butyl 4-hydroxybut-2-enyl carbonate **14** (188 mg, 1 mmol) in dry CH<sub>2</sub>Cl<sub>2</sub> (2 mL), Et<sub>3</sub>N (121 mg, 1.2 mmol) was added, and cooled in an ice water bath. Then, MsCl (159 mg, 1.1 mmol) was added dropwise, and stirred for 15 min. The mixture was quenched with saturated aq. NaHCO<sub>3</sub>, extracted with CH<sub>2</sub>Cl<sub>2</sub>, and dried over Na<sub>2</sub>SO<sub>4</sub>. The mixture was concentrated under reduced pressure and used without further purification. Then, K<sub>2</sub>CO<sub>3</sub> (276 mg, 2 mmol), *N*-(4-chloro-2-formylphenyl)-4-methylbenzenesulfonamide **16k** (279 mg, 0.9 mmol) and DMF (2 mL) were added. The mixture was stirred at 25 °C for 24 h. The mixture was diluted with EtOAc, washed with brine, and dried over Na<sub>2</sub>SO<sub>4</sub>. The mixture was concentrated under reduced pressure and purified by flash chromatography using petroleum ether/ethyl acetate (1/15) as eluents to afford **7k** (341 mg, 0.71 mmol, 71%, two steps). <sup>1</sup>H NMR (400 MHz, CDCl<sub>3</sub>) δ: 10.28 (s, 1H), 7.94 (d, *J* = 2.6 Hz, 1H), 7.47 (d, *J* = 8.3 Hz, 2H), 7.41 (dd, *J* = 8.5, 2.6 Hz, 1H), 7.30 (d, *J* = 8.0 Hz, 2H), 6.64 (d, *J* = 8.5 Hz, 1H), 5.70 (dt, *J* = 14.5, 6.7 Hz, 1H), 5.59 (dt, *J* = 15.5, 5.6 Hz, 1H), 4.64 – 4.45 (m, 1H), 4.38 (d, *J* = 5.4 Hz, 2H), 3.97 – 3.73 (m, 1H), 2.45 (s, 3H), 1.44 (s, 9H); <sup>13</sup>C NMR (101 MHz, CDCl<sub>3</sub>) δ: 188.6, 153.1, 144.7, 139.6, 137.2, 135.3, 134.2, 134.0, 130.4, 130.0, 129.5, 128.7, 128.0, 127.5, 82.6, 65.9, 53.2, 27.8, 21.8; HRMS (DART-TOF) calculated for C<sub>23</sub>H<sub>26</sub>ClNNaO<sub>6</sub>S<sup>+</sup> [M+Na]<sup>+</sup> *m/z* 502.1062, found 502.1069.

## Characterization Data for Compounds in Scheme 2

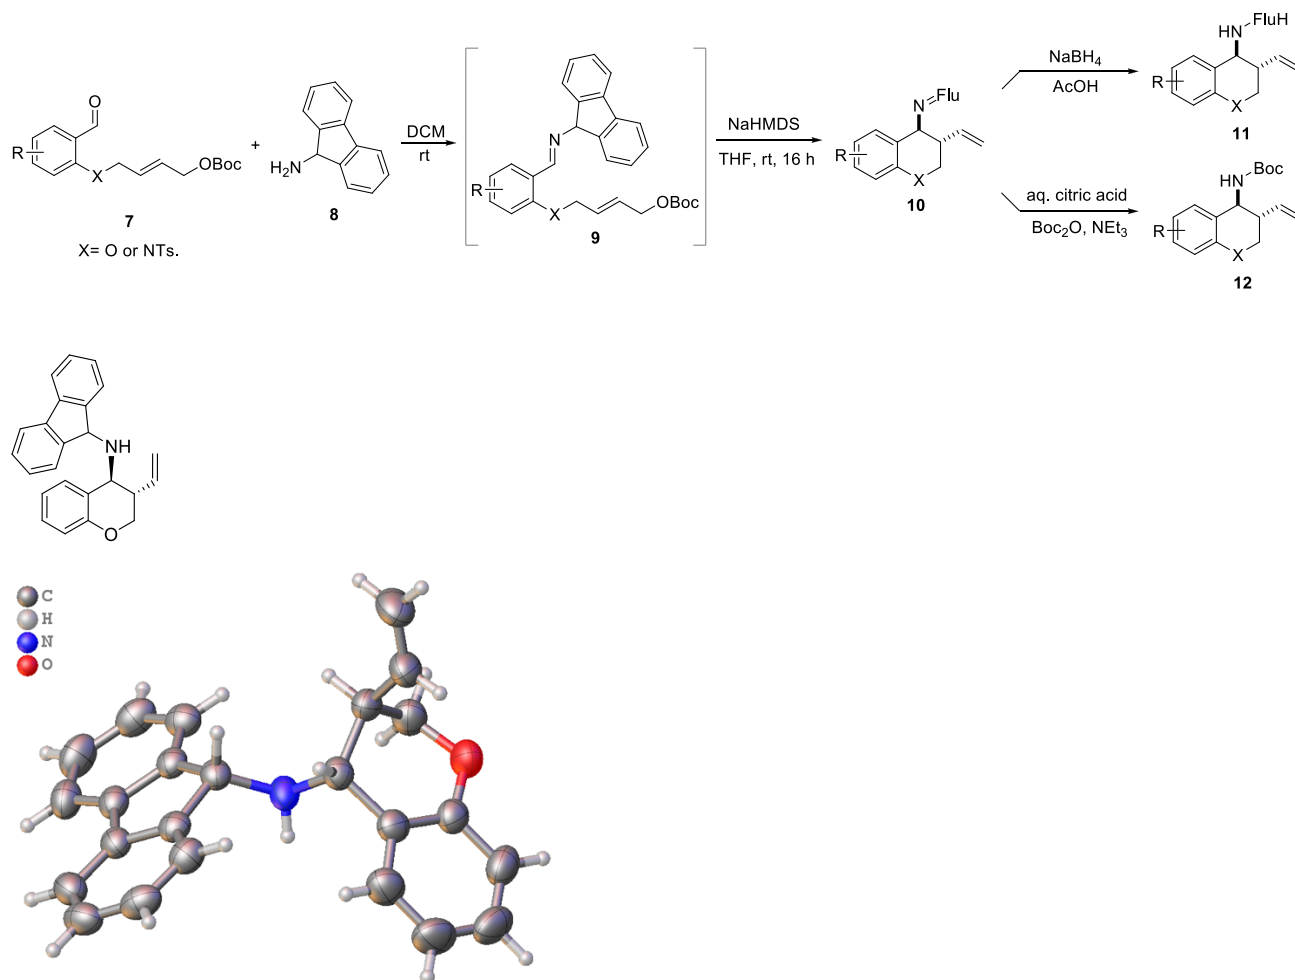

***N*-(9H-fluoren-9-yl)-3-vinylchroman-4-amine (11a)**, Following the **General Reaction Procedure A**, a mixture of aldehyde **7a** (0.50 mmol, 146 mg) and 9H-fluoren-9-amine **8** (0.50 mmol, 91 mg) in dry CH<sub>2</sub>Cl<sub>2</sub> (5.0 mL) was stirred at 25 °C for 5 h. The mixture was concentrated to give the corresponding *N*-fluorenyl imine **4** (without purification) and was transferred into the glove-box. THF (6.0 mL) was added into the vial, followed by NaHMDS (96 mg, 0.53 mmol, 1.05 equiv). The mixture was stirred for 16 h at 25 °C. The reaction was worked up following **General Workup Procedure A**. At the end of the reaction, the mixture was concentrated, and CH<sub>2</sub>Cl<sub>2</sub> (3 mL) was added, followed by NaBH<sub>4</sub> (1.5 mmol, 57 mg), and cooled in an ice water bath. AcOH (10 mmol, 0.6 mL) was added slowly for at least 15 minutes while the reaction mixture was rapidly stirred (**CAUTION**: gas evolution). The resulting mixture was warmed to room temperature, and stirred for 1-2 h. The reaction mixture was then cooled in an ice-water bath, and NaOH (10% aq., 5 mL) was added slowly while the reaction mixture was rapidly stirred. The reaction mixture was warmed to room temperature, and stirred for 30 min. The layers were separated, and the aqueous layer was extracted with CH<sub>2</sub>Cl<sub>2</sub> (5 mL) twice. The combined organic layers were washed with brine (5 mL), dried over Na<sub>2</sub>SO<sub>4</sub>, and concentrated under reduced pressure. Chromatographic purification on silica gel using petroleum ether/ethyl acetate (20/1) as eluents afforded **11a** as a white solid (108 mg, 0.32 mmol, 64%) in >20:1 *trans*:*cis*

diastereomeric ratio.

By using **General Reaction Procedure B**, a screw-capped vial containing aldehyde **7a** (0.50 mmol, 146 mg) and 9*H*-fluoren-9-amine **8** (0.50 mmol, 91 mg) in dry CH<sub>2</sub>Cl<sub>2</sub> (5.0 mL) was stirred at 25 °C for 5 h. The mixture was concentrated to give the corresponding *N*-fluorenyl imine **4** (without purification) and was transferred into the glove-box. PdCl<sub>2</sub> (5.3 mg, 0.03 mmol, 6 mol %), PCy<sub>3</sub> (34 mg, 0.12 mmol, 24 mol %), and THF (6.0 mL) were added into the vial, followed by NaHMDS (96 mg, 0.53 mmol, 1.05 equiv). The vial was sealed with a cap containing a PTFE septum, removed from the glove box, and kept at 25 °C for 16 h. The reaction was worked up following **General Workup Procedure A**. **11a** was obtained as a white solid (131 mg, 0.39 mmol, 77%) in 18:1 *trans*:*cis* diastereomeric ratio.

**trans**-diastereomer: <sup>1</sup>H NMR (400 MHz, CDCl<sub>3</sub>) δ: 7.75 – 7.69 (m, 3H), 7.63 – 7.59 (m, 1H), 7.42 – 7.29 (m, 4H), 7.14 – 7.08 (m, 1H), 7.03 (dd, *J* = 8.0, 1.6 Hz, 1H), 6.80 (t, *J* = 7.1 Hz, 2H), 5.58 (ddd, *J* = 17.6, 10.4, 7.6 Hz, 1H), 5.05 (s, 1H), 4.95 – 4.80 (m, 2H), 4.65 (dd, *J* = 10.5, 2.2 Hz, 1H), 4.15 – 4.08 (m, 1H), <sup>1</sup>H NMR (400 MHz, CDCl<sub>3</sub>) δ 3.78 – 3.75 (m, 1H), 2.45 – 2.33 (m, 1H), 1.90 (br s, 1H); <sup>13</sup>C NMR (101 MHz, CDCl<sub>3</sub>) δ: 154.7, 146.7, 145.9, 140.9, 140.7, 136.5, 130.6, 129.0, 128.4, 127.5, 127.5, 125.4, 125.4, 123.2, 120.6, 120.3, 120.1, 116.9, 116.8, 64.9, 62.1, 53.6, 41.6; HRMS (DART-TOF) calculated for C<sub>24</sub>H<sub>21</sub>NNaO<sup>+</sup> [M+Na]<sup>+</sup> *m/z* 362.1515, found 362.1523.

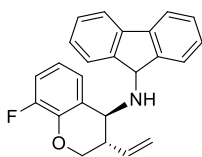

***N*-(9*H*-fluoren-9-yl)-8-fluoro-3-vinylchroman-4-amine (11b).** Following the **General Reaction Procedure A**, a mixture of aldehyde **7b** (0.50 mmol, 155 mg) and 9*H*-fluoren-9-amine **8** (0.50 mmol, 91 mg) in dry CH<sub>2</sub>Cl<sub>2</sub> (5.0 mL) was stirred at 25 °C for 5 h. The mixture was concentrated to give the corresponding *N*-fluorenyl imine (without purification) and was transferred into the glove-box. THF (6.0 mL) was added into the vial, followed by NaHMDS (96 mg, 0.53 mmol, 1.05 equiv). The mixture was stirred for 16 h at 25 °C. The reaction was worked up following **General Workup Procedure A**. At the end of the reaction, the mixture was concentrated, and CH<sub>2</sub>Cl<sub>2</sub> (3 mL) was added, followed by NaBH<sub>4</sub> (1.5 mmol, 57 mg), and cooled in an ice water bath. AcOH (10 mmol, 0.6 mL) was added slowly for at least 15 minutes while the reaction mixture was rapidly stirred (**CAUTION**: gas evolution). The resulting mixture was warmed to room temperature, and stirred for 1-2 h. The reaction mixture was then cooled in an ice-water bath, and NaOH (10% aq., 5 mL) was added slowly while the reaction mixture was rapidly stirred. The reaction mixture was warmed to room temperature, and stirred for 30 min. The layers were separated, and the aqueous layer was extracted with CH<sub>2</sub>Cl<sub>2</sub> (5 mL) twice. The combined organic layers were washed with brine (5 mL), dried over Na<sub>2</sub>SO<sub>4</sub>, and concentrated under reduced pressure. Chromatographic purification on silica gel using petroleum ether/ethyl acetate (20/1) as eluents afforded **11b** as a white solid (84 mg, 0.24 mmol, 47%) in >20:1 *trans*:*cis* diastereomeric ratio.

By using **General Reaction Procedure B**, a screw-capped vial containing aldehyde **7b** (0.50 mmol, 155 mg) and 9*H*-fluoren-9-amine **8** (0.50 mmol, 91 mg) in dry CH<sub>2</sub>Cl<sub>2</sub> (5.0 mL) was stirred at 25 °C for 5 h. The

mixture was concentrated to give the corresponding *N*-fluorenyl imine (without purification) and was transferred into the glove-box. PdCl<sub>2</sub> (5.3 mg, 0.03 mmol, 6 mol %), PCy<sub>3</sub> (34 mg, 0.12 mmol, 24 mol %), and THF (6.0 mL) were added into the vial, followed by NaHMDS (96 mg, 0.53 mmol, 1.05 equiv). The vial was sealed with a cap containing a PTFE septum, removed from the glove box, and kept at 25 °C for 16 h. The reaction was worked up following **General Workup Procedure A**. **11b** was obtained as a white solid (71 mg, 0.2 mmol, 40%) in 12:1 *trans:cis* diastereomeric ratio.

***trans*-diastereomer:** <sup>1</sup>H NMR (400 MHz, CDCl<sub>3</sub>) δ: 7.76 – 7.68 (m, 3H), 7.62 – 7.58 (m, 1H), 7.43 – 7.30 (m, 4H), 6.93 (ddd, *J* = 11.0, 7.9, 1.7 Hz, 1H), 6.81 – 6.77 (m, 1H), 6.75 – 6.69 (m, 1H), 5.54 (ddd, *J* = 17.4, 10.5, 7.5 Hz, 1H), 5.05 (s, 1H), 4.91 dt, *J* = 10.4, 1.2 Hz, 1H), 4.85 (dt, *J* = 17.3, 1.4 Hz, 1H), 4.68 (dd, *J* = 10.5, 2.4 Hz, 1H), 4.24 (ddd, *J* = 10.5, 2.2, 1.6 Hz, 1H), 3.76 (t, *J* = 1.6, 1H), 2.43 – 2.36 (m, 1H), 1.90 (br s, 1H); <sup>13</sup>C NMR (101 MHz, CDCl<sub>3</sub>) δ: 151.4 (d, *J* = 245.2 Hz), 146.4, 145.6, 143.1 (d, *J* = 11.0 Hz), 140.9, 140.7, 135.9, 128.5, 127.6, 127.5, 125.6 (d, *J* = 1.6 Hz), 125.5 (d, *J* = 3.5 Hz), 125.4, 125.3, 120.3, 120.1, 119.8 (d, *J* = 7.2 Hz), 117.1, 115.1 (d, *J* = 17.9 Hz), 65.2, 62.1, 53.0 (d, *J* = 2.7 Hz), 41.3; <sup>19</sup>F NMR (376 MHz, CDCl<sub>3</sub>) δ: -136.74; HRMS (DART-TOF) calculated for C<sub>24</sub>H<sub>21</sub>FNO<sup>+</sup> [M+H]<sup>+</sup> *m/z* 358.1602, found 358.1613.

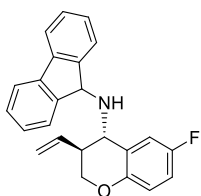

***N*-(9H-fluoren-9-yl)-6-fluoro-3-vinylchroman-4-amine (11c).** Following the **General Reaction Procedure A**, a mixture of aldehyde **7c** (0.50 mmol, 155 mg) and 9H-fluoren-9-amine **8** (0.50 mmol, 91 mg) in dry CH<sub>2</sub>Cl<sub>2</sub> (5.0 mL) was stirred at 25 °C for 5 h. The mixture was concentrated to give the corresponding *N*-fluorenyl imine (without purification) and was transferred into the glove-box. THF (6.0 mL) was added into the vial, followed by NaHMDS (96 mg, 0.53 mmol, 1.05 equiv). The mixture was stirred for 16 h at 25 °C. The reaction was worked up following **General Workup Procedure A**. At the end of the reaction, the mixture was concentrated, and CH<sub>2</sub>Cl<sub>2</sub> (3 mL) was added, followed by NaBH<sub>4</sub> (1.5 mmol, 57 mg), and cooled in an ice water bath. AcOH (10 mmol, 0.6 mL) was added slowly for at least 15 minutes while the reaction mixture was rapidly stirred (**CAUTION**: gas evolution). The resulting mixture was warmed to room temperature, and stirred for 1-2 h. The reaction mixture was then cooled in an ice-water bath, and NaOH (10% aq., 5 mL) was added slowly while the reaction mixture was rapidly stirred. The reaction mixture was warmed to room temperature, and stirred for 30 min. The layers were separated, and the aqueous layer was extracted with CH<sub>2</sub>Cl<sub>2</sub> (5 mL) twice. The combined organic layers were washed with brine (5 mL), dried over Na<sub>2</sub>SO<sub>4</sub>, and concentrated under reduced pressure. Chromatographic purification on silica gel using petroleum ether/ethyl acetate (20/1) as eluents afforded **11c** as a white solid (71 mg, 0.20 mmol, 40%) in >20:1 *trans:cis* diastereomeric ratio.

By using **General Reaction Procedure B**, a screw-capped vial containing aldehyde **7c** (0.50 mmol, 155 mg) and 9H-fluoren-9-amine **8** (0.50 mmol, 91 mg) in dry CH<sub>2</sub>Cl<sub>2</sub> (5.0 mL) was stirred at 25 °C for 5 h. The mixture was concentrated to give the corresponding *N*-fluorenyl imine (without purification) and was

transferred into the glove-box. PdCl<sub>2</sub> (5.3 mg, 0.03 mmol, 6 mol %), PCy<sub>3</sub> (34 mg, 0.12 mmol, 24 mol %), and THF (6.0 mL) were added into the vial, followed by NaHMDS (96 mg, 0.53 mmol, 1.05 equiv). The vial was sealed with a cap containing a PTFE septum, removed from the glove box, and kept at 25 °C for 16 h. The reaction was worked up following **General Workup Procedure A**. **11c** was obtained as a white solid (113 mg, 0.32 mmol, 63%) in 14.8:1 *trans*:*cis* diastereomeric ratio.

**trans-diastereomer:** <sup>1</sup>H NMR (400 MHz, CDCl<sub>3</sub>) δ: 7.76 – 7.67 (m, 3H), 7.61 – 7.58 (m, 1H), 7.44 – 7.30 (m, 4H), 6.86 – 6.79 (m, 1H), 6.76 – 6.66 (m, 2H), 5.53 (ddd, *J* = 17.4, 10.5, 7.6 Hz, 1H), 5.05 (s, 1H), 4.90 (dt, *J* = 10.8, 1.2 Hz, 1H), 4.81 (dt, *J* = 17.3, 1.4 Hz, 1H), 4.58 (dd, *J* = 10.6, 2.3 Hz, 1H), 4.09 (ddd, *J* = 10.6, 2.4, 1.6 Hz, 1H), 3.66 (t, *J* = 1.7 Hz, 1H), 2.39 – 2.33 (m, 1H), 1.85 (br s, 1H); <sup>13</sup>C NMR (101 MHz, CDCl<sub>3</sub>) δ: 156.8 (d, *J* = 238.3 Hz), 150.6 (d, *J* = 1.9 Hz), 146.3, 145.5, 140.9, 140.7, 136.1, 128.6, 128.5, 127.6, 127.5, 125.4, 125.3, 124.0 (d, *J* = 6.7 Hz), 120.3, 120.2, 117.9 (d, *J* = 7.9 Hz), 117.0, 116.2 (d, *J* = 19.5 Hz), 116.0 (d, *J* = 20.3 Hz), 65.0, 62.2, 53.5, 41.5; <sup>19</sup>F NMR (376 MHz, CDCl<sub>3</sub>) δ: -123.85; HRMS (DART-TOF) calculated for C<sub>24</sub>H<sub>21</sub>FNO<sup>+</sup> [M+H]<sup>+</sup> *m/z* 358.1602, found 358.1606.

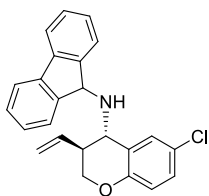

**6-chloro-N-(9H-fluoren-9-yl)-3-vinylchroman-4-amine (11d).** Following the **General Reaction Procedure A**, a mixture of aldehyde **7d** (0.50 mmol, 163 mg) and 9H-fluoren-9-amine **8** (0.50 mmol, 91 mg) in dry CH<sub>2</sub>Cl<sub>2</sub> (5.0 mL) was stirred at 25 °C for 5 h. The mixture was concentrated to give the corresponding *N*-fluorenyl imine (without purification) and was transferred into the glove-box. THF (6.0 mL) was added into the vial, followed by NaHMDS (96 mg, 0.53 mmol, 1.05 equiv). The mixture was stirred for 16 h at 25 °C. The reaction was worked up following **General Workup Procedure A**. At the end of the reaction, the mixture was concentrated, and CH<sub>2</sub>Cl<sub>2</sub> (3 mL) was added, followed by NaBH<sub>4</sub> (1.5 mmol, 57 mg), and cooled in an ice water bath. AcOH (10 mmol, 0.6 mL) was added slowly for at least 15 minutes while the reaction mixture was rapidly stirred (**CAUTION**: gas evolution). The resulting mixture was warmed to room temperature, and stirred for 1-2 h. The reaction mixture was then cooled in an ice-water bath, and NaOH (10% aq., 5 mL) was added slowly while the reaction mixture was rapidly stirred. The reaction mixture was warmed to room temperature, and stirred for 30 min. The layers were separated, and the aqueous layer was extracted with CH<sub>2</sub>Cl<sub>2</sub> (5 mL) twice. The combined organic layers were washed with brine (5 mL), dried over Na<sub>2</sub>SO<sub>4</sub>, and concentrated under reduced pressure. Chromatographic purification on silica gel using petroleum ether/ethyl acetate (20/1) as eluents afforded **11d** as a white solid (80 mg, 0.22 mmol, 43%) in >20:1 *trans*:*cis* diastereomeric ratio.

By using **General Reaction Procedure B**, a screw-capped vial containing aldehyde **7d** (0.50 mmol, 163 mg) and 9H-fluoren-9-amine **8** (0.50 mmol, 91 mg) in dry CH<sub>2</sub>Cl<sub>2</sub> (5.0 mL) was stirred at 25 °C for 5 h. The mixture was concentrated to give the corresponding *N*-fluorenyl imine (without purification) and was transferred into the glove-box. PdCl<sub>2</sub> (5.3 mg, 0.03 mmol, 6 mol %), PCy<sub>3</sub> (34 mg, 0.12 mmol, 24 mol %),

and THF (6.0 mL) were added into the vial, followed by NaHMDS (96 mg, 0.53 mmol, 1.05 equiv). The vial was sealed with a cap containing a PTFE septum, removed from the glove box, and kept at 25 °C for 16 h. The reaction was worked up following **General Workup Procedure A**. **11d** was obtained as a white solid (86 mg, 0.23 mmol, 46%) in 14:1 *trans*:*cis* diastereomeric ratio.

**trans**-diastereomer: <sup>1</sup>H NMR (400 MHz, CDCl<sub>3</sub>) δ: 7.76 – 7.64 (m, 3H), 7.61 – 7.57 (m, 1H), 7.44 – 7.30 (m, 4H), 7.05 (dd, *J* = 8.7, 2.6 Hz, 1H), 6.92 (d, *J* = 2.6 Hz, 1H), 6.72 (d, *J* = 8.8 Hz, 1H), 5.49 (ddd, *J* = 17.4, 10.5, 7.5 Hz, 1H), 5.04 (s, 1H), 4.89 (dt, *J* = 10.4, 1.2 Hz, 1H), 4.81 (dt, *J* = 17.3, 1.4 Hz, 1H), 4.60 (dd, *J* = 10.6, 2.4 Hz, 1H), 4.10 (ddd, *J* = 10.6, 2.3, 1.6 Hz, 1H), 3.65 (t, *J* = 1.7 Hz, 1H), 2.38 – 2.32 (m, 1H), 1.84 (br s, 1H); <sup>13</sup>C NMR (101 MHz, CDCl<sub>3</sub>) δ: 153.3, 146.2, 145.4, 140.9, 140.7, 135.9, 130.2, 129.0, 128.6, 128.5, 127.6, 127.5, 125.4, 125.3, 124.9, 124.6, 120.3, 120.2, 118.3, 117.0, 65.0, 62.1, 53.2, 41.2; HRMS (DART-TOF) calculated for C<sub>24</sub>H<sub>21</sub>ClNO<sup>+</sup> [M+H]<sup>+</sup> *m/z* 374.1306, found 374.1312.

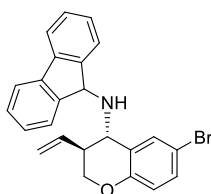

**6-bromo-N-(9H-fluoren-9-yl)-3-vinylchroman-4-amine (11e).** Following the **General Reaction Procedure A**, a mixture of aldehyde **7e** (0.50 mmol, 186 mg) and 9H-fluoren-9-amine **8** (0.50 mmol, 91 mg) in dry CH<sub>2</sub>Cl<sub>2</sub> (5.0 mL) was stirred at 25 °C for 5 h. The mixture was concentrated to give the corresponding *N*-fluorenyl imine (without purification) and was transferred into the glove-box. THF (6.0 mL) was added into the vial, followed by NaHMDS (96 mg, 0.53 mmol, 1.05 equiv). The mixture was stirred for 16 h at 25 °C. The reaction was worked up following **General Workup Procedure A**. At the end of the reaction, the mixture was concentrated, and CH<sub>2</sub>Cl<sub>2</sub> (3 mL) was added, followed by NaBH<sub>4</sub> (1.5 mmol, 57 mg), and cooled in an ice water bath. AcOH (10 mmol, 0.6 mL) was added slowly for at least 15 minutes while the reaction mixture was rapidly stirred (**CAUTION**: gas evolution). The resulting mixture was warmed to room temperature, and stirred for 1-2 h. The reaction mixture was then cooled in an ice-water bath, and NaOH (10% aq., 5 mL) was added slowly while the reaction mixture was rapidly stirred. The reaction mixture was warmed to room temperature, and stirred for 30 min. The layers were separated, and the aqueous layer was extracted with CH<sub>2</sub>Cl<sub>2</sub> (5 mL) twice. The combined organic layers were washed with brine (5 mL), dried over Na<sub>2</sub>SO<sub>4</sub>, and concentrated under reduced pressure. Chromatographic purification on silica gel using petroleum ether/ethyl acetate (20/1) as eluents afforded **11e** as a white solid (92 mg, 0.22 mmol, 44%) in >20:1 *trans*:*cis* diastereomeric ratio.

By using **General Reaction Procedure B**, a screw-capped vial containing aldehyde **7e** (0.50 mmol, 186 mg) and 9H-fluoren-9-amine **8** (0.50 mmol, 91 mg) in dry CH<sub>2</sub>Cl<sub>2</sub> (5.0 mL) was stirred at 25 °C for 5 h. The mixture was concentrated to give the corresponding *N*-fluorenyl imine (without purification) and was transferred into the glove-box. PdCl<sub>2</sub> (5.3 mg, 0.03 mmol, 6 mol %), PCy<sub>3</sub> (34 mg, 0.12 mmol, 24 mol %), and THF (6.0 mL) were added into the vial, followed by NaHMDS (96 mg, 0.53 mmol, 1.05 equiv). The vial was sealed with a cap containing a PTFE septum, removed from the glove box, and kept at 25 °C for 16 h.



The reaction was worked up following **General Workup Procedure A**. **11e** was obtained as a white solid (65 mg, 0.16 mmol, 31%) in 9:1 *trans:cis* diastereomeric ratio.

**trans-diastereomer:**  $^1\text{H}$  NMR (400 MHz,  $\text{CDCl}_3$ )  $\delta$ : 7.75 – 7.66 (m, 3H), 7.61 – 7.56 (m, 1H), 7.45 – 7.30 (m, 4H), 7.19 (dd,  $J$  = 8.7, 2.5 Hz, 1H), 7.04 (d,  $J$  = 2.4 Hz, 1H), 6.67 (d,  $J$  = 8.7 Hz, 1H), 5.48 (ddd,  $J$  = 17.4, 10.5, 7.5 Hz, 1H), 5.04 (s, 1H), 4.89 (dt,  $J$  = 10.4, 1.2 Hz, 1H), 4.81 (dt,  $J$  = 17.3, 1.4 Hz, 1H), 4.59 (dd,  $J$  = 10.6, 2.4 Hz, 1H), 4.10 (ddd,  $J$  = 10.6, 2.3, 1.7 Hz, 1H), 3.64 (t,  $J$  = 1.7 Hz, 1H), 2.38 – 2.30 (m, 1H), 1.85 (br s, 1H);  $^{13}\text{C}$  NMR (101 MHz,  $\text{CDCl}_3$ )  $\delta$ : 153.8, 146.2, 145.4, 140.9, 140.7, 135.9, 133.1, 131.8, 128.6, 128.5, 127.6, 127.5, 125.4, 125.3, 125.2, 120.3, 120.2, 118.8, 117.0, 112.2, 65.0, 62.1, 53.1, 41.1; HRMS (DART-TOF) calculated for  $\text{C}_{24}\text{H}_{21}\text{BrNO}^+ [\text{M}+\text{H}]^+$   $m/z$  418.0801, found 418.0807.

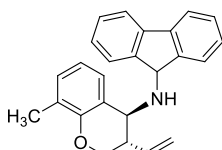

**N-(9H-fluoren-9-yl)-8-methyl-3-vinylchroman-4-amine (11f).** Following the **General Reaction Procedure A**, a mixture of aldehyde **7f** (0.50 mmol, 153 mg) and 9H-fluoren-9-amine **8** (0.50 mmol, 91 mg) in dry  $\text{CH}_2\text{Cl}_2$  (5.0 mL) was stirred at 25 °C for 5 h. The mixture was concentrated to give the corresponding *N*-fluorenyl imine (without purification) and was transferred into the glove-box. THF (6.0 mL) was added into the vial, followed by NaHMDS (96 mg, 0.53 mmol, 1.05 equiv). The mixture was stirred for 16 h at 25 °C. The reaction was worked up following **General Workup Procedure A**. At the end of the reaction, the mixture was concentrated, and  $\text{CH}_2\text{Cl}_2$  (3 mL) was added, followed by  $\text{NaBH}_4$  (1.5 mmol, 57 mg), and cooled in an ice water bath. AcOH (10 mmol, 0.6 mL) was added slowly for at least 15 minutes while the reaction mixture was rapidly stirred (**CAUTION**: gas evolution). The resulting mixture was warmed to room temperature, and stirred for 1-2 h. The reaction mixture was then cooled in an ice-water bath, and NaOH (10% aq., 5 mL) was added slowly while the reaction mixture was rapidly stirred. The reaction mixture was warmed to room temperature, and stirred for 30 min. The layers were separated, and the aqueous layer was extracted with  $\text{CH}_2\text{Cl}_2$  (5 mL) twice. The combined organic layers were washed with brine (5 mL), dried over  $\text{Na}_2\text{SO}_4$ , and concentrated under reduced pressure. Chromatographic purification on silica gel using petroleum ether/ethyl acetate (20/1) as eluents afforded **11f** as a white solid (133 mg, 0.38 mmol, 75%) in >20:1 *trans:cis* diastereomeric ratio.

By using **General Reaction Procedure B**, a screw-capped vial containing aldehyde **7f** (0.50 mmol, 153 mg) and 9H-fluoren-9-amine **8** (0.50 mmol, 91 mg) in dry  $\text{CH}_2\text{Cl}_2$  (5.0 mL) was stirred at 25 °C for 5 h. The mixture was concentrated to give the corresponding *N*-fluorenyl imine (without purification) and was transferred into the glove-box.  $\text{PdCl}_2$  (5.3 mg, 0.03 mmol, 6 mol %),  $\text{PCy}_3$  (34 mg, 0.12 mmol, 24 mol %), and THF (6.0 mL) were added into the vial, followed by NaHMDS (96 mg, 0.53 mmol, 1.05 equiv). The vial was sealed with a cap containing a PTFE septum, removed from the glove box, and kept at 25 °C for 16 h. The reaction was worked up following **General Workup Procedure A**. **11f** was obtained as a white solid (140 mg, 0.40 mmol, 79%) in 8:1 *trans:cis* diastereomeric ratio.

**trans-diastereomer:**  $^1\text{H}$  NMR (400 MHz,  $\text{CDCl}_3$ )  $\delta$ : 7.75 – 7.68 (m, 3H), 7.63 – 7.58 (m, 1H), 7.43 – 7.29

(m, 4H), 7.00 – 6.96 (m, 1H), 6.90 – 6.86 (m, 1H), 6.71 (t,  $J = 7.5$  Hz, 1H), 5.58 (ddd,  $J = 17.3, 10.5, 7.8$  Hz, 1H), 5.04 (s, 1H), 4.92 – 4.81 (m, 2H), 4.65 (dd,  $J = 10.5, 2.3$  Hz, 1H), 4.17 (ddd,  $J = 10.5, 2.3, 1.7$  Hz, 1H), 3.78 (t,  $J = 1.8$  Hz, 1H), 2.42 – 2.36 (m, 1H), 2.17 (s, 3H), 1.84 (br s, 1H);  $^{13}\text{C}$  NMR (101 MHz,  $\text{CDCl}_3$ )  $\delta$ : 152.8, 146.8, 145.9, 140.8, 140.7, 136.7, 129.9, 128.3, 128.1, 127.5, 127.4, 126.0, 125.4, 125.4, 122.5, 120.2, 120.0, 119.9, 116.6, 65.0, 62.1, 53.9, 41.5, 16.2; HRMS (DART-TOF) calculated for  $\text{C}_{25}\text{H}_{24}\text{NO}^+ [\text{M}+\text{H}]^+ m/z$  354.1852, found 354.1856.

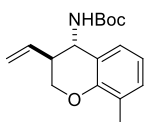

**tert-butyl-8-methyl-3-vinylchroman-4-ylcarbamate (12).**

When the above reaction was worked up following **General Workup Procedure B**. At the end of the reaction, the mixture was concentrated and hydroxylamine hydrochloride (1.0 M in Ethanol/  $\text{H}_2\text{O} = 4/1$ , 2 mL) was added. The resulting mixture was left at room temperature until the imine product was fully consumed (TLC, ~5 h). The mixture was then extracted with  $\text{Et}_2\text{O}$  (5 mL) to remove fluorenone. The aqueous layer was basified with saturated aq.  $\text{Na}_2\text{CO}_3$  to pH > 9, and extracted with  $\text{CH}_2\text{Cl}_2$  three times. To the combined organic layers were added  $\text{Et}_3\text{N}$  (200  $\mu\text{L}$ ) and  $\text{Boc}_2\text{O}$  (200  $\mu\text{L}$ ). The mixture was left at room temperature until full consumption of the primary amine, as indicated by TLC analysis. The mixture was concentrated and subjected to flash chromatography using petroleum ether/ethyl acetate (15/1) as eluents to give **12** as a white solid (104 mg, 0.36 mmol, 71%). *trans*-diastereomer:  $^1\text{H}$  NMR (400 MHz,  $\text{CDCl}_3$ )  $\delta$ : 7.11 (d,  $J = 7.6$  Hz, 1H), 7.02 (d,  $J = 7.2$  Hz, 1H), 6.81 (t,  $J = 7.5$  Hz, 1H), 5.76 (ddd,  $J = 18.0, 10.4, 8.0$  Hz, 1H), 5.29 (dt,  $J = 17.2, 1.2$  Hz, 1H), 5.17 (dt,  $J = 10.4, 1.2$  Hz, 1H), 4.76 – 4.69 (m, 1H), 4.23 (dd,  $J = 11.2, 3.3$  Hz, 1H), 4.12 (dd,  $J = 11.1, 7.5$  Hz, 1H), 2.69 – 2.60 (m, 1H), 2.17 (s, 3H), 1.47 (s, 9H);  $^{13}\text{C}$  NMR (101 MHz,  $\text{CDCl}_3$ )  $\delta$ : 155.7, 152.9, 135.3, 130.2, 126.8, 126.0, 121.5, 120.3, 118.1, 79.8, 67.4, 50.1, 43.5, 28.5, 16.1.

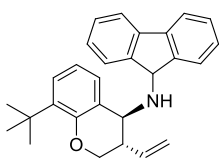

**8-tert-butyl-N-(9H-fluoren-9-yl)-3-vinylchroman-4-amine (11g).** Following the **General Reaction Procedure A**, a mixture of aldehyde **7g** (0.50 mmol, 174 mg) and 9H-fluoren-9-amine **8** (0.50 mmol, 91 mg) in dry  $\text{CH}_2\text{Cl}_2$  (5.0 mL) was stirred at 25 °C for 5 h. The mixture was concentrated to give the corresponding *N*-fluorenyl imine (without purification) and was transferred into the glove-box. THF (6.0 mL) was added into the vial, followed by NaHMDS (96 mg, 0.53 mmol, 1.05 equiv). The mixture was stirred for 16 h at 25 °C. The reaction was worked up following **General Workup Procedure A**. At the end of the reaction, the mixture was concentrated, and  $\text{CH}_2\text{Cl}_2$  (3 mL) was added, followed by  $\text{NaBH}_4$  (1.5 mmol, 57 mg), and cooled in an ice water bath. AcOH (10 mmol, 0.6 mL) was added slowly for at least 15 minutes while the reaction mixture was rapidly stirred (**CAUTION**: gas evolution). The resulting mixture was warmed to room temperature, and stirred for 1-2 h. The reaction mixture was then cooled in an ice-water bath, and NaOH (10% aq., 5 mL) was

added slowly while the reaction mixture was rapidly stirred. The reaction mixture was warmed to room temperature, and stirred for 30 min. The layers were separated, and the aqueous layer was extracted with CH<sub>2</sub>Cl<sub>2</sub> (5 mL) twice. The combined organic layers were washed with brine (5 mL), dried over Na<sub>2</sub>SO<sub>4</sub>, and concentrated under reduced pressure. Chromatographic purification on silica gel using petroleum ether/ethyl acetate (20/1) as eluents afforded **11g** as a white solid (123 mg, 0.31 mmol, 62%) in 4.2:1 *trans:cis* diastereomeric ratio.

By using **General Reaction Procedure B**, a screw-capped vial containing aldehyde **7g** (0.50 mmol, 174 mg) and 9*H*-fluoren-9-amine **8** (0.50 mmol, 91 mg) in dry CH<sub>2</sub>Cl<sub>2</sub> (5.0 mL) was stirred at 25 °C for 5 h. The mixture was concentrated to give the corresponding *N*-fluorenyl imine (without purification) and was transferred into the glove-box. PdCl<sub>2</sub> (5.3 mg, 0.03 mmol, 6 mol %), PCy<sub>3</sub> (34 mg, 0.12 mmol, 24 mol %), and THF (6.0 mL) were added into the vial, followed by NaHMDS (96 mg, 0.53 mmol, 1.05 equiv). The vial was sealed with a cap containing a PTFE septum, removed from the glove box, and kept at 25 °C for 16 h. The reaction was worked up following **General Workup Procedure A**. **11g** was obtained as a white solid (99 mg, 0.25 mmol, 50%) in 6.1:1 *trans:cis* diastereomeric ratio.

**trans-diastereomer:** <sup>1</sup>H NMR (400 MHz, CDCl<sub>3</sub>) δ: 7.77 – 7.66 (m, 3H), 7.62 – 7.58 (m, 1H), 7.42 – 7.28 (m, 4H), 7.13 (dd, *J* = 7.7, 1.6 Hz, 1H), 6.91 (dd, *J* = 7.6, 1.5 Hz, 1H), 6.74 (t, *J* = 7.6 Hz, 1H), 5.57 (ddd, *J* = 16.6, 11.2, 7.7 Hz, 1H), 5.04 (s, 1H), 4.93 – 4.84 (m, 2H), 4.64 (dd, *J* = 10.4, 2.4 Hz, 1H), 4.19 (ddd, *J* = 10.4, 2.4, 1.8 Hz, 1H), 3.79 (t, *J* = 1.8 Hz, 1H), 2.43 – 2.37 (m, 1H), 1.83 (br s, 1H), 1.35 (s, 9H); <sup>13</sup>C NMR (101 MHz, CDCl<sub>3</sub>) δ: 153.5, 146.9, 145.9, 140.8, 140.7, 137.7, 136.7, 128.7, 128.3, 127.5, 127.4, 125.9, 125.4, 123.3, 120.2, 120.0, 119.7, 116.4, 64.1, 62.1, 54.5, 41.1, 34.9, 29.7; HRMS (DART-TOF) calculated for C<sub>28</sub>H<sub>30</sub>NO<sup>+</sup> [M+H]<sup>+</sup> *m/z* 396.2322, found 396.2325.

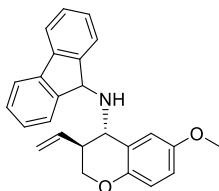

***N*-(9*H*-fluoren-9-yl)-6-methoxy-3-vinylchroman-4-amine (11h).** Following the **General Reaction Procedure A**, a mixture of aldehyde **7h** (0.50 mmol, 161 mg) and 9*H*-fluoren-9-amine **8** (0.50 mmol, 91 mg) in dry CH<sub>2</sub>Cl<sub>2</sub> (5.0 mL) was stirred at 25 °C for 16 h. The mixture was concentrated to give the corresponding *N*-fluorenyl imine (without purification) and was transferred into the glove-box. THF (6.0 mL) was added into the vial, followed by NaHMDS (96 mg, 0.53 mmol, 1.05 equiv). The mixture was stirred for 16 h at 25 °C. The reaction was worked up following **General Workup Procedure A**. At the end of the reaction, the mixture was concentrated, and CH<sub>2</sub>Cl<sub>2</sub> (3 mL) was added, followed by NaBH<sub>4</sub> (1.5 mmol, 57 mg), and cooled in an ice water bath. AcOH (10 mmol, 0.6 mL) was added slowly for at least 15 minutes while the reaction mixture was rapidly stirred (**CAUTION:** gas evolution). The resulting mixture was warmed to room temperature, and stirred for 1-2 h. The reaction mixture was then cooled in an ice-water bath, and NaOH (10% aq., 5 mL) was added slowly while the reaction mixture was rapidly stirred. The reaction mixture was warmed to room temperature, and stirred for 30 min. The layers were separated, and the aqueous layer was extracted with

CH<sub>2</sub>Cl<sub>2</sub> (5 mL) twice. The combined organic layers were washed with brine (5 mL), dried over Na<sub>2</sub>SO<sub>4</sub>, and concentrated under reduced pressure. Chromatographic purification on silica gel using petroleum ether/ethyl acetate (20/1) as eluents afforded **11h** as a white solid (76 mg, 0.21 mmol, 41%) in >20:1 *trans:cis* diastereomeric ratio.

By using **General Reaction Procedure B**, a screw-capped vial containing aldehyde **7h** (0.50 mmol, 161 mg) and 9*H*-fluoren-9-amine **8** (0.50 mmol, 91 mg) in dry CH<sub>2</sub>Cl<sub>2</sub> (5.0 mL) was stirred at 25 °C for 5 h. The mixture was concentrated to give the corresponding *N*-fluorenyl imine (without purification) and was transferred into the glove-box. PdCl<sub>2</sub> (5.3 mg, 0.03 mmol, 6 mol %), PCy<sub>3</sub> (34 mg, 0.12 mmol, 24 mol %), and THF (6.0 mL) were added into the vial, followed by NaHMDS (96 mg, 0.53 mmol, 1.05 equiv). The vial was sealed with a cap containing a PTFE septum, removed from the glove box, and kept at 25 °C for 16 h. The reaction was worked up following **General Workup Procedure A**. **11h** was obtained as a white solid (139 mg, 0.38 mmol, 75%) in 18.7:1 *trans:cis* diastereomeric ratio.

**trans-diastereomer:** <sup>1</sup>H NMR (400 MHz, CDCl<sub>3</sub>) δ: 7.76 – 7.68 (m, 3H), 7.65 – 7.59 (m, 1H), 7.42 – 7.29 (m, 4H), 6.75 – 6.68 (m, 2H), 6.52 (d, *J* = 2.3 Hz, 1H), 5.56 (ddd, *J* = 17.3, 10.5, 7.7 Hz, 1H), 5.06 (s, 1H), 4.88 (ddd, *J* = 10.5, 1.7, 1.0 Hz, 1H), 4.80 (dt, *J* = 17.2, 1.2 Hz, 1H), 4.57 (dd, *J* = 10.5, 2.3 Hz, 1H), 4.07 (ddd, *J* = 10.5, 2.5, 1.6 Hz, 1H), 3.67 (s, 3H), 3.62 (t, *J* = 1.6 Hz, 1H), 2.42 – 2.30 (m, 1H), 1.93 (br s, 1H); <sup>13</sup>C NMR (101 MHz, CDCl<sub>3</sub>) δ: 153.5, 148.6, 146.3, 145.9, 141.0, 140.8, 136.5, 128.4, 128.4, 127.5, 127.4, 125.6, 125.3, 123.5, 120.3, 120.1, 117.6, 116.7, 115.6, 114.6, 64.9, 62.3, 55.8, 53.7, 42.0; HRMS (DART-TOF) calculated for C<sub>25</sub>H<sub>23</sub>NNaO<sub>2</sub><sup>+</sup> [M+Na]<sup>+</sup> *m/z* 392.1621, found 392.1620.

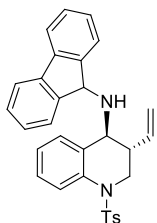

***N*-(9*H*-fluoren-9-yl)-1-tosyl-3-vinyl-1,2,3,4-tetrahydroquinolin-4-amine (11i).** Following the **General Reaction Procedure A**, a mixture of aldehyde **7i** (0.50 mmol, 223 mg) and 9*H*-fluoren-9-amine **8** (0.50 mmol, 91 mg) in dry CH<sub>2</sub>Cl<sub>2</sub> (5.0 mL) was stirred at 25 °C for 5h. The mixture was concentrated to give the corresponding *N*-fluorenyl imine (without purification) and was transferred into the glove-box. THF (6.0 mL) was added into the vial, followed by NaHMDS (96 mg, 0.53 mmol, 1.05 equiv). The mixture was stirred for 16 h at 25 °C. The reaction was worked up following **General Workup Procedure A**. At the end of the reaction, the mixture was concentrated, and CH<sub>2</sub>Cl<sub>2</sub> (3 mL) was added, followed by NaBH<sub>4</sub> (1.5 mmol, 57 mg), and cooled in an ice water bath. AcOH (10 mmol, 0.6 mL) was added slowly for at least 15 minutes while the reaction mixture was rapidly stirred (**CAUTION:** gas evolution). The resulting mixture was warmed to room temperature, and stirred for 1-2 h. The reaction mixture was then cooled in an ice-water bath, and NaOH (10% aq., 5 mL) was added slowly while the reaction mixture was rapidly stirred. The reaction mixture was warmed to room temperature, and stirred for 30 min. The layers were separated, and the aqueous layer was extracted with CH<sub>2</sub>Cl<sub>2</sub> (5 mL) twice. The combined organic layers were washed with brine (5 mL), dried

over Na<sub>2</sub>SO<sub>4</sub>, and concentrated under reduced pressure. Chromatographic purification on silica gel using petroleum ether/ethyl acetate (20/1) as eluents afforded **11i** as a white solid (143 mg, 0.29 mmol, 58%) in >20:1 *trans:cis* diastereomeric ratio.

By using **General Reaction Procedure B**, a screw-capped vial containing aldehyde **7i** (0.50 mmol, 223 mg) and 9*H*-fluoren-9-amine **8** (0.50 mmol, 91 mg) in dry CH<sub>2</sub>Cl<sub>2</sub> (5.0 mL) was stirred at 25 °C for 5 h. The mixture was concentrated to give the corresponding *N*-fluorenyl imine (without purification) and was transferred into the glove-box. PdCl<sub>2</sub> (5.3 mg, 0.03 mmol, 6 mol %), PCy<sub>3</sub> (34 mg, 0.12 mmol, 24 mol %), and THF (6.0 mL) were added into the vial, followed by NaHMDS (96 mg, 0.53 mmol, 1.05 equiv). The vial was sealed with a cap containing a PTFE septum, removed from the glove box, and kept at 25 °C for 16 h. The reaction was worked up following **General Workup Procedure A**. **11i** was obtained as a white solid (209 mg, 0.43 mmol, 85%) in 16:1 *trans:cis* diastereomeric ratio.

**trans-diastereomer:** <sup>1</sup>H NMR (400 MHz, CDCl<sub>3</sub>) δ: 7.78 (d, *J* = 8.3 Hz, 1H), 7.71 – 7.63 (m, 4H), 7.57 (d, *J* = 7.4 Hz, 1H), 7.42 – 7.35 (m, 2H), 7.33 – 7.27 (m, 3H), 7.21 – 7.14 (m, 3H), 7.03 (dd, *J* = 7.6, 1.4 Hz, 1H), 6.96 (td, *J* = 7.5, 0.9 Hz, 1H), 5.41 (ddd, *J* = 17.6, 10.1, 7.6 Hz, 1H), 4.96 – 4.87 (m, 2H), 4.77 (s, 1H), 4.14 (dd, *J* = 12.0, 4.4 Hz, 1H), 4.00 (dd, *J* = 12.1, 3.9 Hz, 1H), 3.69 (d, *J* = 4.1 Hz, 1H), 2.57 – 2.49 (m, 1H), 2.29 (s, 3H), 1.40 (br s, 1H); <sup>13</sup>C NMR (101 MHz, CDCl<sub>3</sub>) δ: 146.5, 145.9, 143.9, 140.7, 140.5, 136.8, 136.8, 136.3, 130.0, 129.9, 129.7, 128.4, 128.4, 128.3, 127.5, 127.4, 127.4, 125.2, 125.2, 124.0, 122.0, 120.2, 120.0, 117.6, 62.1, 56.4, 46.8, 42.5, 21.6; HRMS (DART-TOF) calculated for C<sub>31</sub>H<sub>29</sub>N<sub>2</sub>O<sub>2</sub>S<sup>+</sup> [M+H]<sup>+</sup> *m/z* 493.1944, found 493.1940.

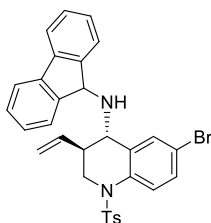

**6-bromo-*N*-(9*H*-fluoren-9-yl)-1-tosyl-3-vinyl-1,2,3,4-tetrahydroquinolin-4-amine (**11j**).** Following the **General Reaction Procedure A**, a mixture of aldehyde **7j** (0.50 mmol, 262 mg) and 9*H*-fluoren-9-amine **8** (0.50 mmol, 91 mg) in dry CH<sub>2</sub>Cl<sub>2</sub> (5.0 mL) was stirred at 25 °C for 5h. The mixture was concentrated to give the corresponding *N*-fluorenyl imine (without purification) and was transferred into the glove-box. THF (6.0 mL) was added into the vial, followed by NaHMDS (96 mg, 0.53 mmol, 1.05 equiv). The mixture was stirred for 16 h at 25 °C. The reaction was worked up following **General Workup Procedure A**. At the end of the reaction, the mixture was concentrated, and CH<sub>2</sub>Cl<sub>2</sub> (3 mL) was added, followed by NaBH<sub>4</sub> (1.5 mmol, 57 mg), and cooled in an ice water bath. AcOH (10 mmol, 0.6 mL) was added slowly for at least 15 minutes while the reaction mixture was rapidly stirred (**CAUTION:** gas evolution). The resulting mixture was warmed to room temperature, and stirred for 1-2 h. The reaction mixture was then cooled in an ice-water bath, and NaOH (10% aq., 5 mL) was added slowly while the reaction mixture was rapidly stirred. The reaction mixture was warmed to room temperature, and stirred for 30 min. The layers were separated, and the aqueous layer was extracted with CH<sub>2</sub>Cl<sub>2</sub> (5 mL) twice. The combined organic layers were washed with

brine (5 mL), dried over Na<sub>2</sub>SO<sub>4</sub>, and concentrated under reduced pressure. Chromatographic purification on silica gel using petroleum ether/ethyl acetate (20/1) as eluents afforded **11j** as a white solid (191 mg, 0.34 mmol, 67%) in 11:1 *trans:cis* diastereomeric ratio. By using **General Reaction Procedure B**, a screw-capped vial containing aldehyde **7j** (0.50 mmol, 262 mg) and 9*H*-fluoren-9-amine **8** (0.50 mmol, 91 mg) in dry CH<sub>2</sub>Cl<sub>2</sub> (5.0 mL) was stirred at 25 °C for 5 h. The mixture was concentrated to give the corresponding *N*-fluorenyl imine (without purification) and was transferred into the glove-box. PdCl<sub>2</sub> (5.3 mg, 0.03 mmol, 6 mol %), PCy<sub>3</sub> (34 mg, 0.12 mmol, 24 mol %), and THF (6.0 mL) were added into the vial, followed by NaHMDS (96 mg, 0.53 mmol, 1.05 equiv). The vial was sealed with a cap containing a PTFE septum, removed from the glove box, and kept at 25 °C for 16 h. The reaction was worked up following **General Workup Procedure A**. **11j** was obtained as a white solid (206 mg, 0.36 mmol, 72%) in 10:1 *trans:cis* diastereomeric ratio.

**trans-diastereomer:** <sup>1</sup>H NMR (400 MHz, CDCl<sub>3</sub>) δ: 7.73 – 7.61 (m, 5H), 7.53 (d, *J* = 7.3 Hz, 1H), 7.43 – 7.35 (m, 2H), 7.31 (td, *J* = 7.4, 1.1 Hz, 1H), 7.28 – 7.17 (m, 5H), 7.00 (d, *J* = 2.4 Hz, 1H), 5.31 (ddd, *J* = 16.8, 10.8, 7.4 Hz, 1H), 4.93 – 4.83 (m, 2H), 4.72 (s, 1H), 4.08 (dd, *J* = 12.1, 4.6 Hz, 1H), 3.94 (dd, *J* = 12.1, 4.2 Hz, 1H), 3.49 (d, *J* = 4.3 Hz, 1H), 2.52 – 2.43 (m, 1H), 2.31 (s, 3H), 1.38 (br s, 1H); <sup>13</sup>C NMR (101 MHz, CDCl<sub>3</sub>) δ: 145.8, 145.5, 144.2, 140.7, 140.6, 136.2, 135.7, 132.5, 132.2, 131.2, 129.8, 128.6, 128.5, 127.6, 127.5, 127.4, 125.2, 125.0, 123.7, 120.2, 120.1, 117.9, 116.9, 62.1, 55.7, 46.7, 42.5, 21.7; **HRMS (DART-TOF)** calculated for C<sub>31</sub>H<sub>28</sub>BrN<sub>2</sub>O<sub>2</sub>S<sup>+</sup> [*M*+H]<sup>+</sup> *m/z* 571.1049, found 571.1058.

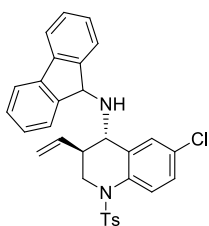

**6-chloro-*N*-(9*H*-fluoren-9-yl)-1-tosyl-3-vinyl-1,2,3,4-tetrahydroquinolin-4-amine (11k).** Following the **General Reaction Procedure A**, a mixture of aldehyde **7k** (0.50 mmol, 240 mg) and 9*H*-fluoren-9-amine **8** (0.50 mmol, 91 mg) in dry CH<sub>2</sub>Cl<sub>2</sub> (5.0 mL) was stirred at 25 °C for 5h. The mixture was concentrated to give the corresponding *N*-fluorenyl imine (without purification) and was transferred into the glove-box. THF (6.0 mL) was added into the vial, followed by NaHMDS (96 mg, 0.53 mmol, 1.05 equiv). The mixture was stirred for 16 h at 25 °C. The reaction was worked up following **General Workup Procedure A**. At the end of the reaction, the mixture was concentrated, and CH<sub>2</sub>Cl<sub>2</sub> (3 mL) was added, followed by NaBH<sub>4</sub> (1.5 mmol, 57 mg), and cooled in an ice water bath. AcOH (10 mmol, 0.6 mL) was added slowly for at least 15 minutes while the reaction mixture was rapidly stirred (**CAUTION**: gas evolution). The resulting mixture was warmed to room temperature, and stirred for 1-2 h. The reaction mixture was then cooled in an ice-water bath, and NaOH (10% aq., 5 mL) was added slowly while the reaction mixture was rapidly stirred. The reaction mixture was warmed to room temperature, and stirred for 30 min. The layers were separated, and the aqueous layer was extracted with CH<sub>2</sub>Cl<sub>2</sub> (5 mL) twice. The combined organic layers were washed with brine (5 mL), dried over Na<sub>2</sub>SO<sub>4</sub>, and concentrated under reduced pressure. Chromatographic purification on silica gel using

petroleum ether/ethyl acetate (20/1) as eluents afforded **11k** as a white solid (182 mg, 0.35 mmol, 69%) in 11:1 *trans:cis* diastereomeric ratio.

By using **General Reaction Procedure B**, a screw-capped vial containing aldehyde **7k** (0.50 mmol, 240 mg) and 9*H*-fluoren-9-amine **8** (0.50 mmol, 91 mg) in dry CH<sub>2</sub>Cl<sub>2</sub> (5.0 mL) was stirred at 25 °C for 5 h. The mixture was concentrated to give the corresponding *N*-fluorenyl imine (without purification) and was transferred into the glove-box. PdCl<sub>2</sub> (5.3 mg, 0.03 mmol, 6 mol %), PCy<sub>3</sub> (34 mg, 0.12 mmol, 24 mol %), and THF (6.0 mL) were added into the vial, followed by NaHMDS (96 mg, 0.53 mmol, 1.05 equiv). The vial was sealed with a cap containing a PTFE septum, removed from the glove box, and kept at 25 °C for 16 h. The reaction was worked up following **General Workup Procedure A**. **11k** was obtained as a white solid (200 mg, 0.38 mmol, 76%) in 20:1 *trans:cis* diastereomeric ratio.

**trans-diastereomer:** <sup>1</sup>H NMR (400 MHz, CDCl<sub>3</sub>) δ: 7.75 (d, *J* = 8.9 Hz, 1H), 7.69 (d, *J* = 7.5 Hz, 2H), 7.64 (d, *J* = 8.3 Hz, 2H), 7.54 (d, *J* = 7.1 Hz, 1H), 7.39 (dd, *J* = 13.7, 6.5 Hz, 2H), 7.31 (td, *J* = 7.4, 1.1 Hz, 1H), 7.28 – 7.17 (m, 4H), 7.13 (dd, *J* = 8.9, 2.6 Hz, 1H), 6.88 (d, *J* = 2.5 Hz, 1H), 5.32 (ddd, *J* = 16.6, 10.9, 7.5 Hz, 1H), 4.95 – 4.84 (m, 2H), 4.73 (s, 1H), 4.08 (dd, *J* = 12.1, 4.6 Hz, 1H), 3.94 (dd, *J* = 12.1, 3.9 Hz, 1H), 3.51 (d, *J* = 4.4 Hz, 1H), 2.52 – 2.44 (m, 1H), 2.31 (s, 3H), 1.36 (br s, 1H); <sup>13</sup>C NMR (101 MHz, CDCl<sub>3</sub>) δ: 145.9, 145.5, 144.2, 140.7, 140.5, 136.3, 135.8, 135.2, 132.0, 129.8, 129.5, 129.2, 128.6, 128.5, 128.3, 127.6, 127.5, 127.4, 125.1, 125.0, 123.6, 120.2, 120.1, 117.9, 62.1, 55.8, 46.8, 42.6, 21.7; **HRMS (DART-TOF)** calculated for C<sub>31</sub>H<sub>28</sub>ClN<sub>2</sub>O<sub>2</sub>S<sup>+</sup> [M+H]<sup>+</sup> *m/z* 527.1555, found 527.1559.

## NMR Spectra

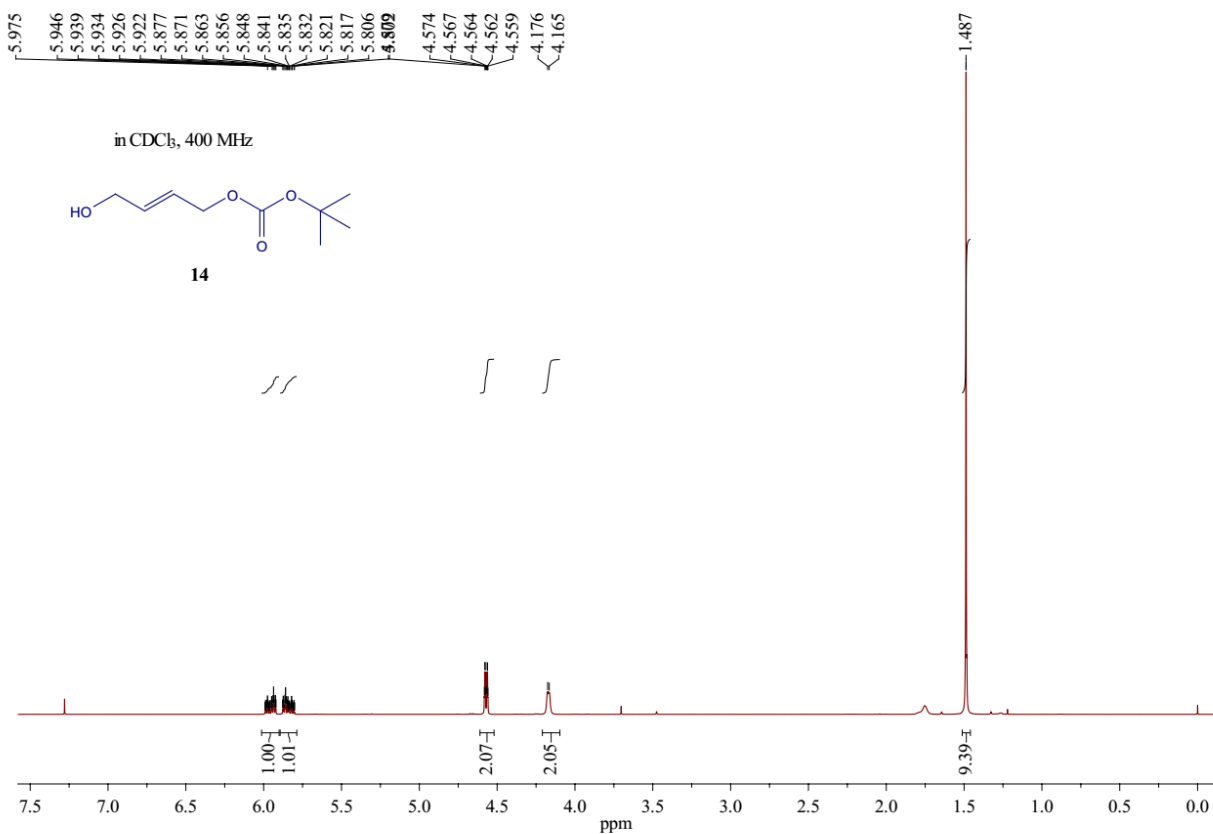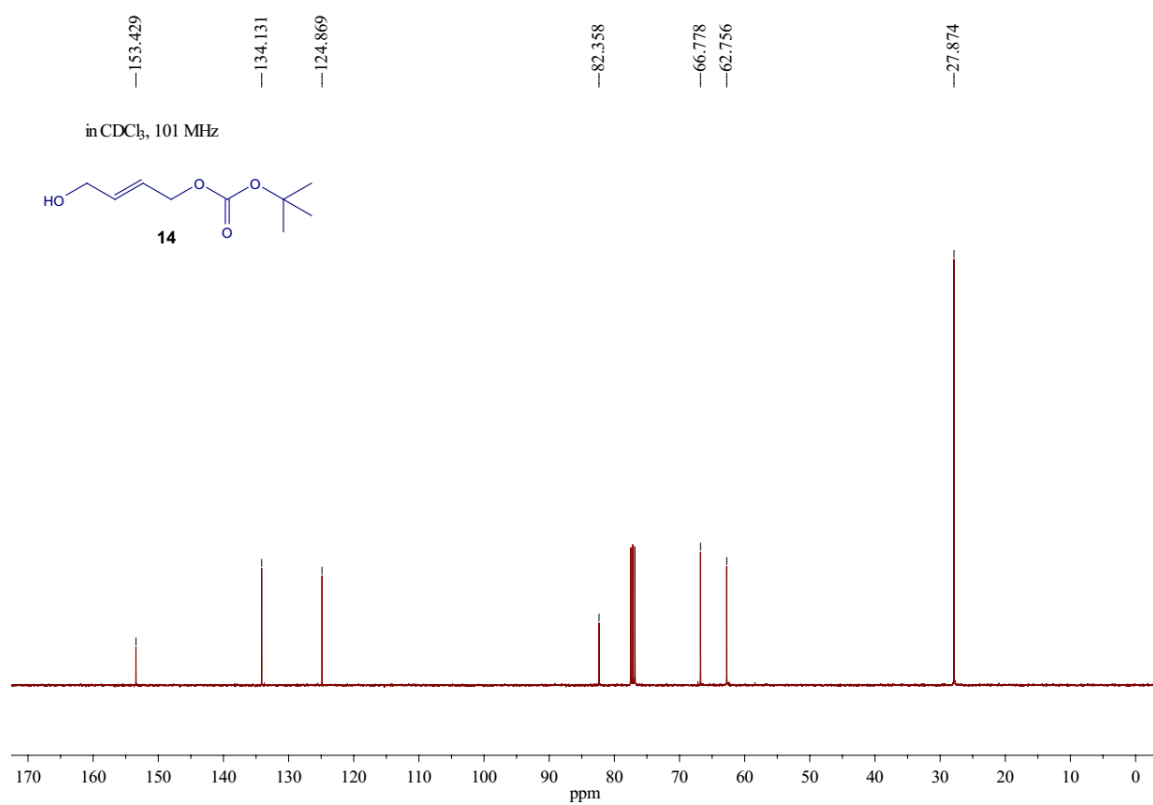



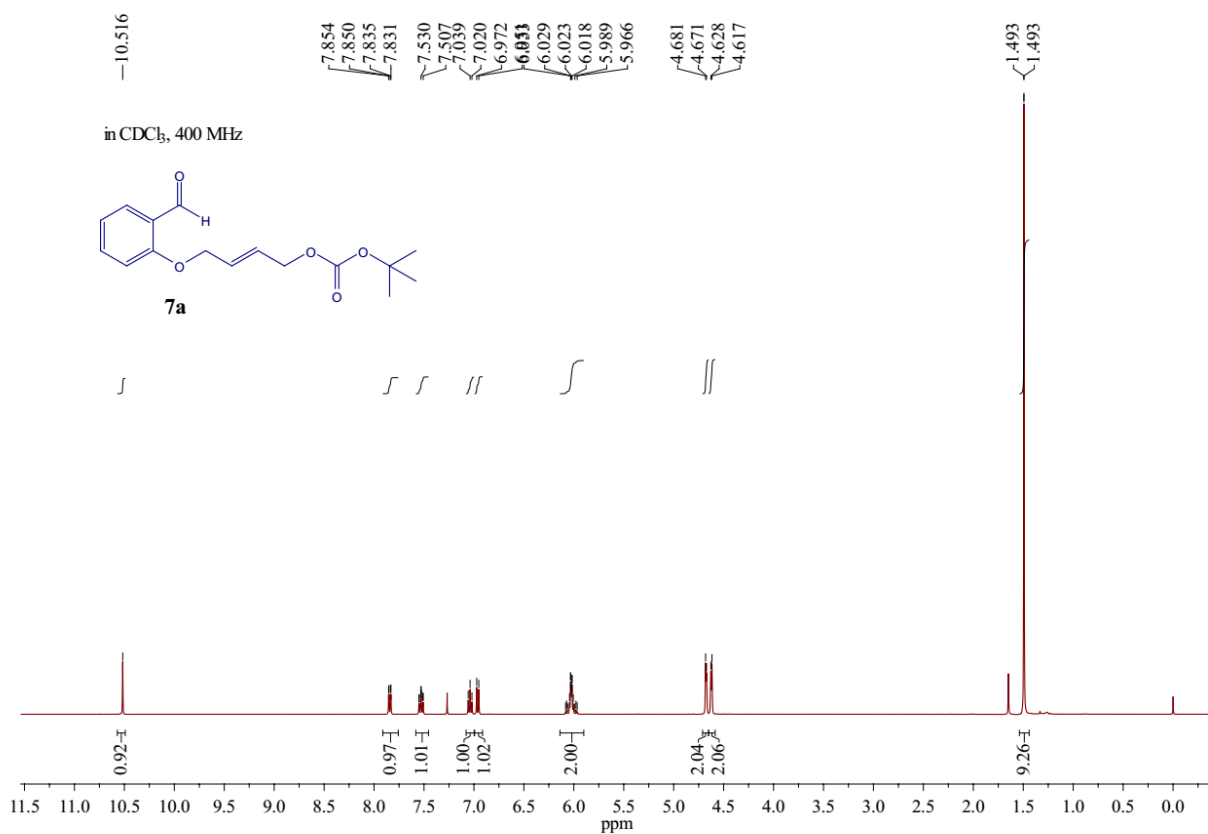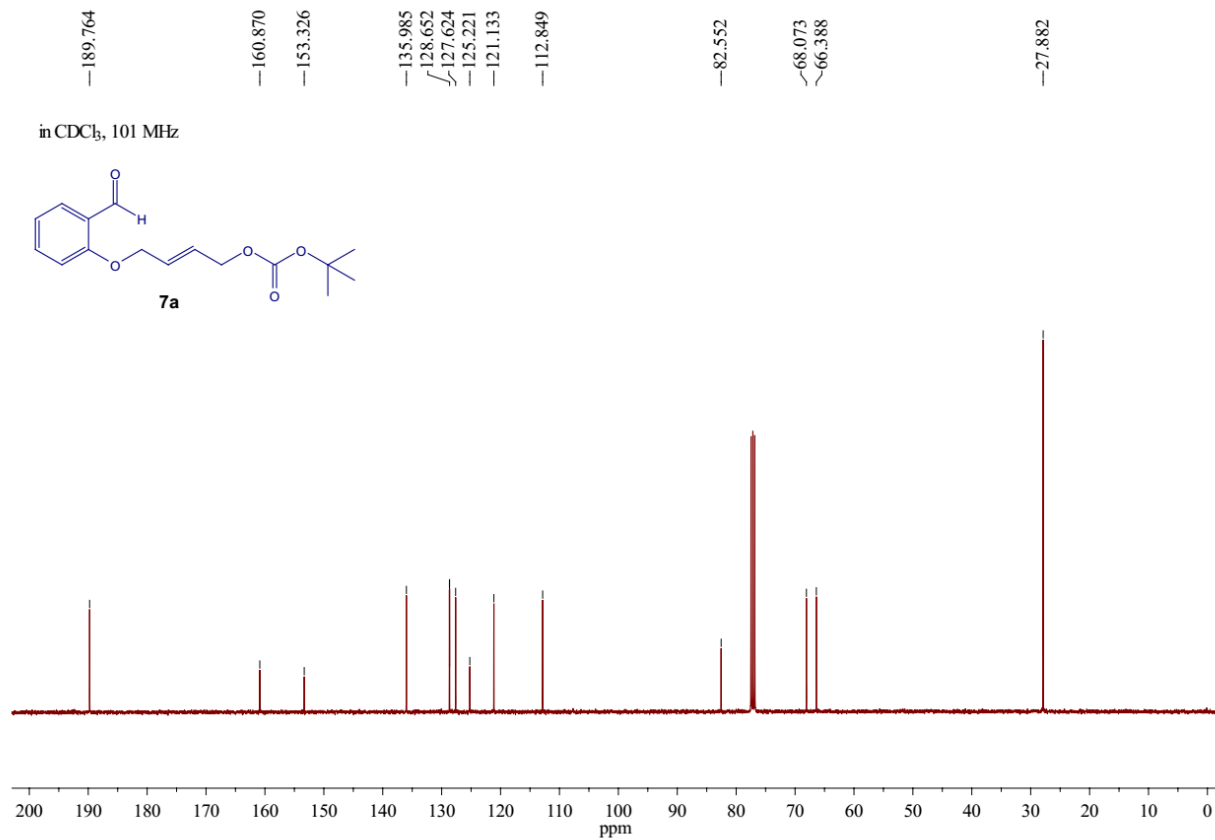

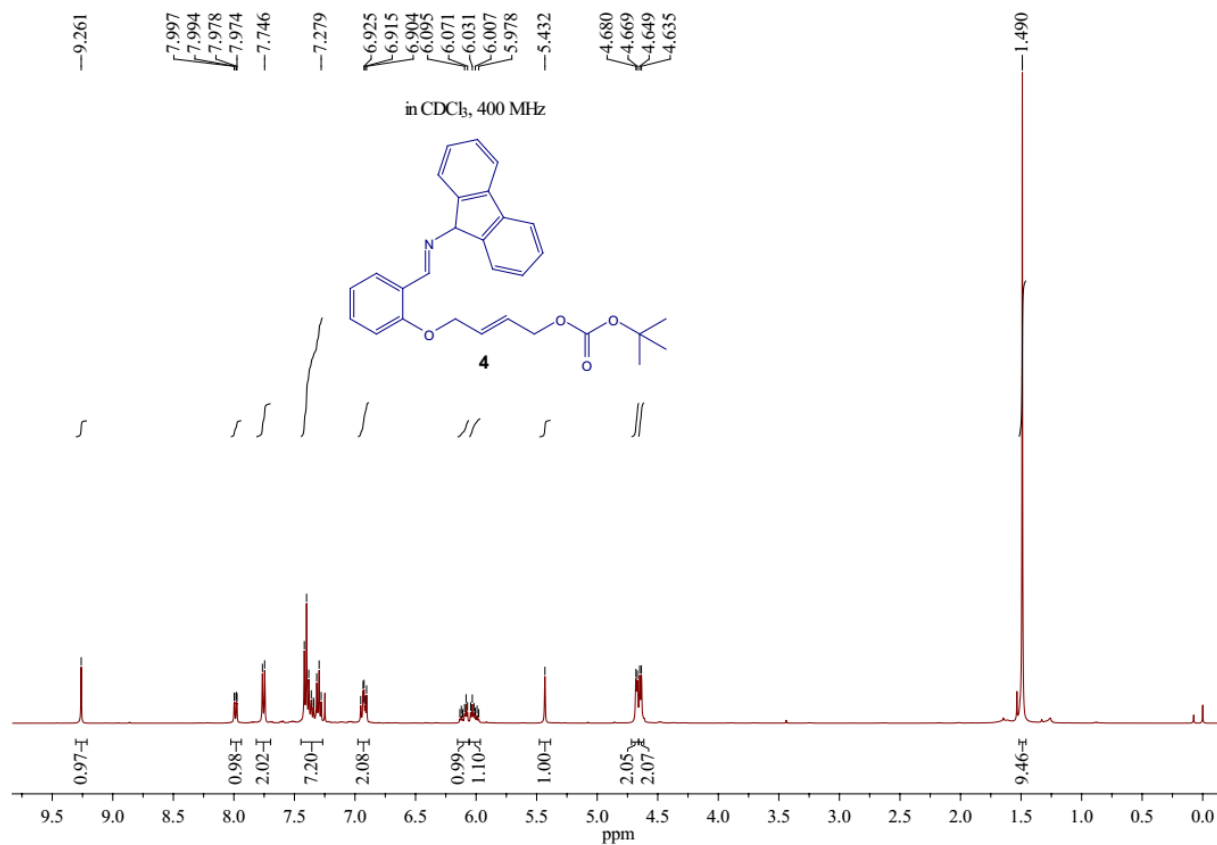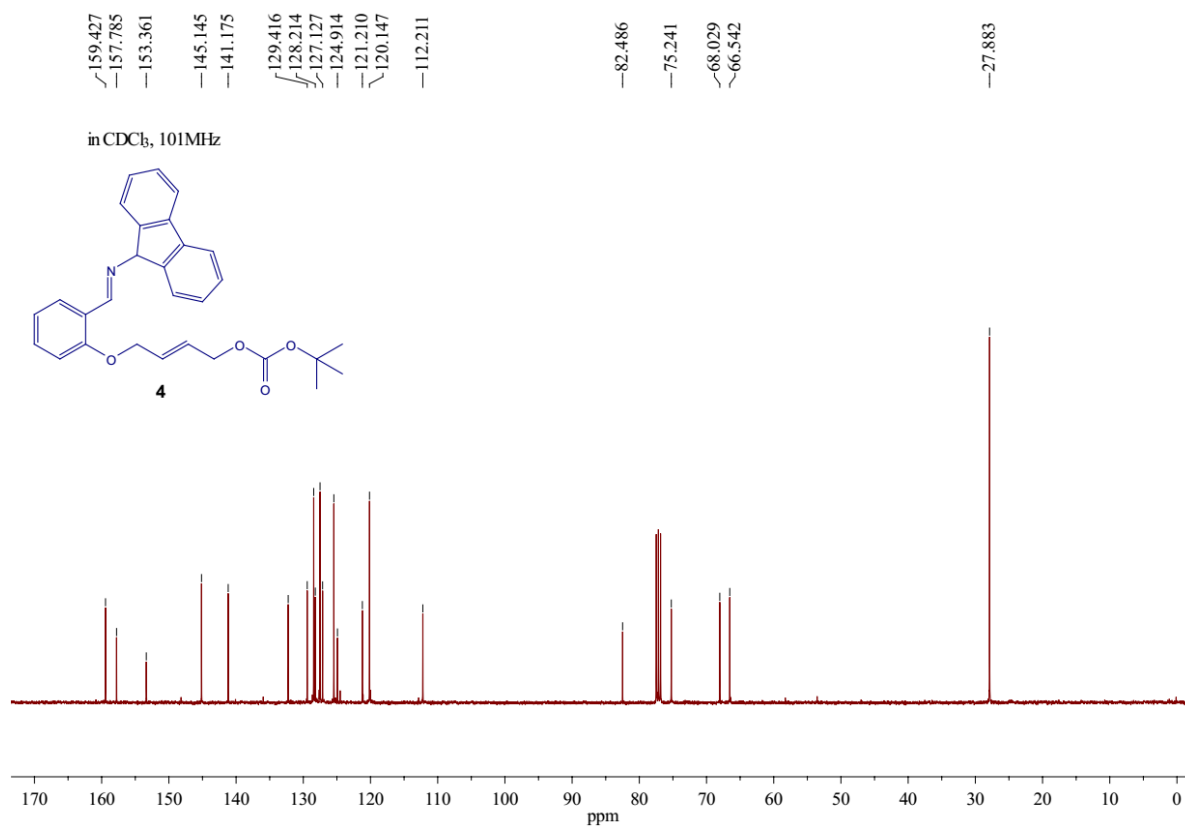

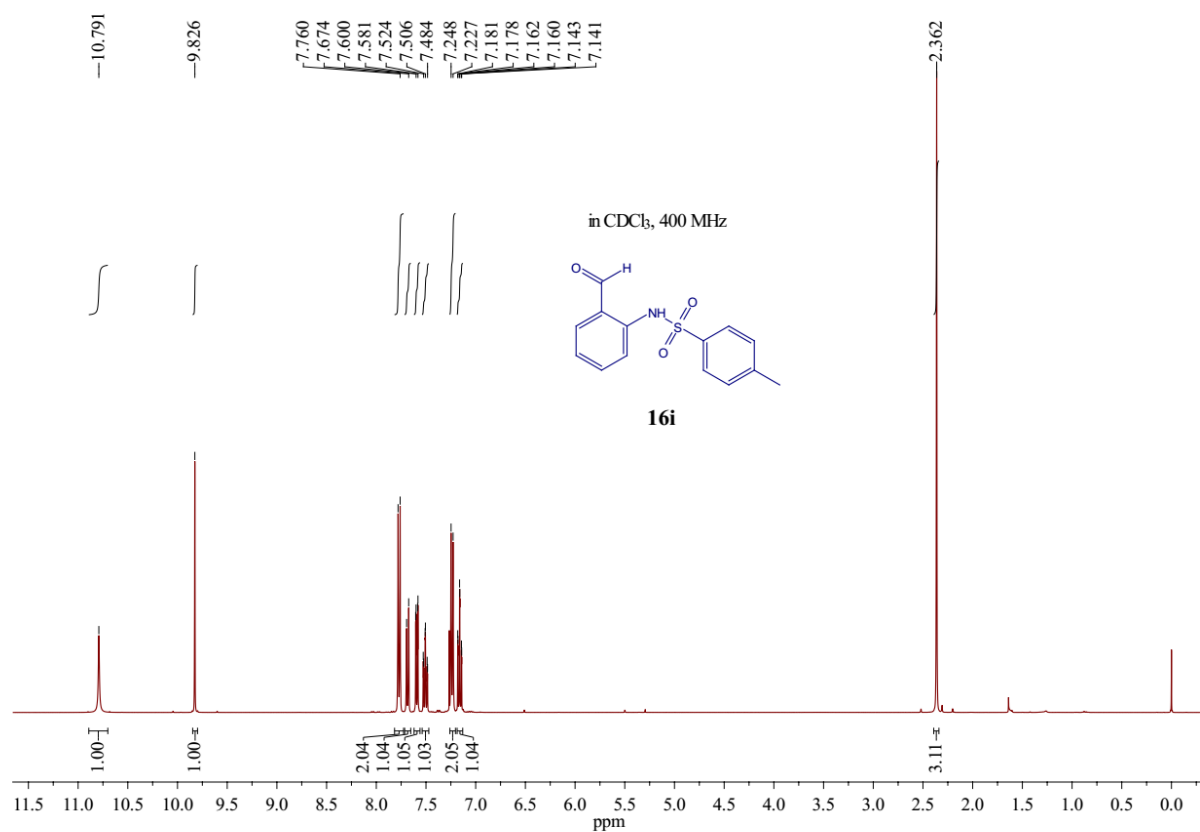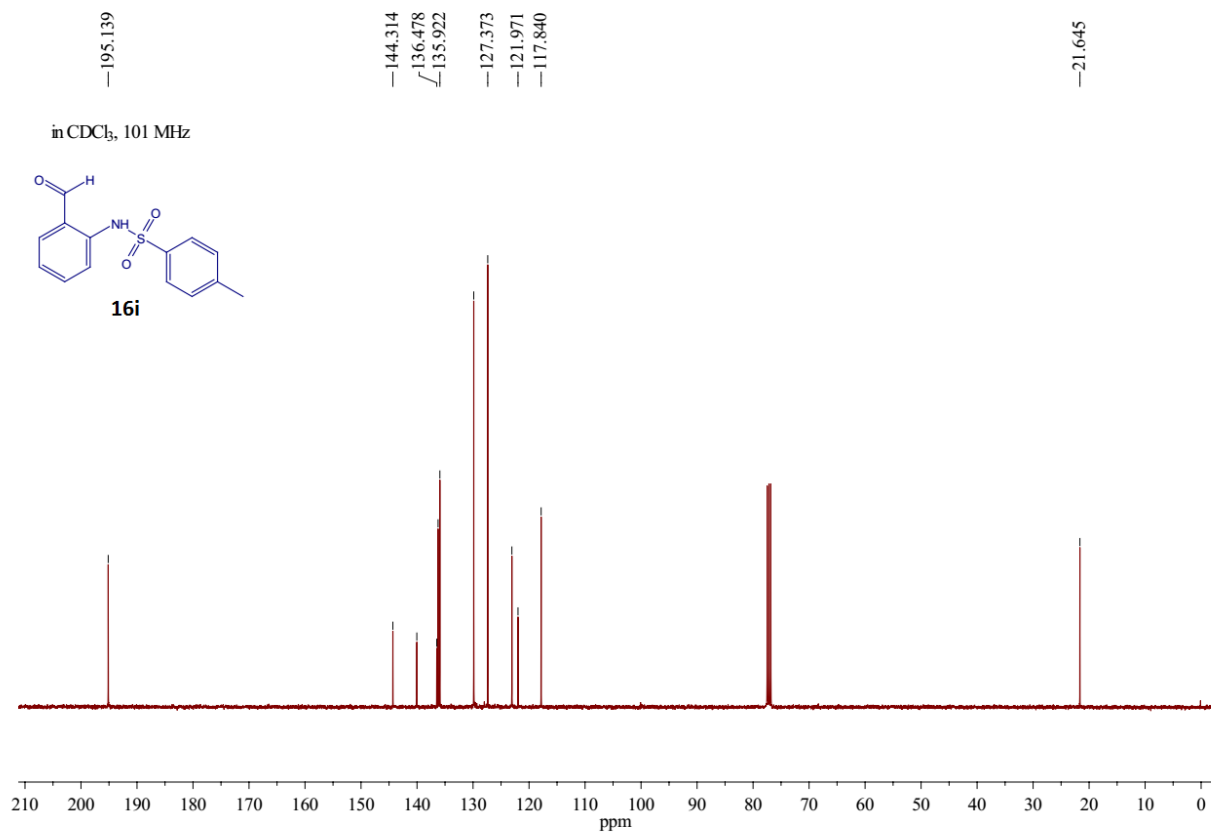

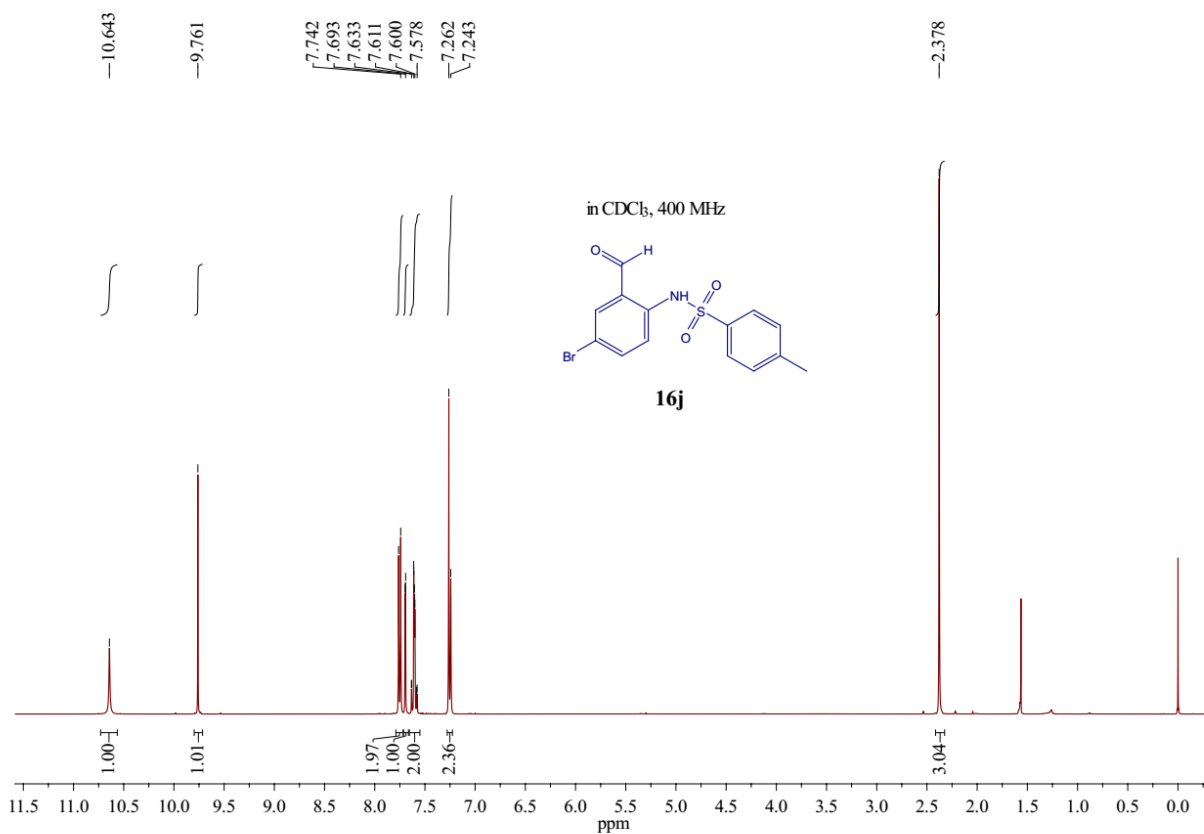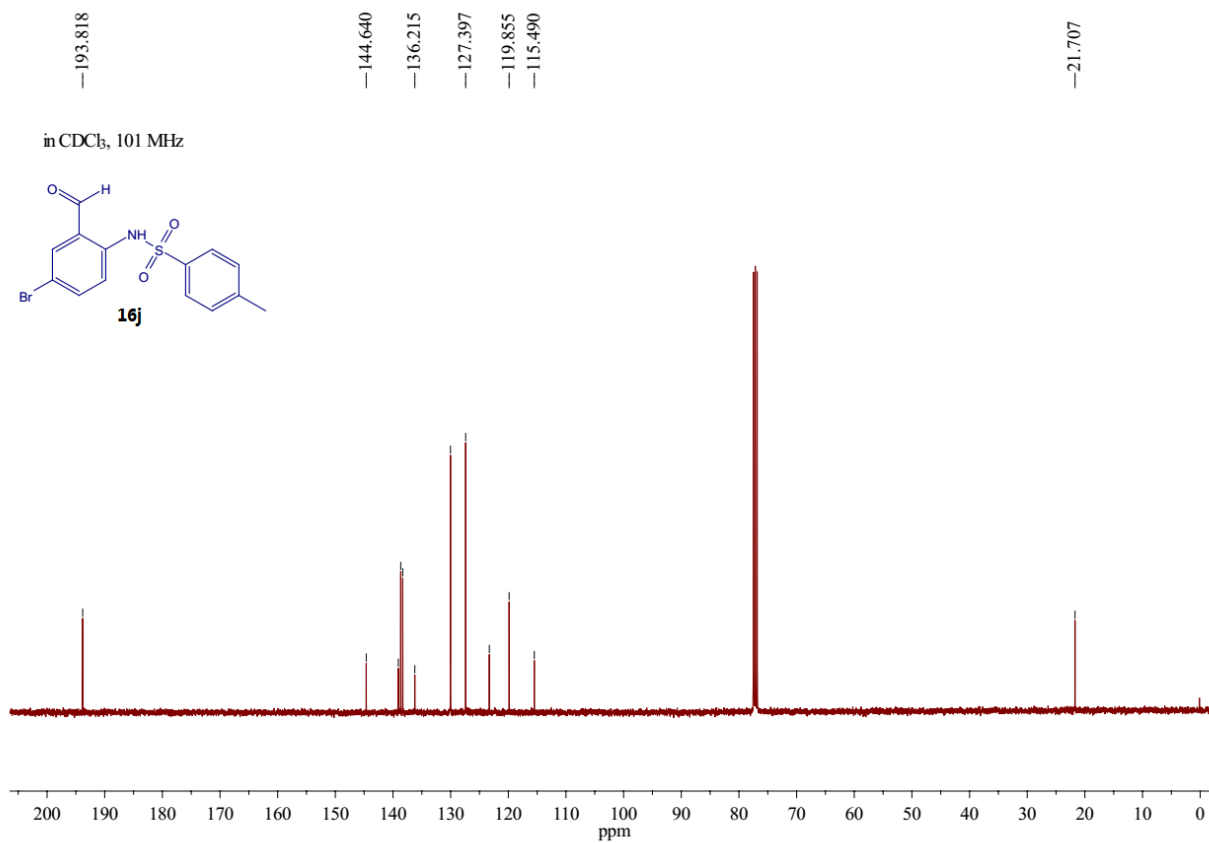

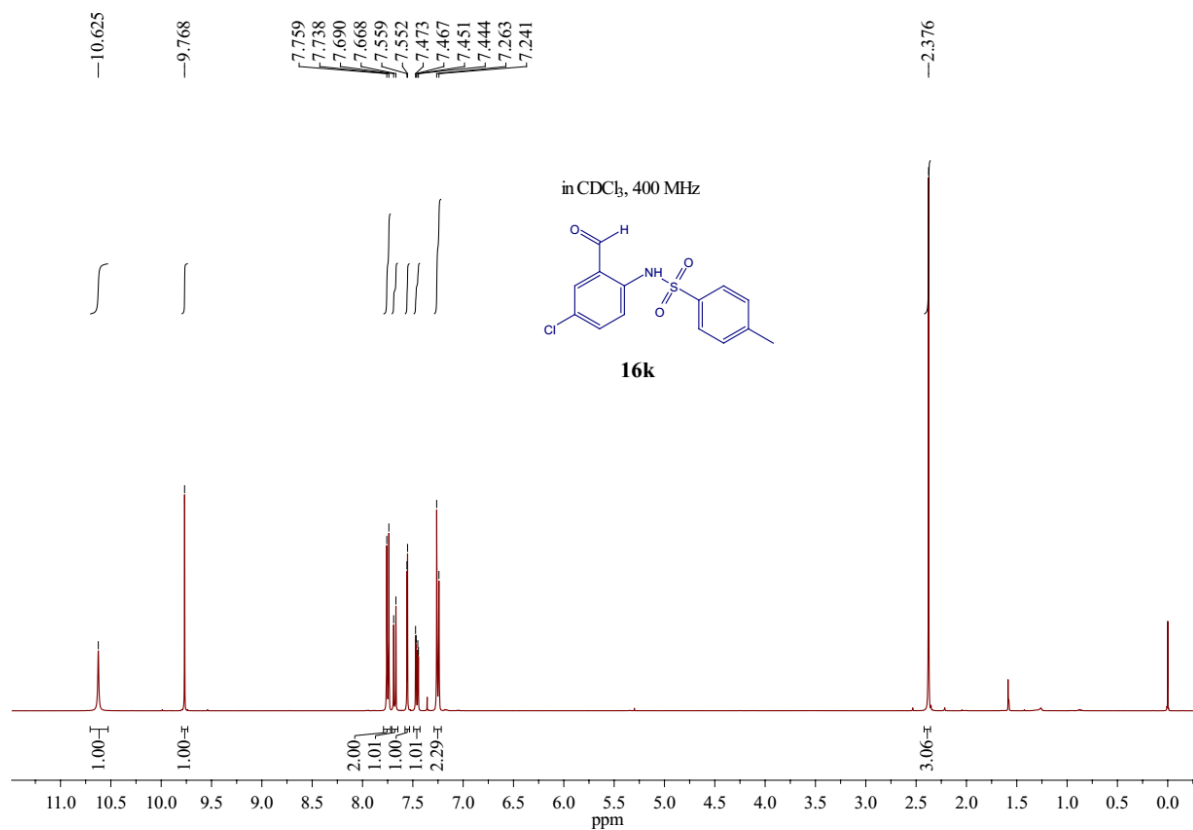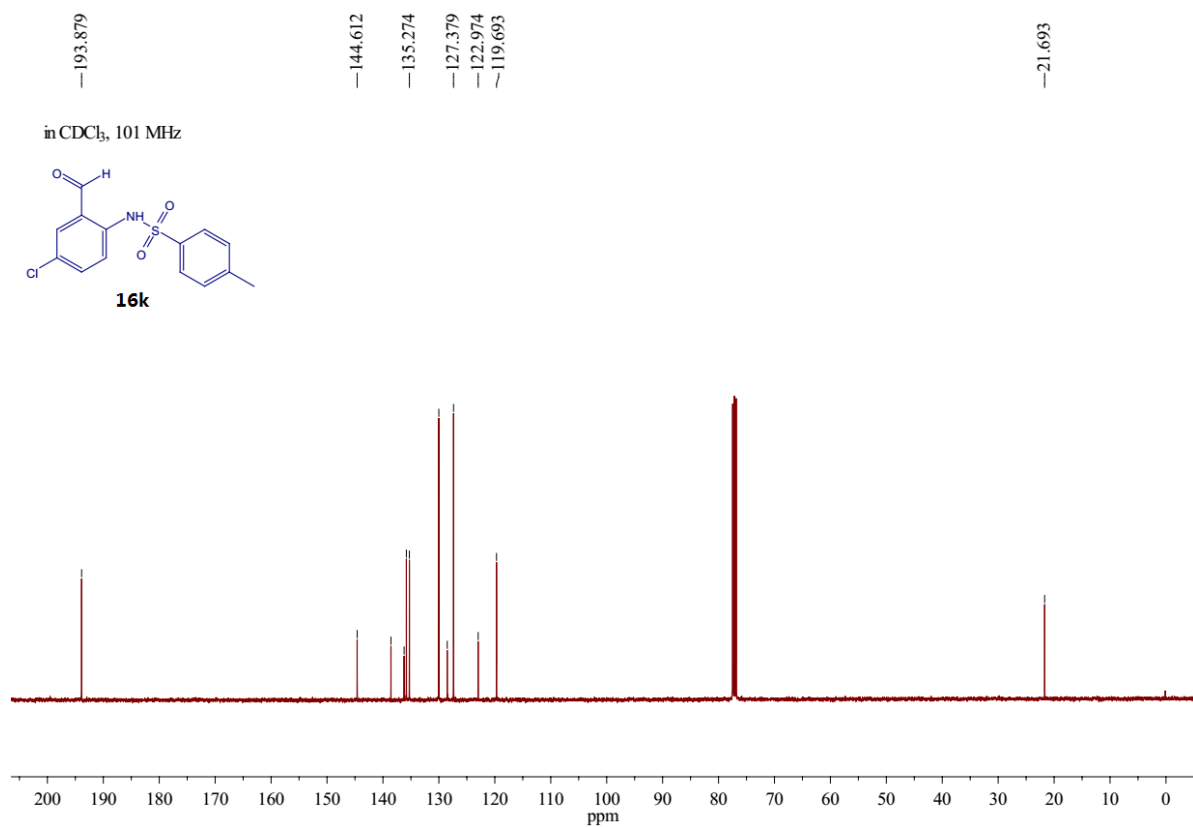

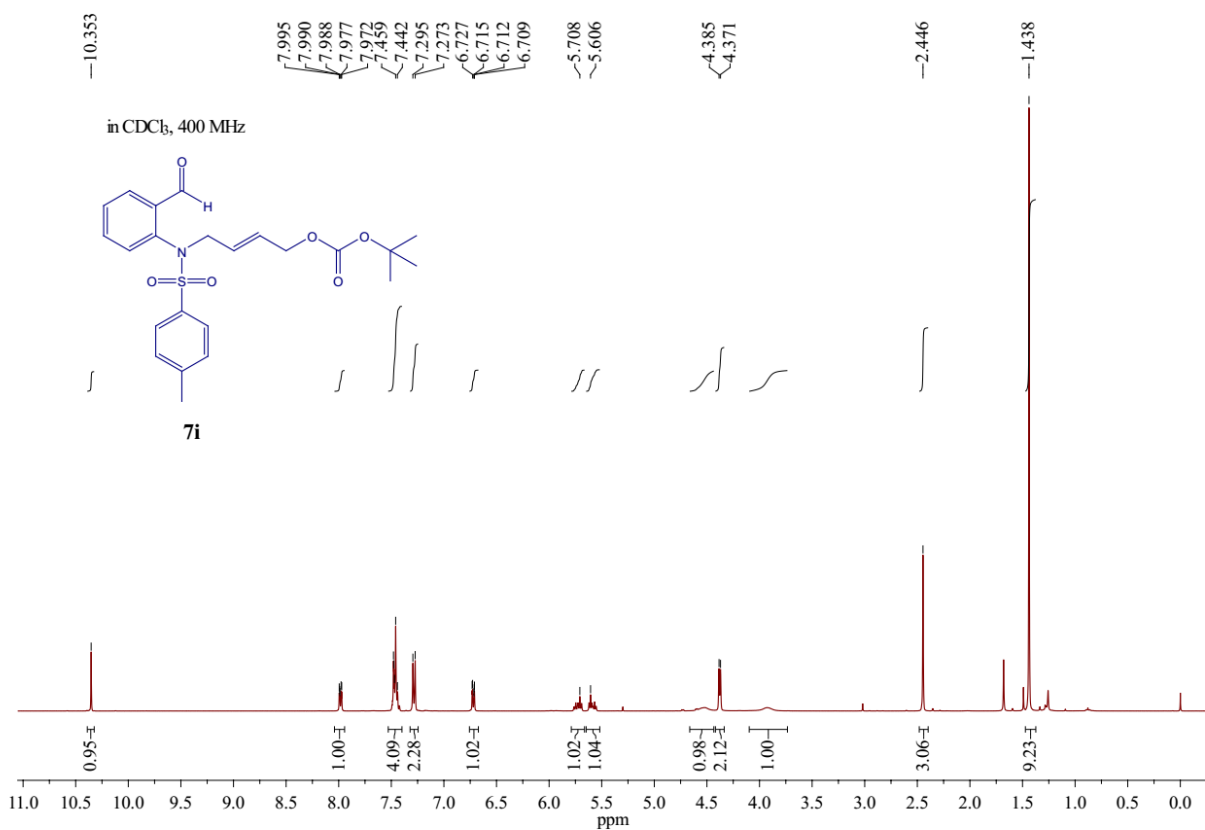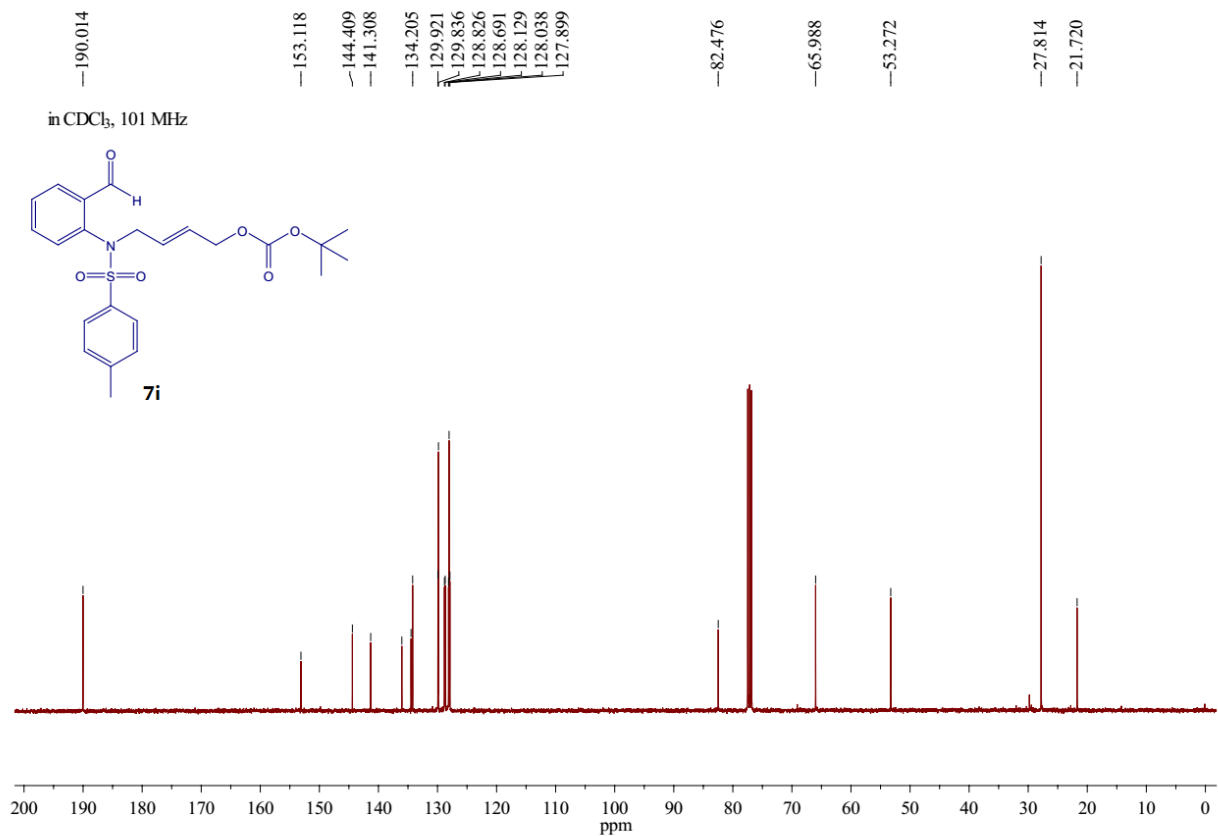

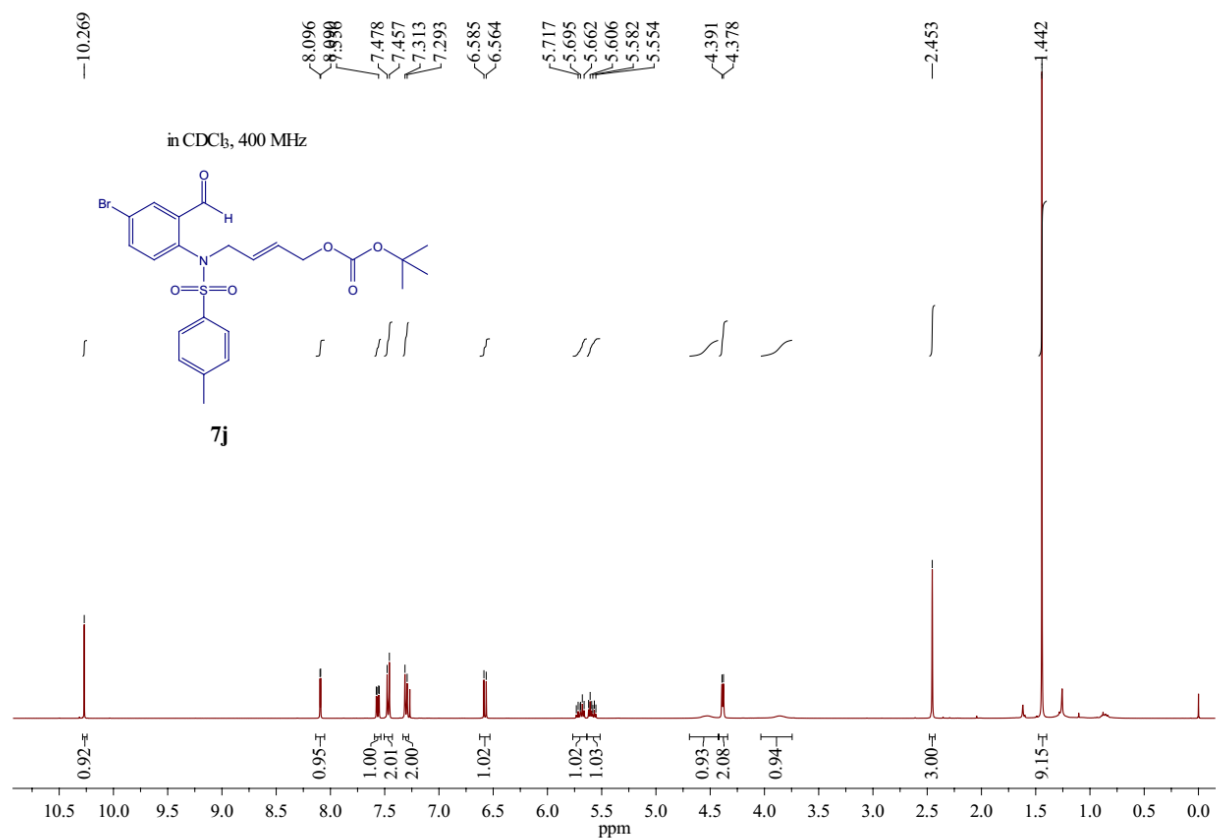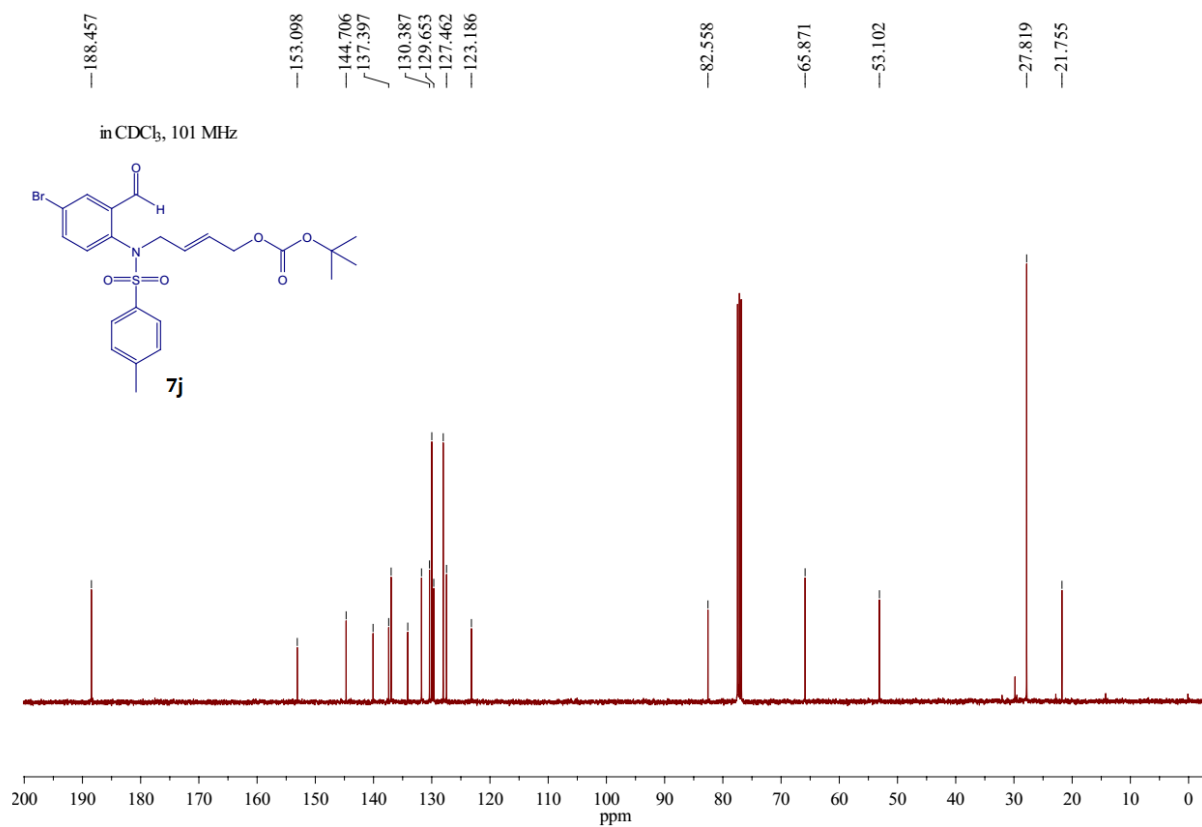

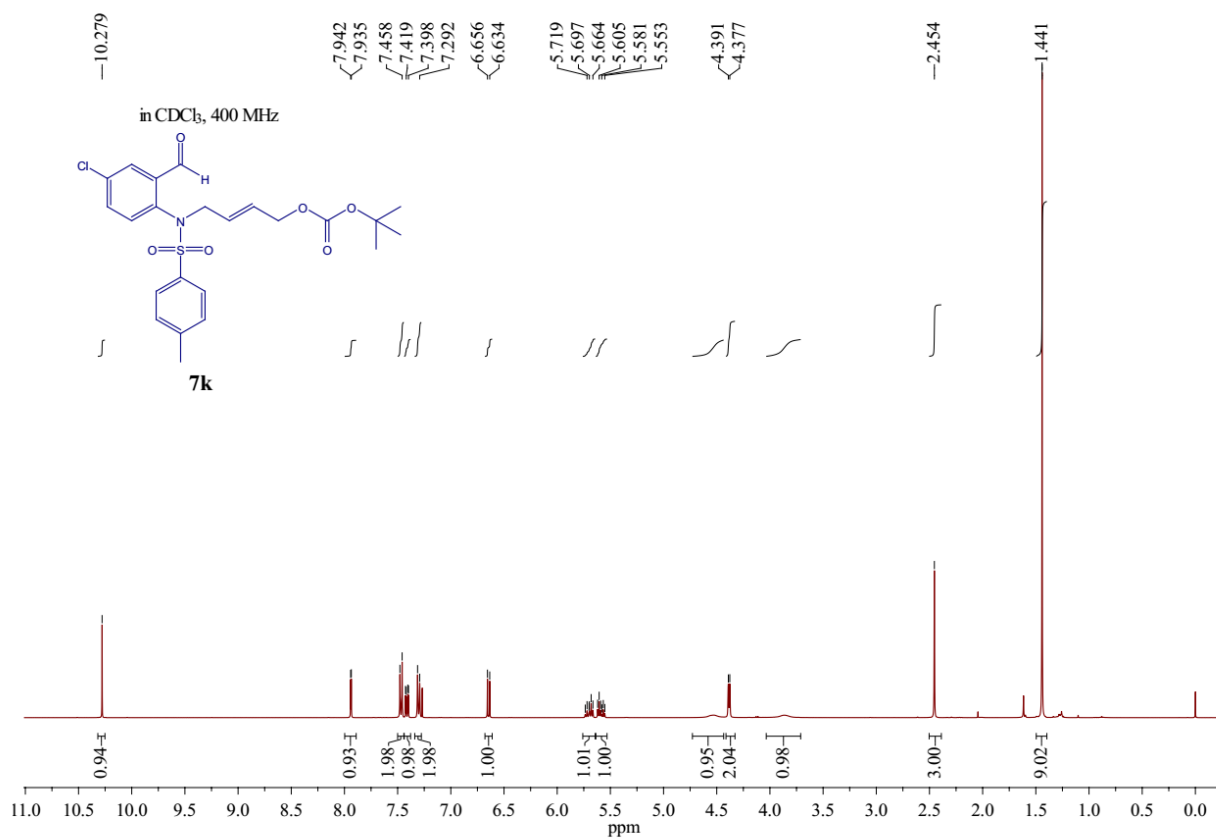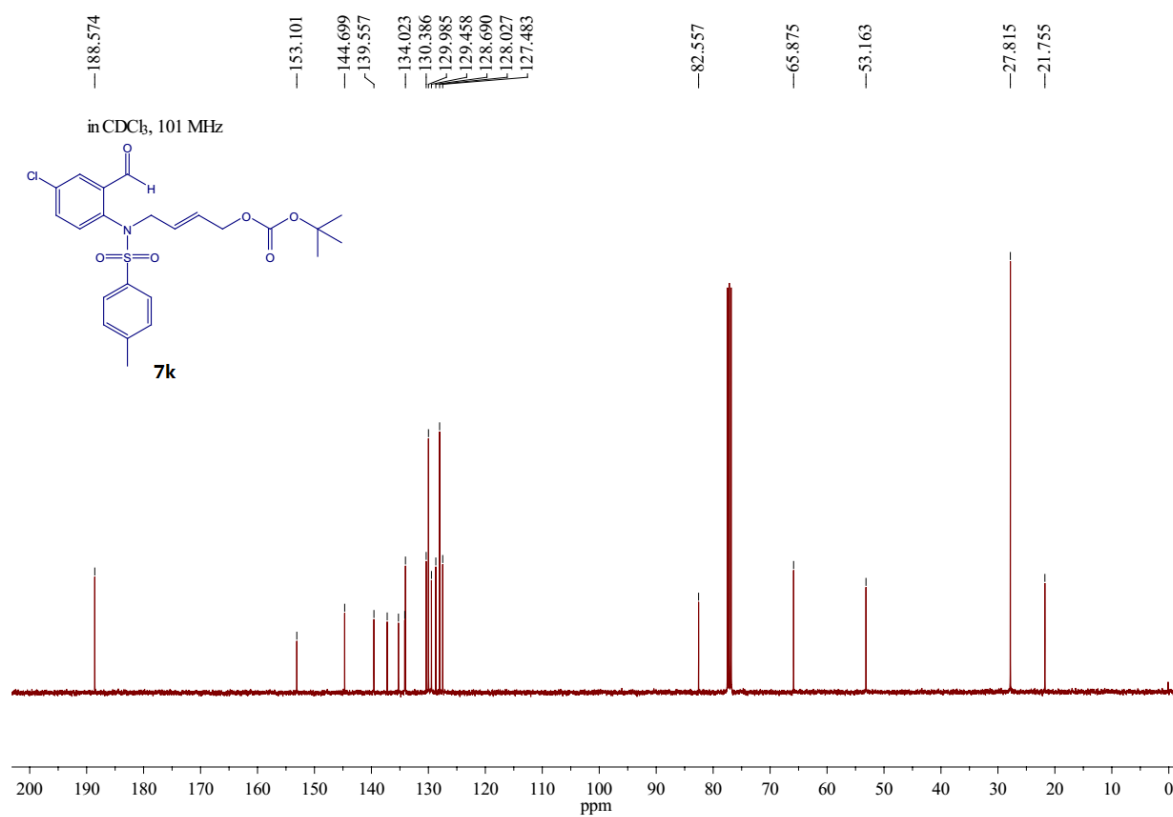



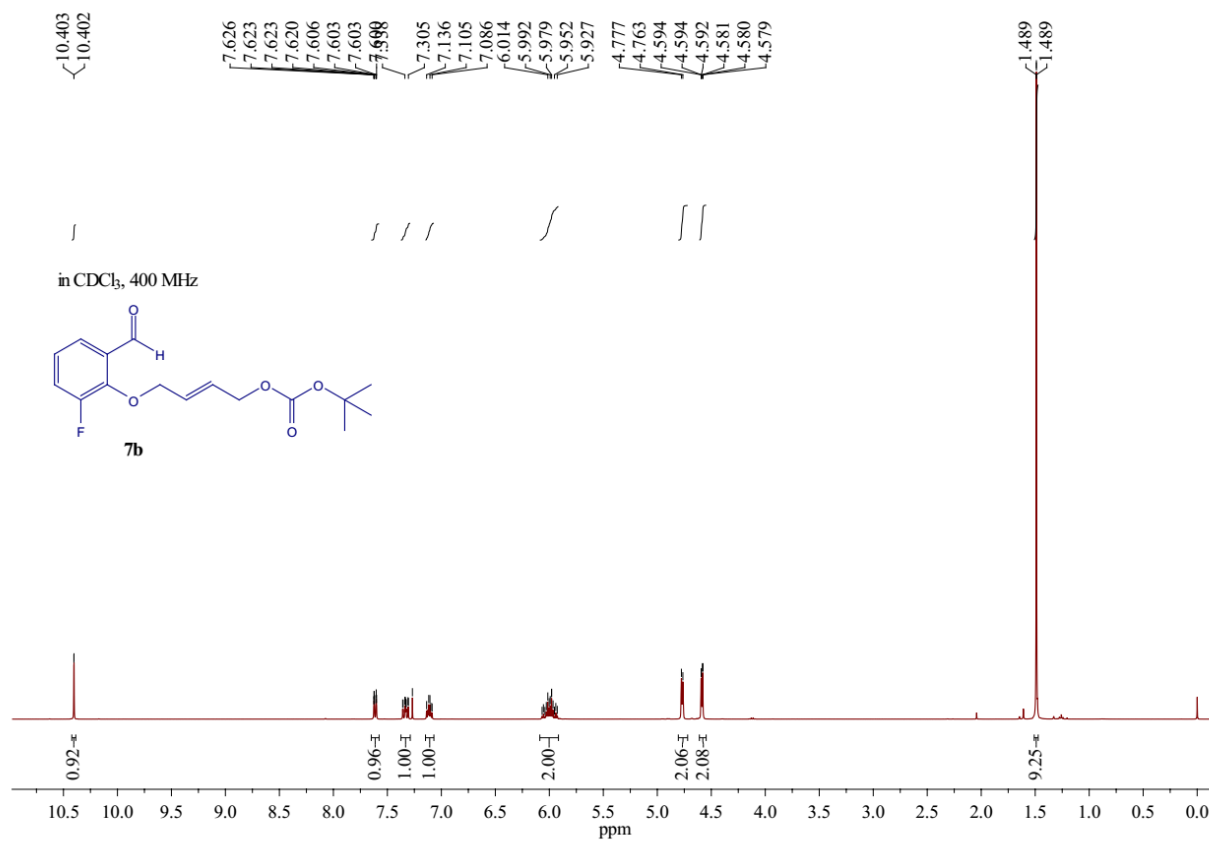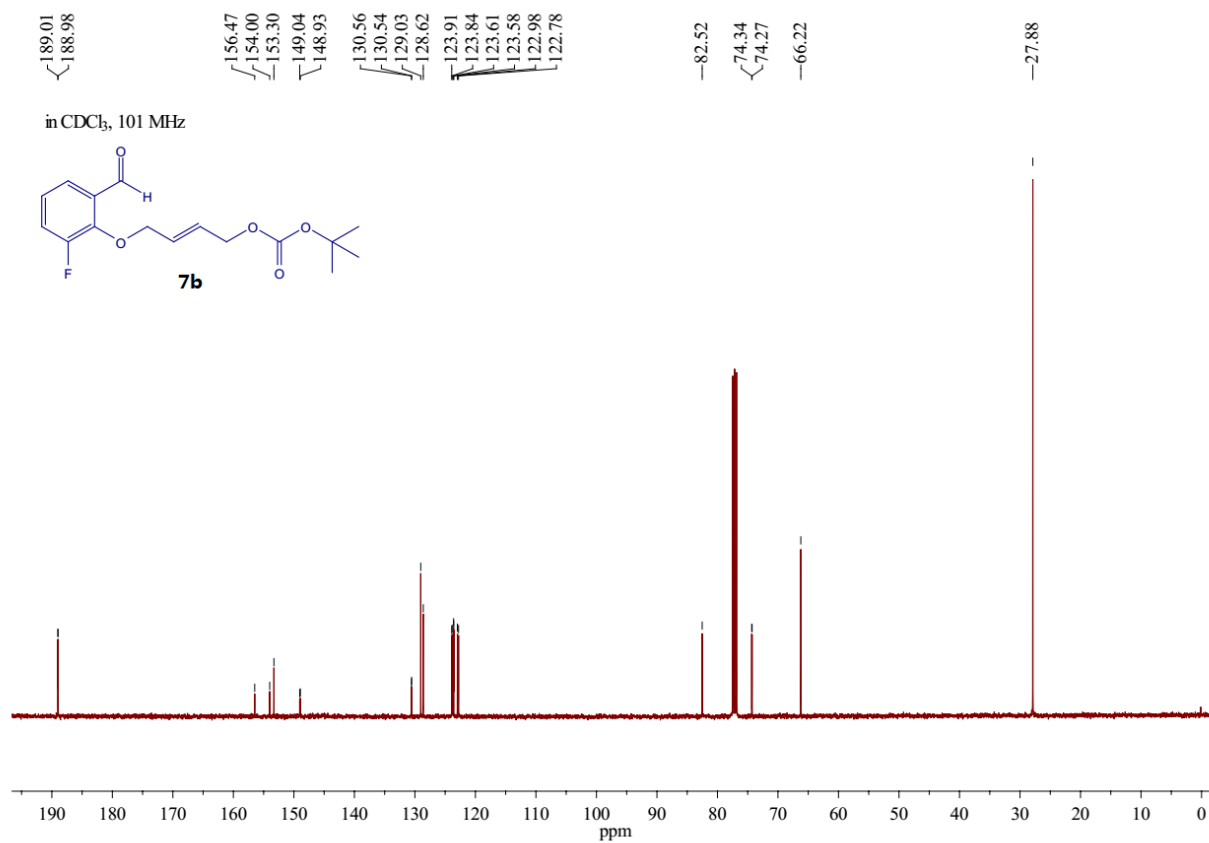

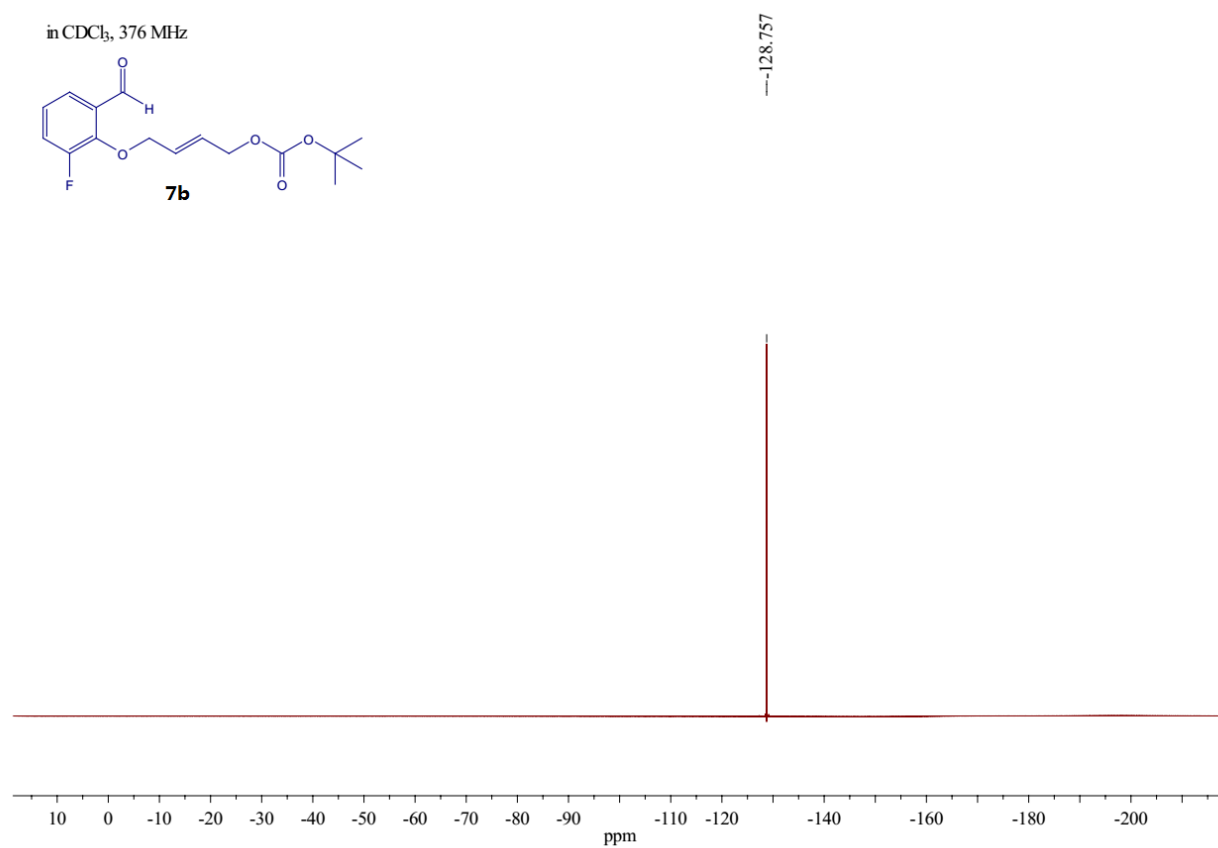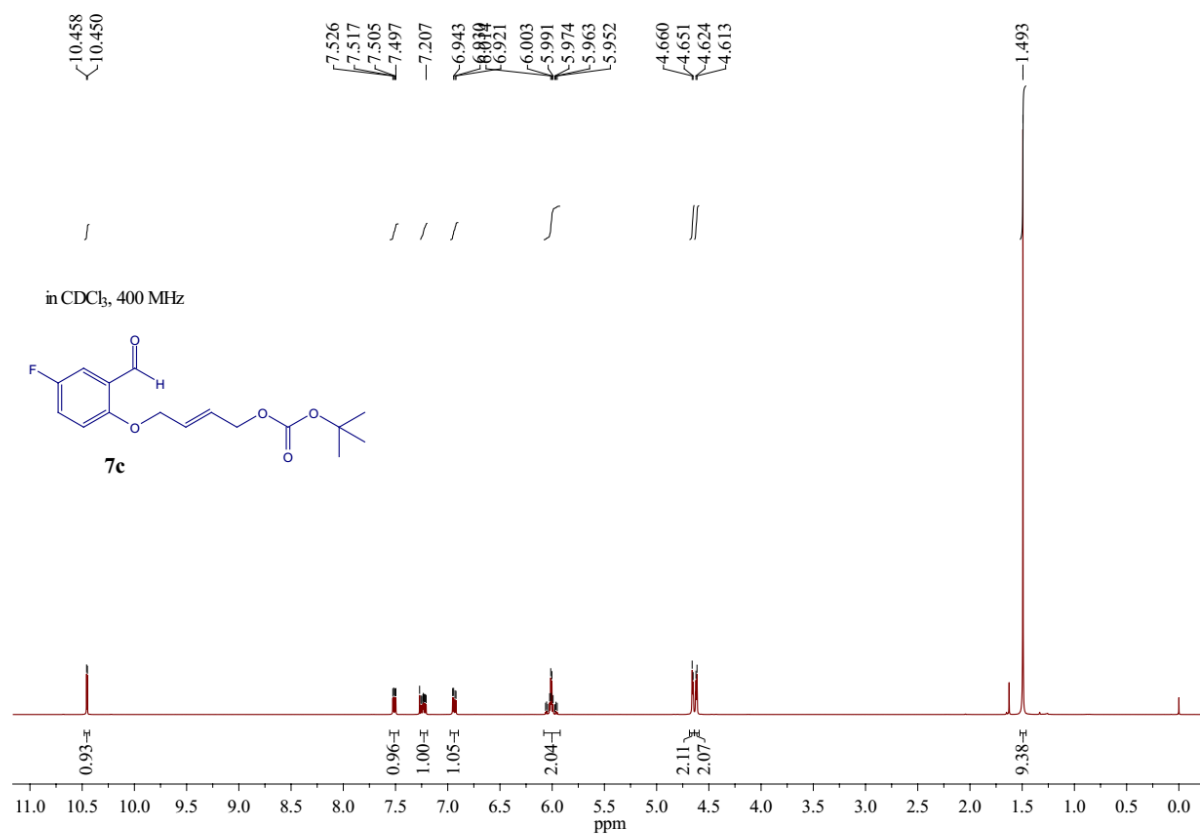

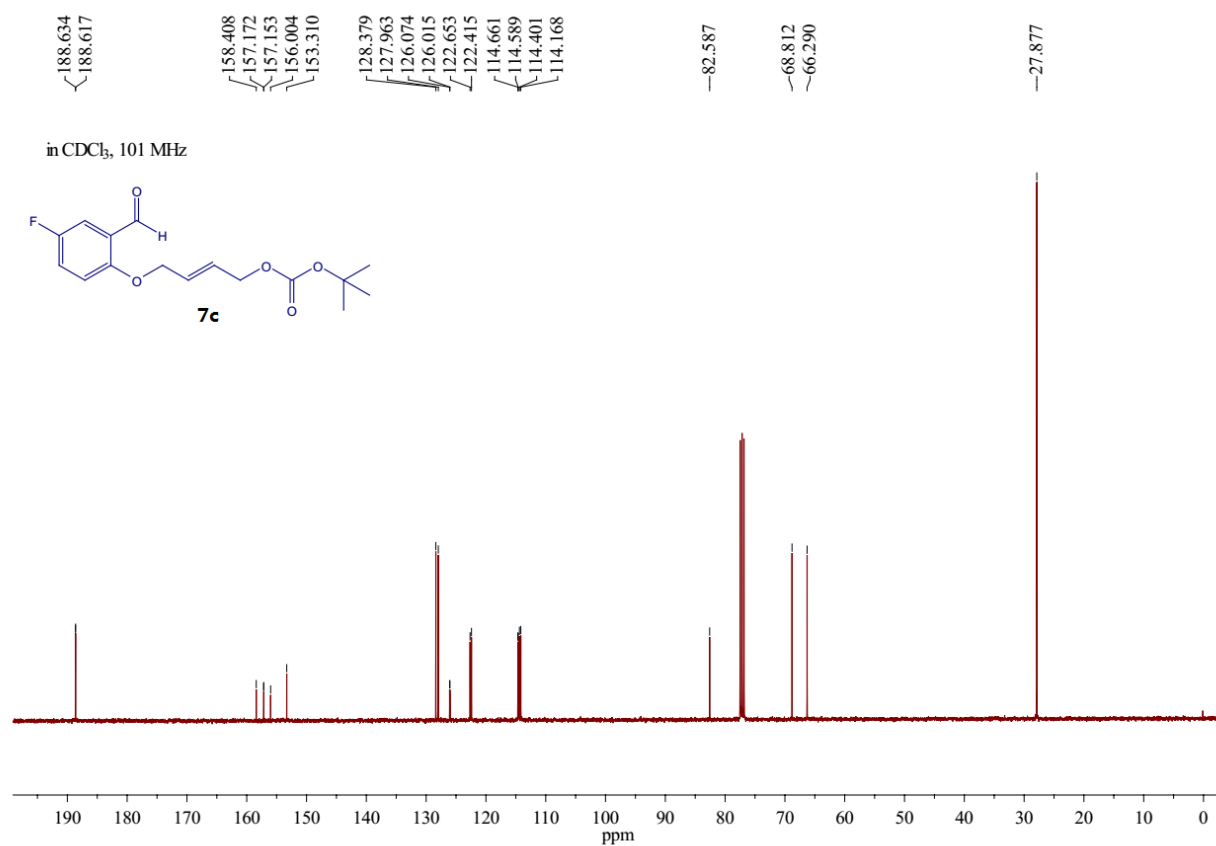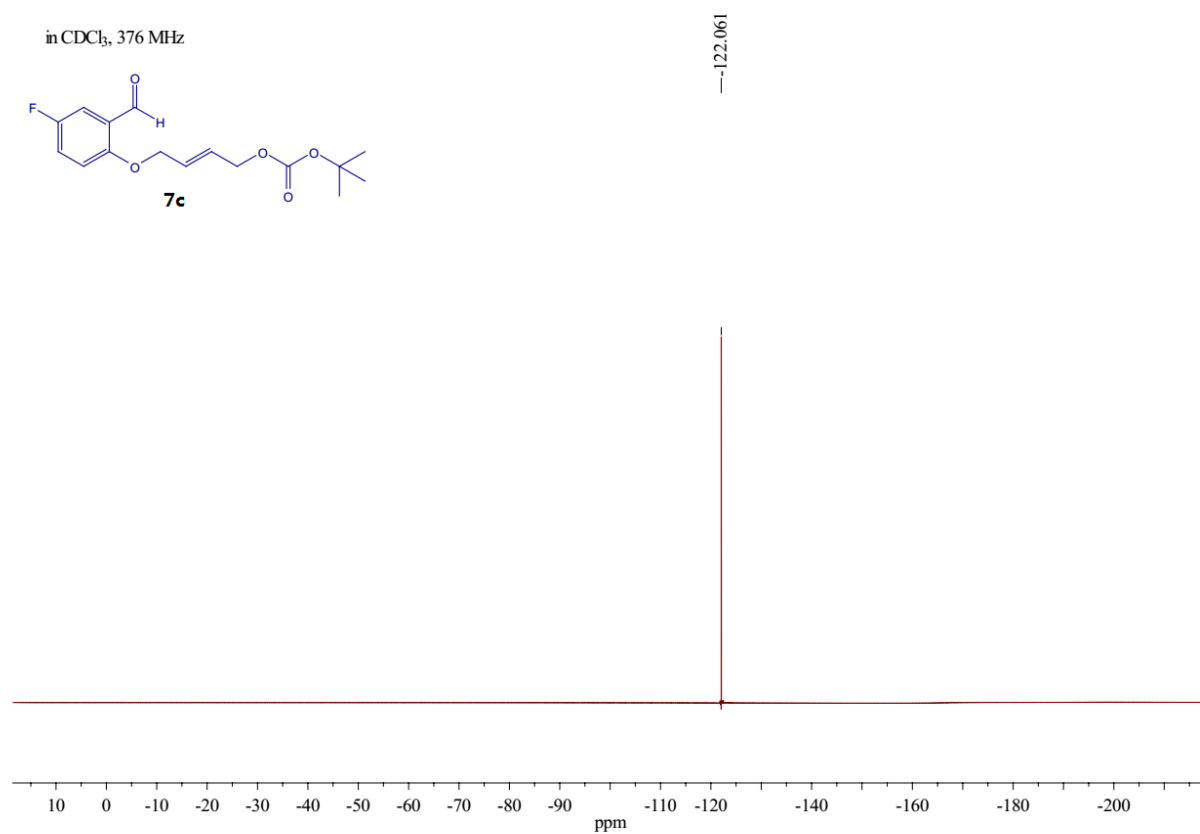

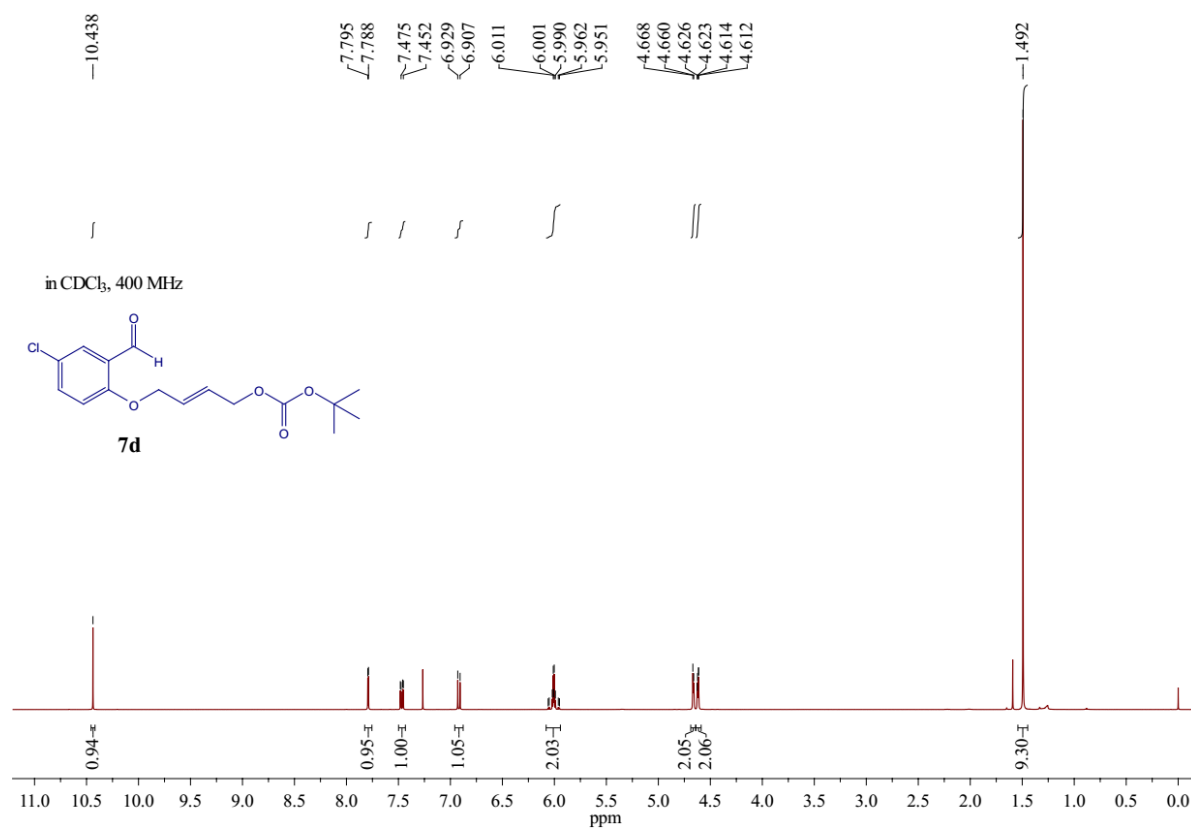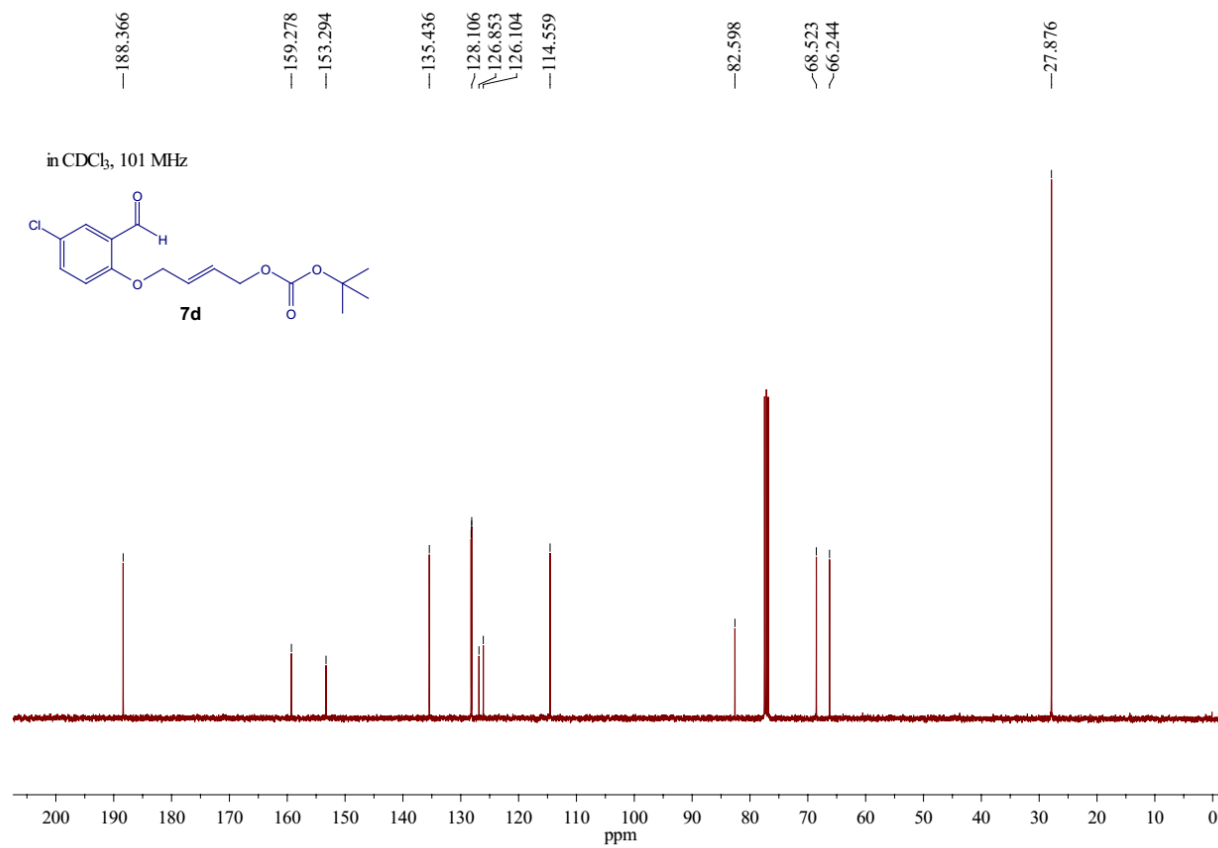

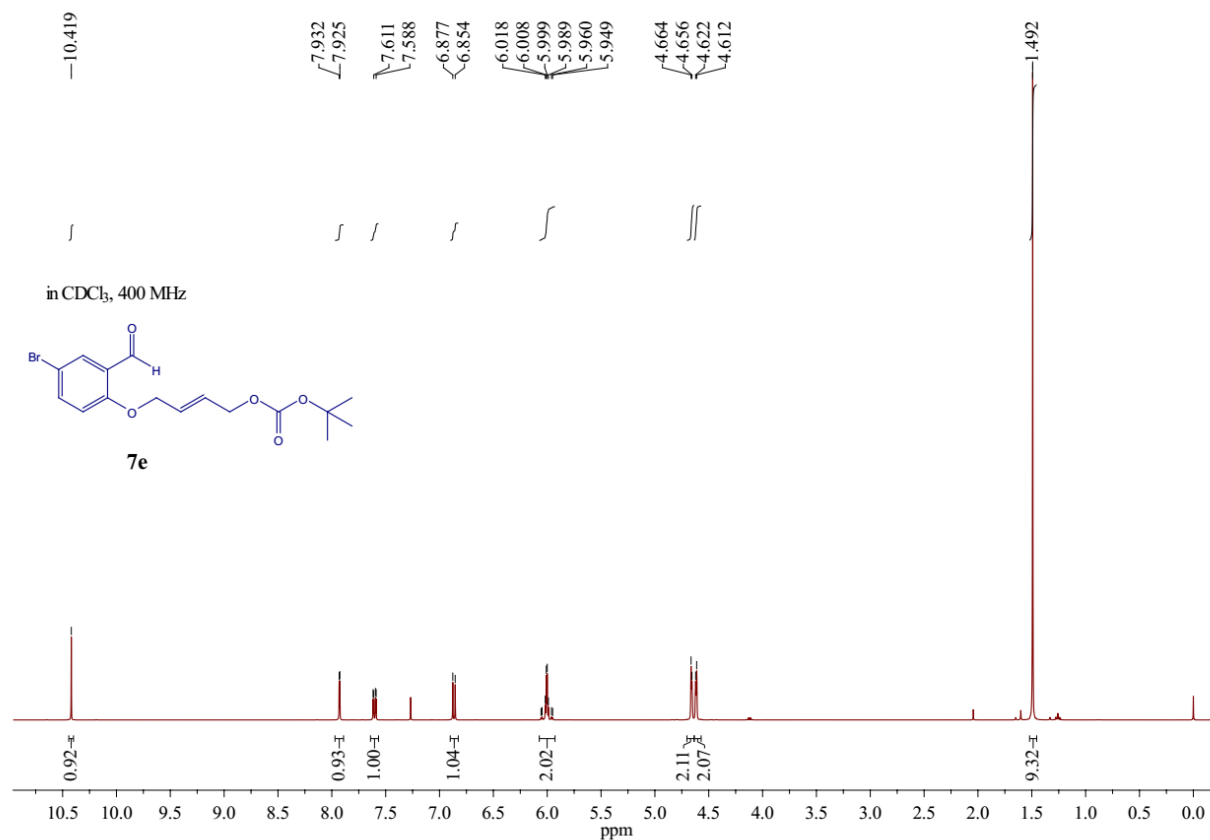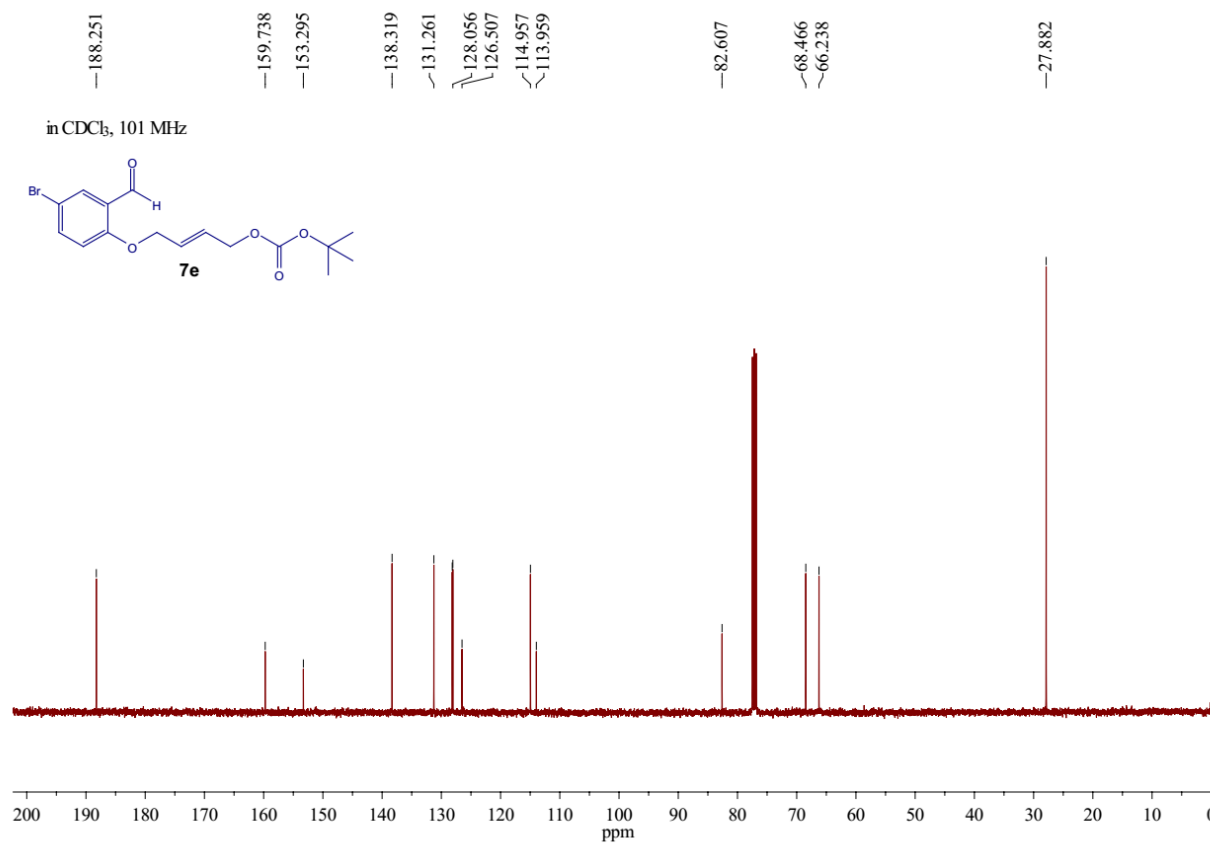

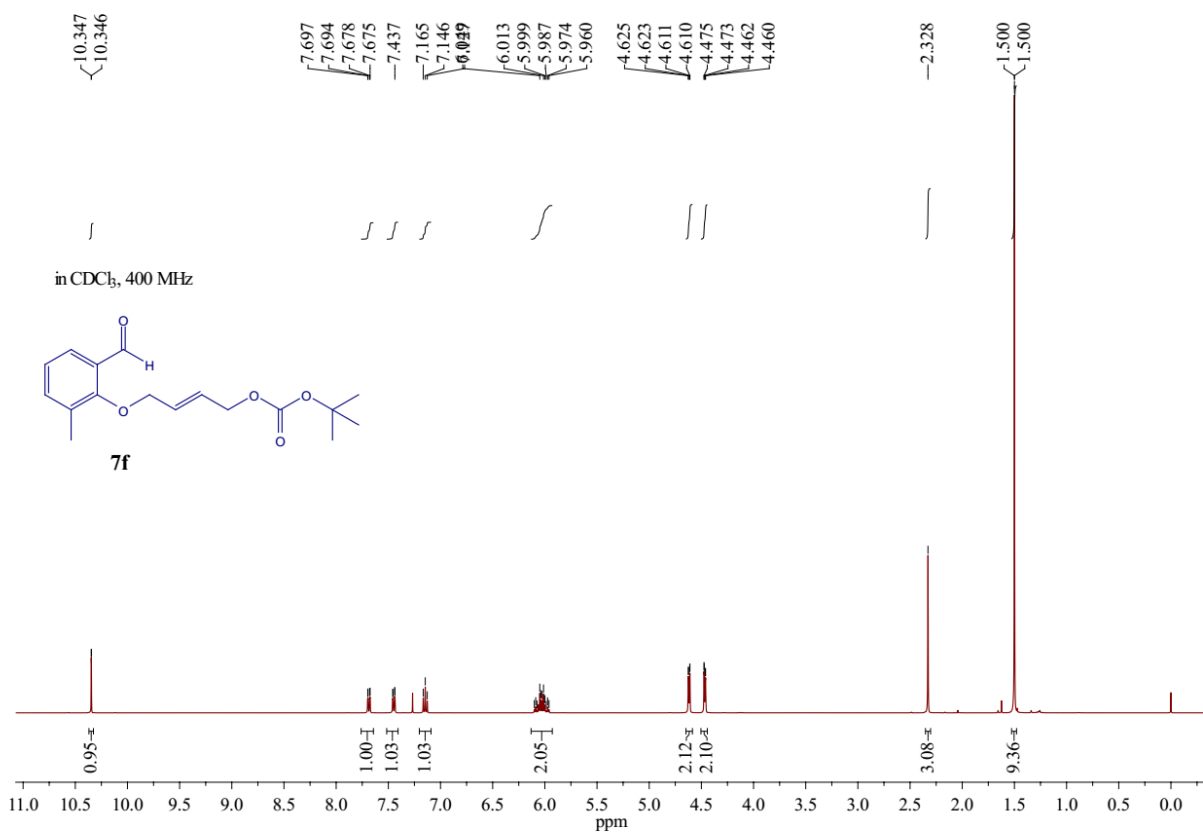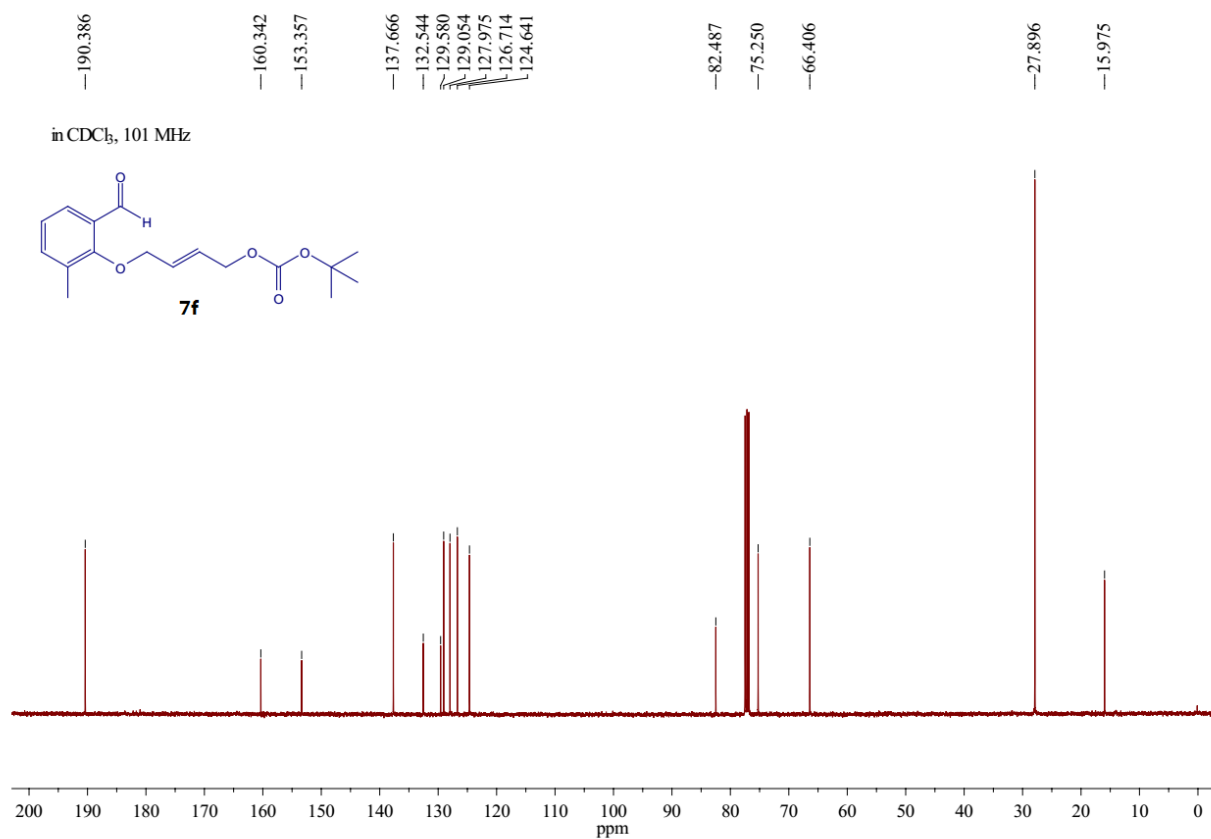

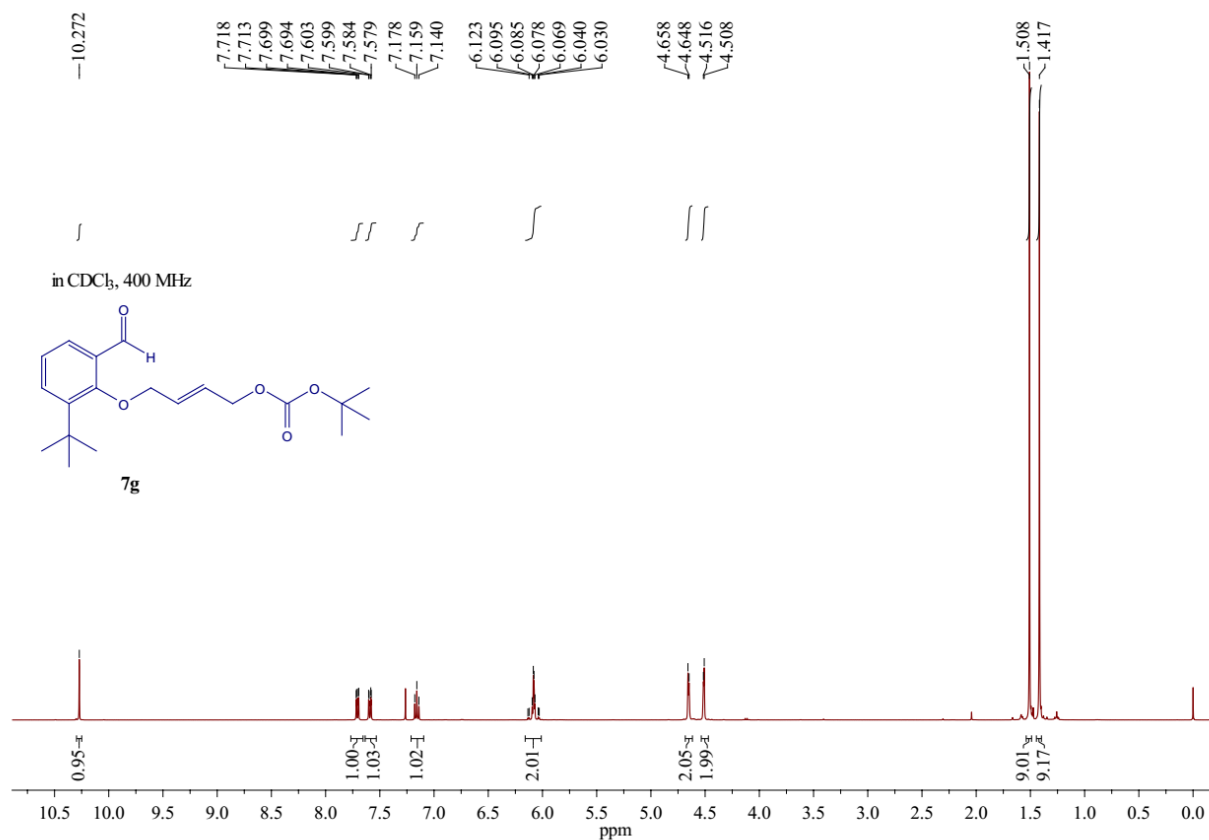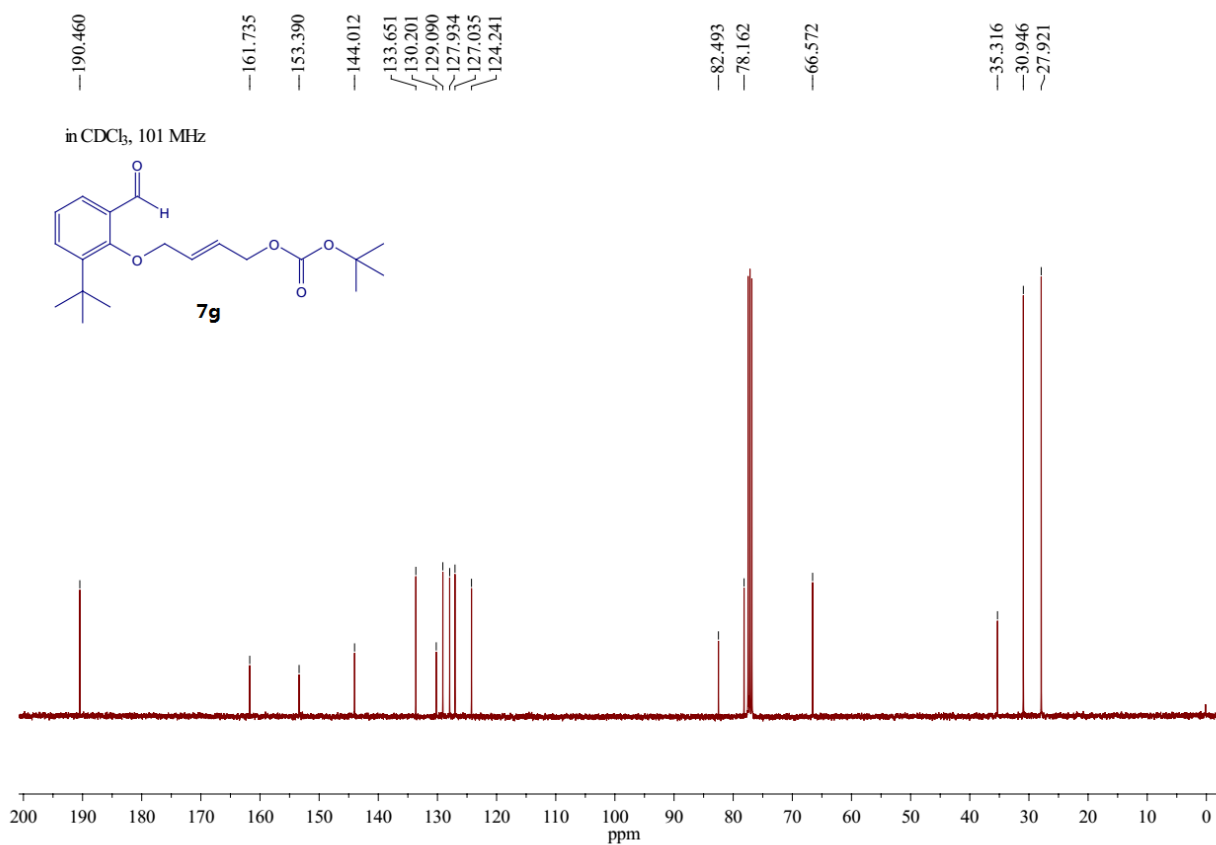

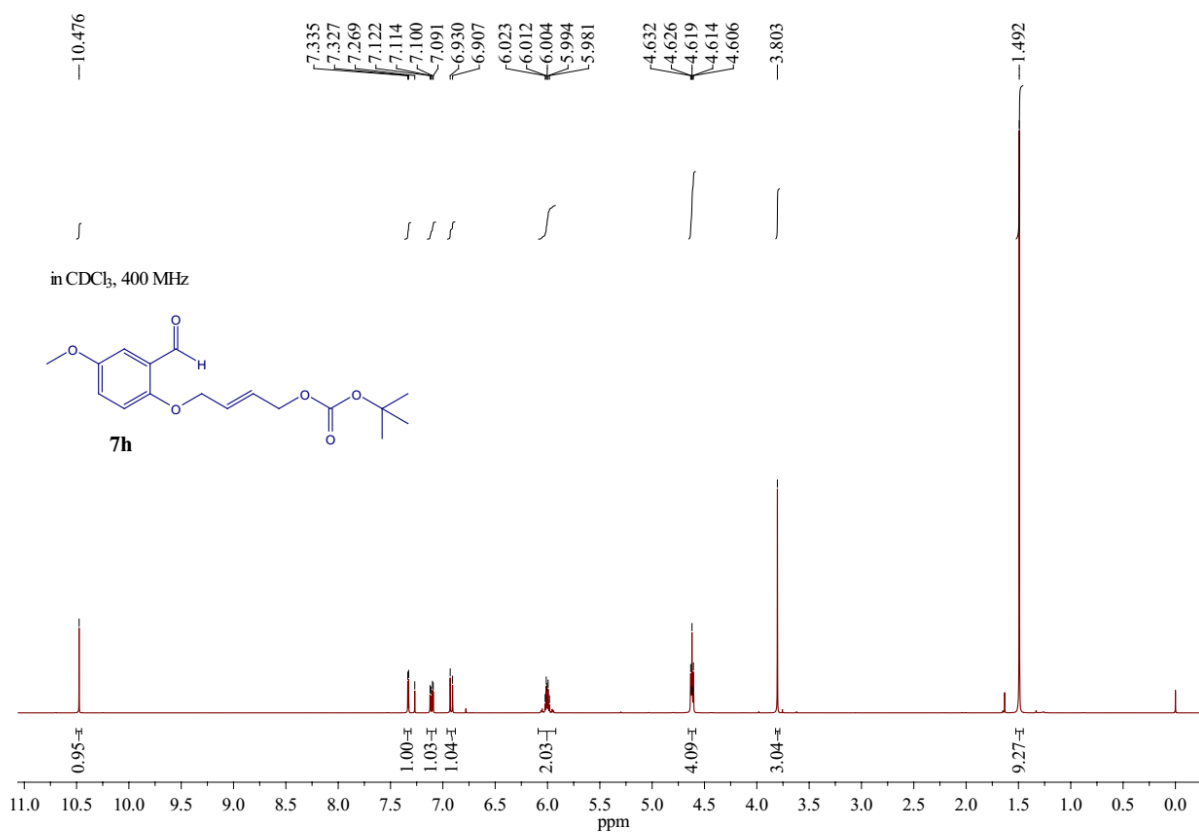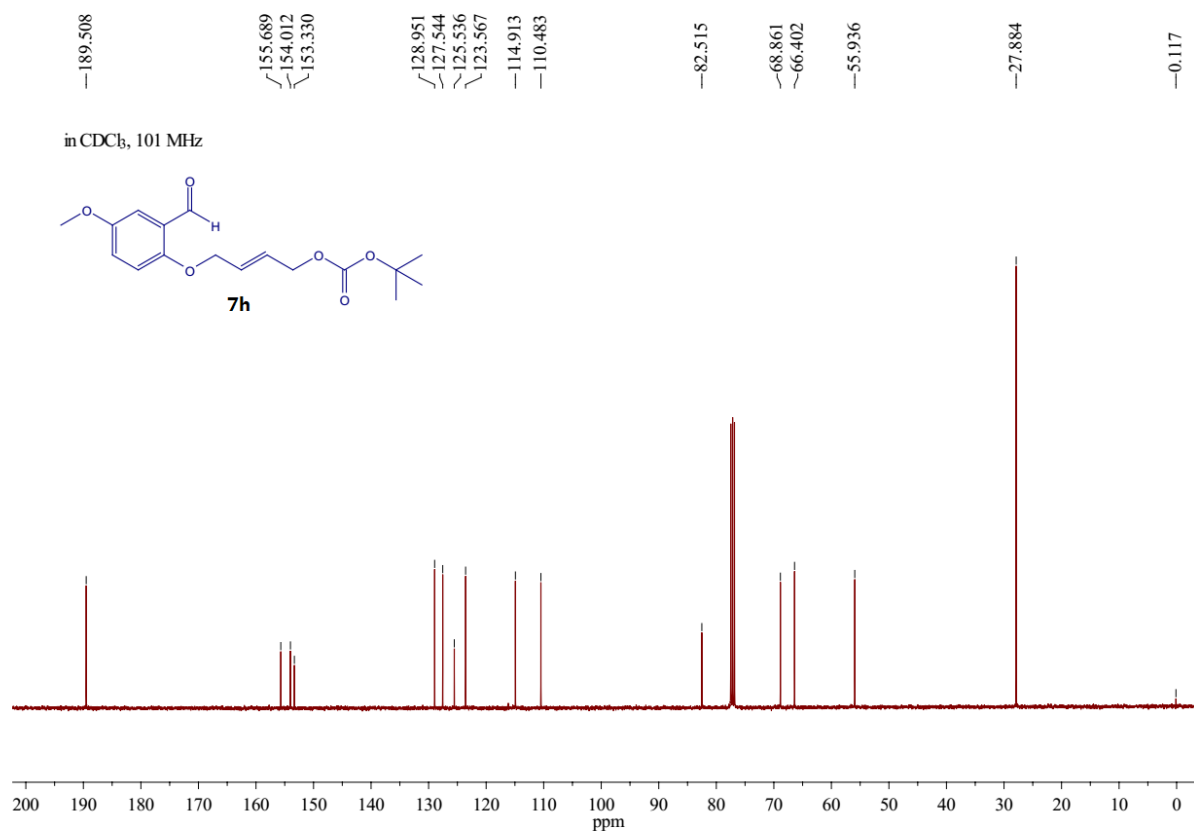



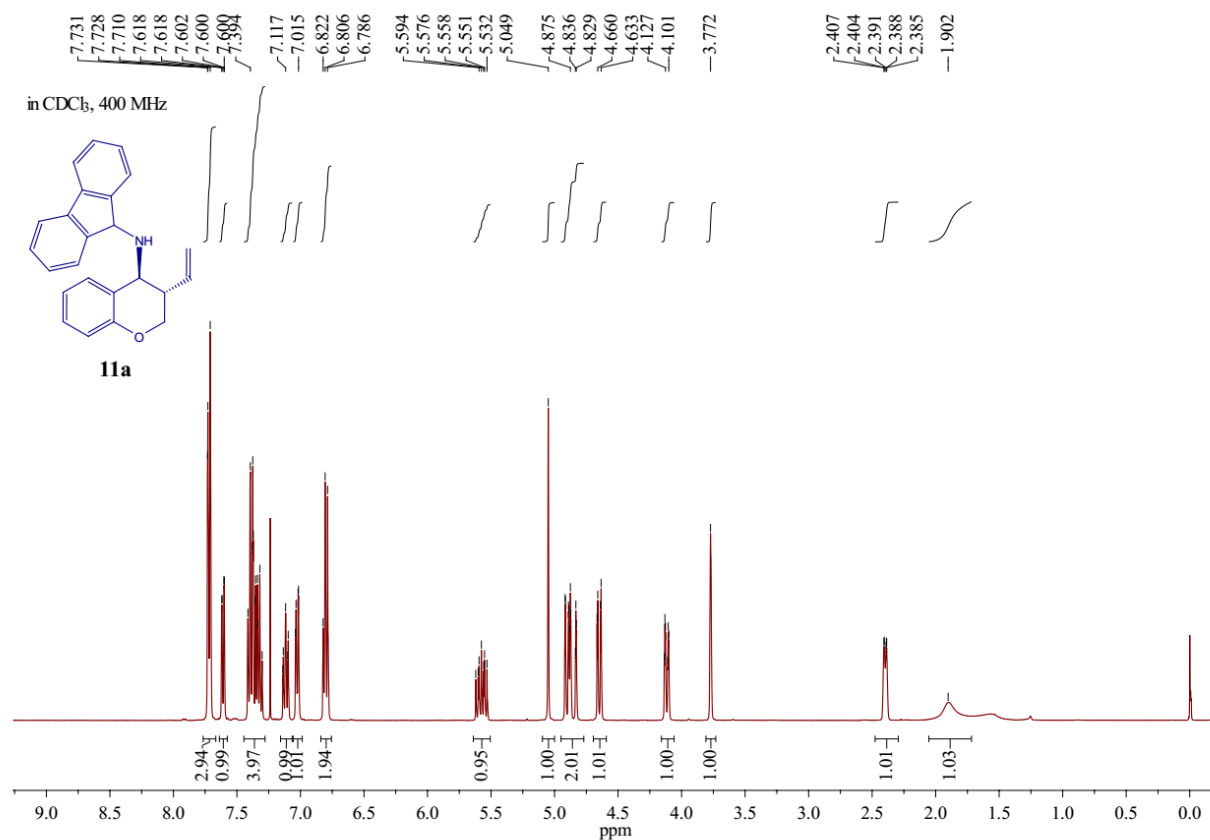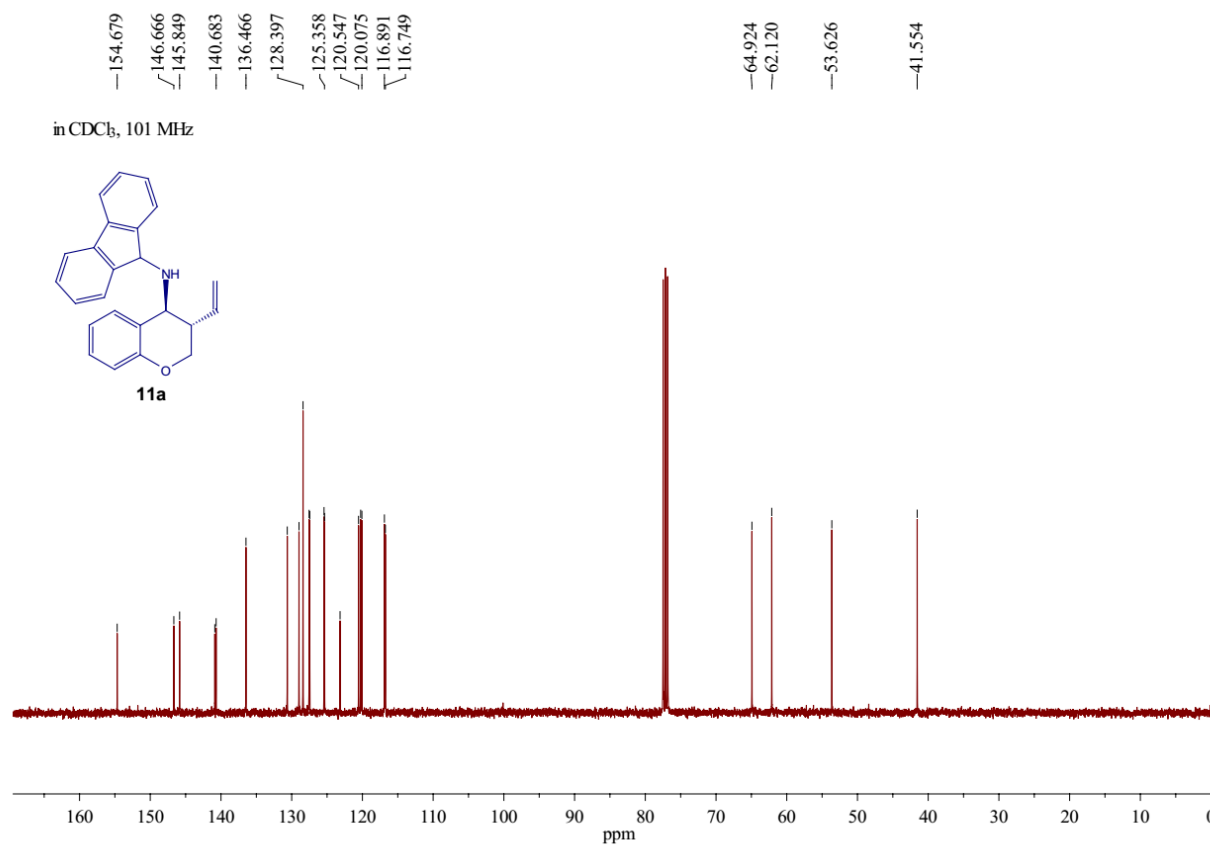

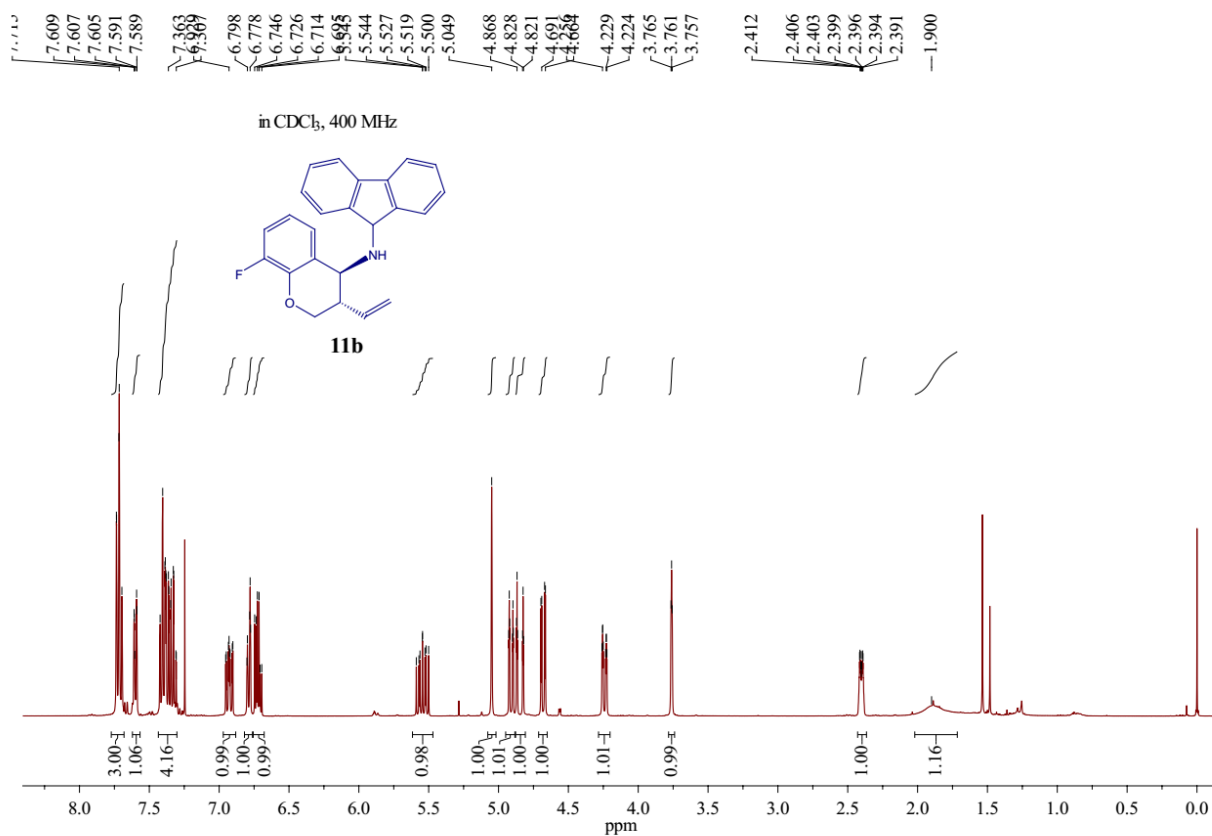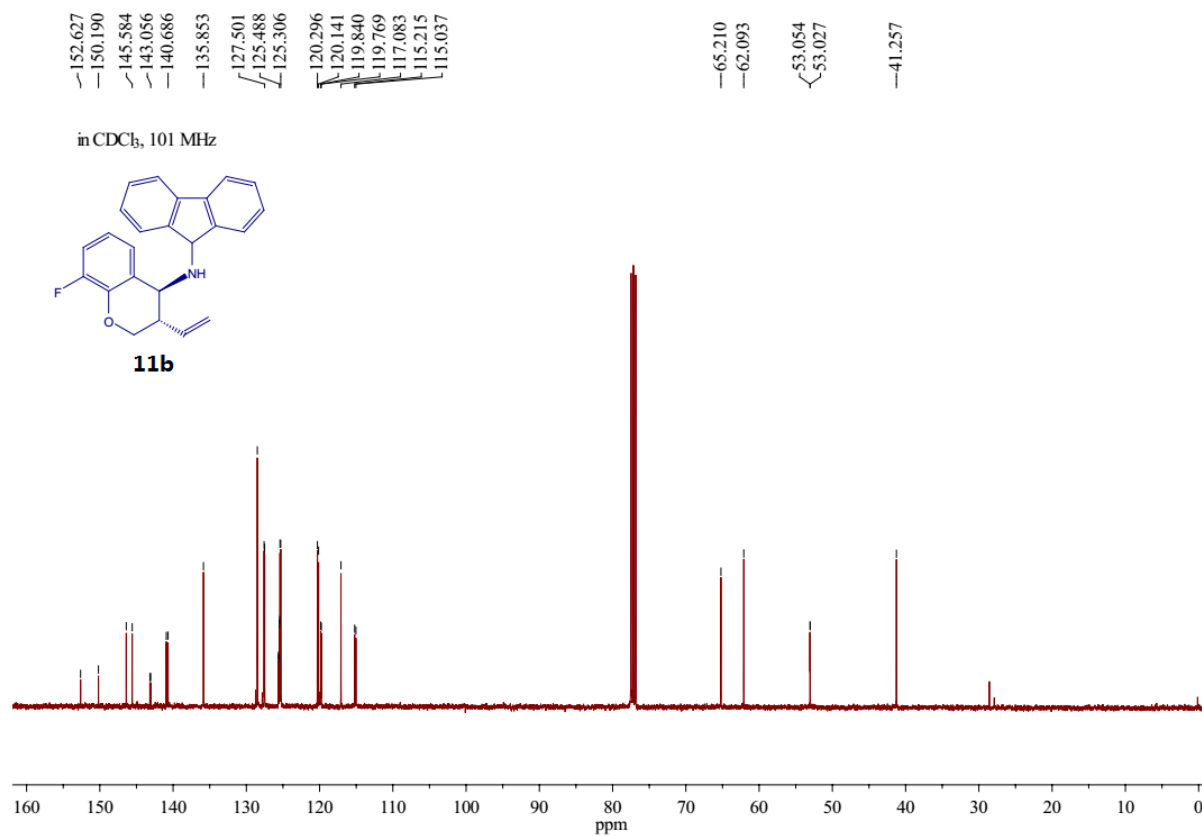

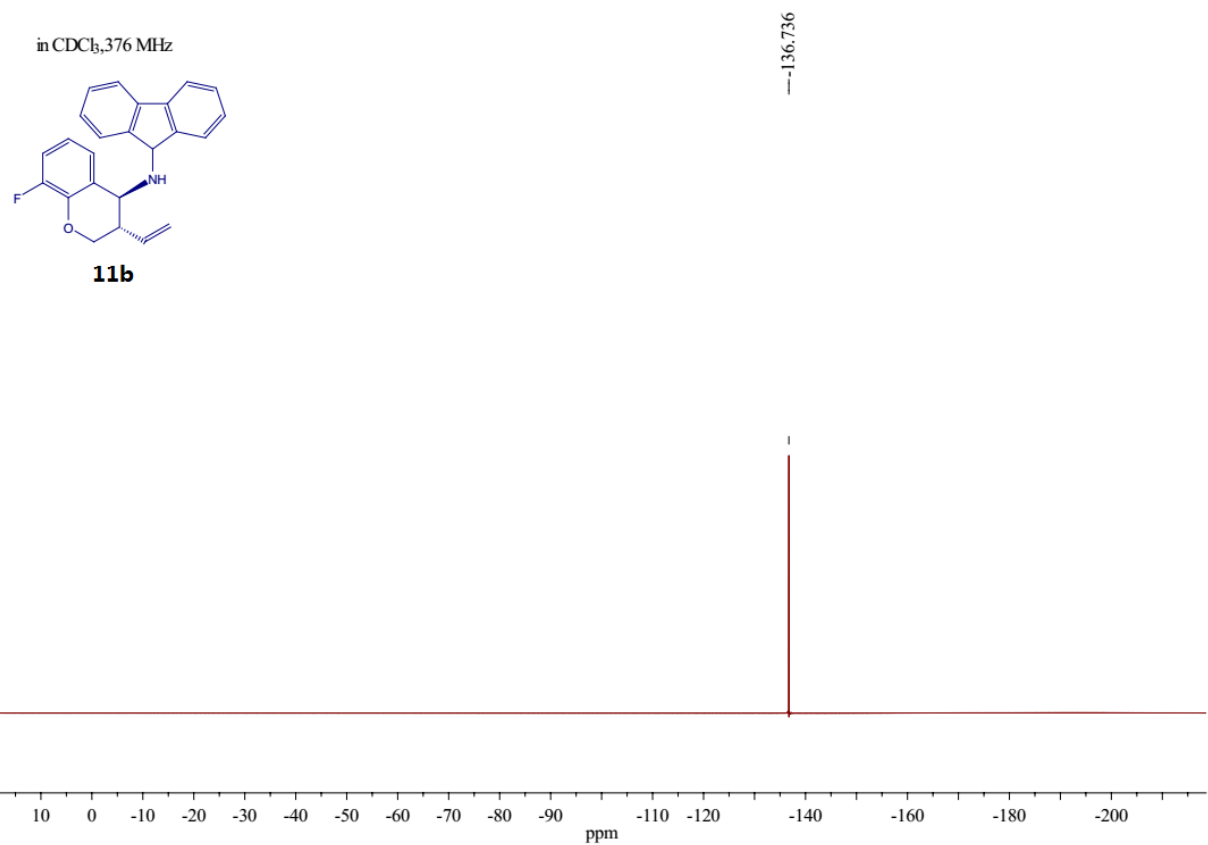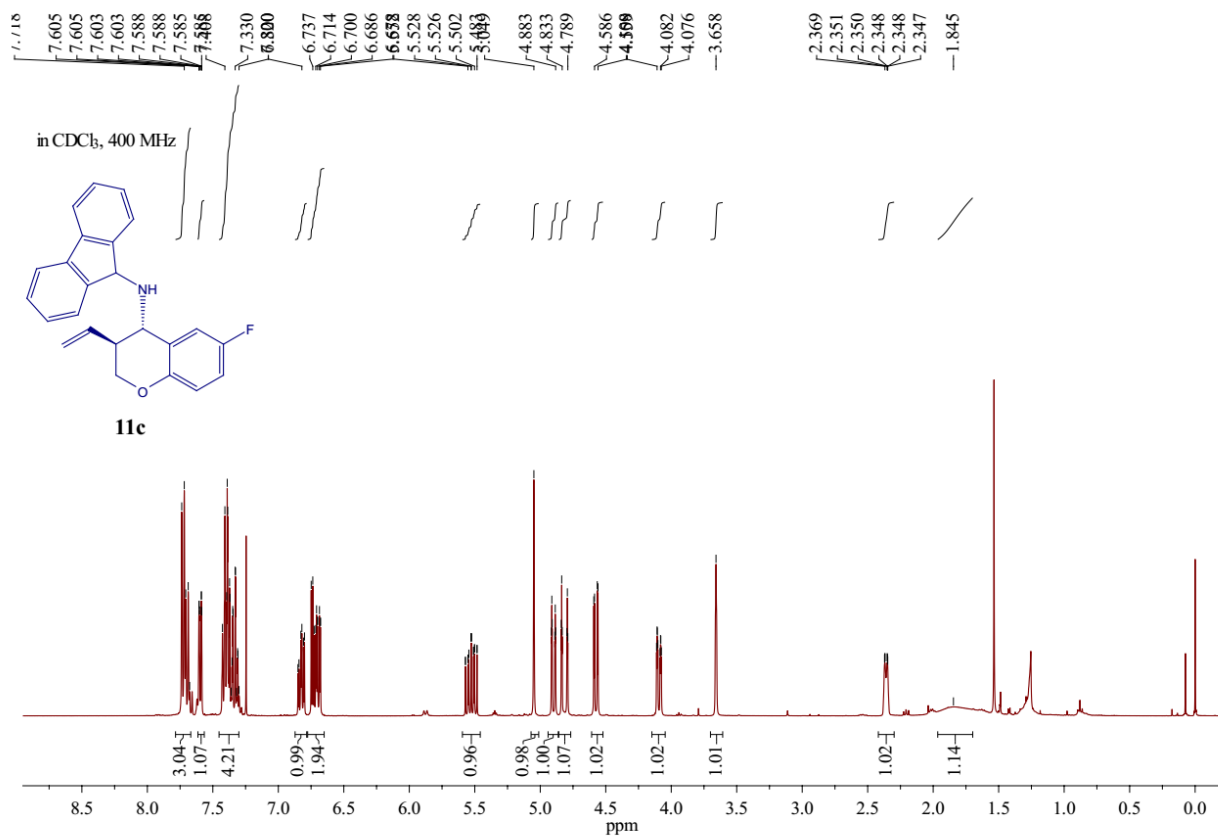

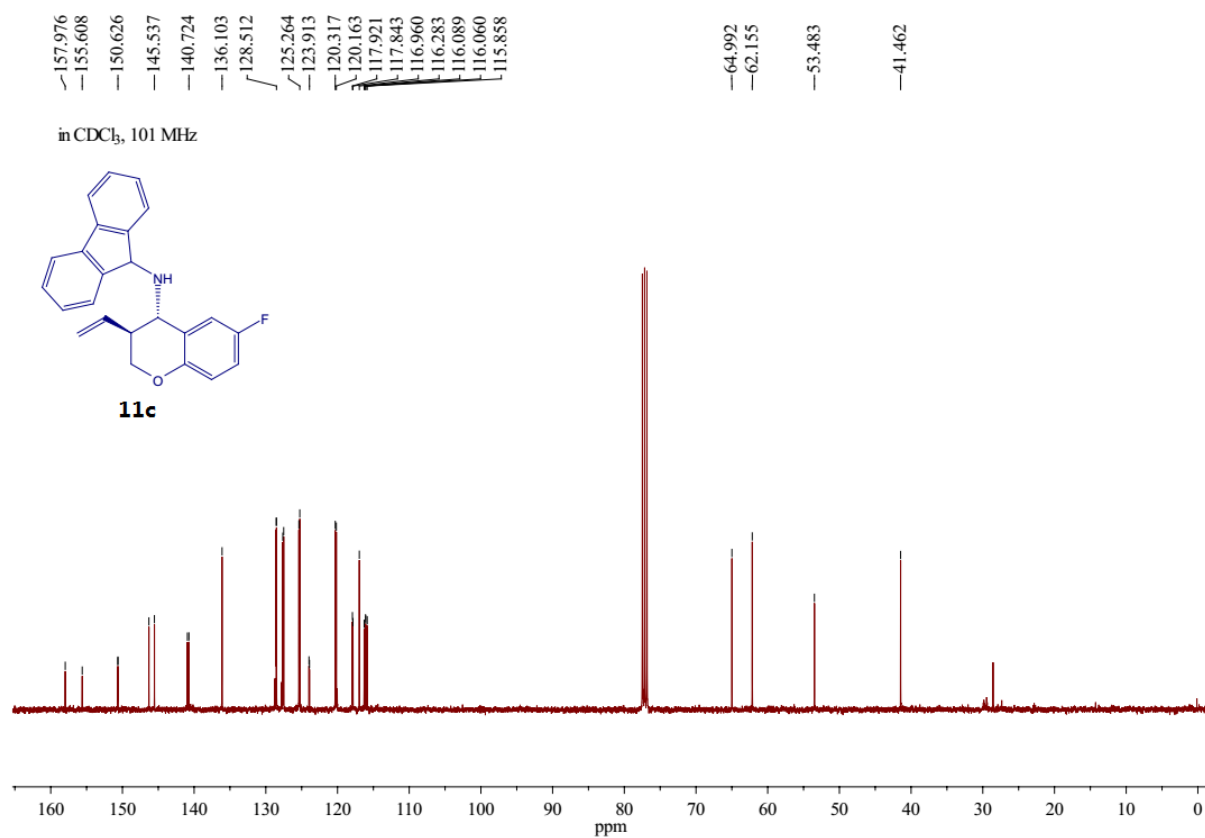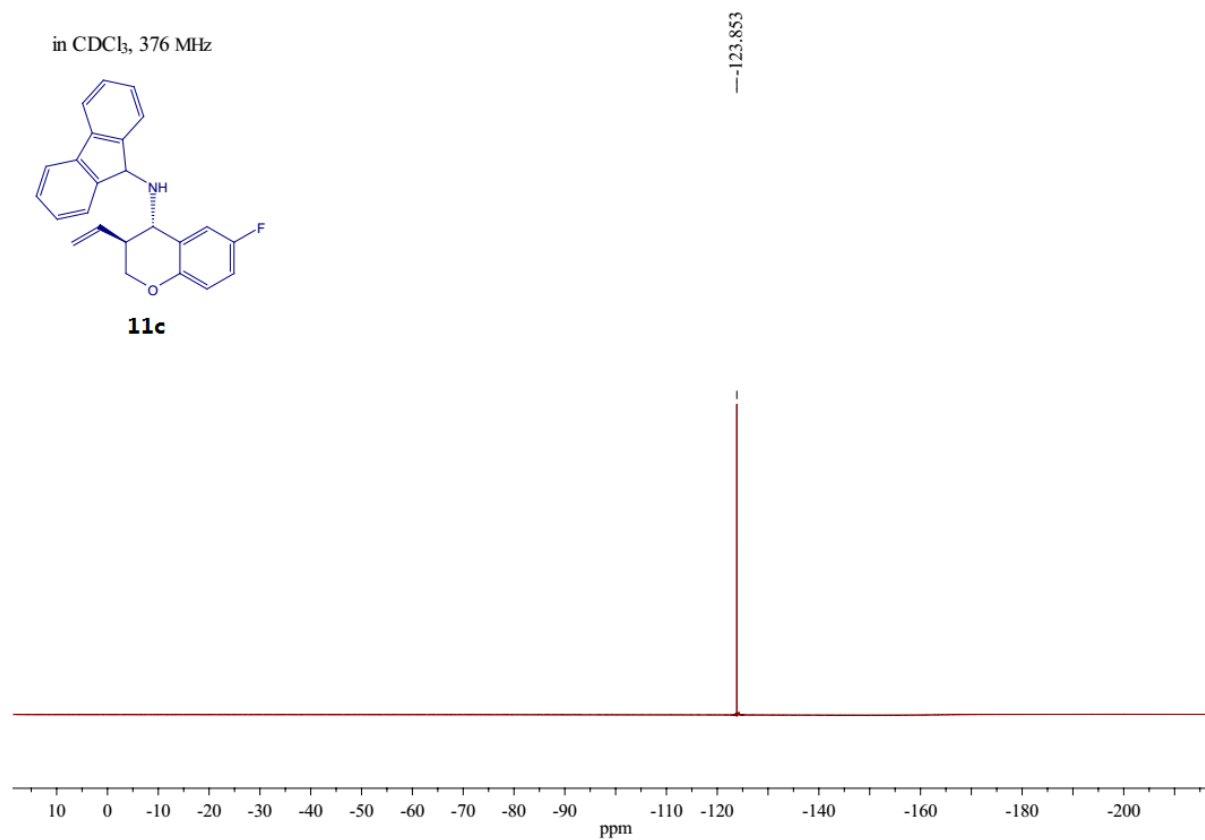

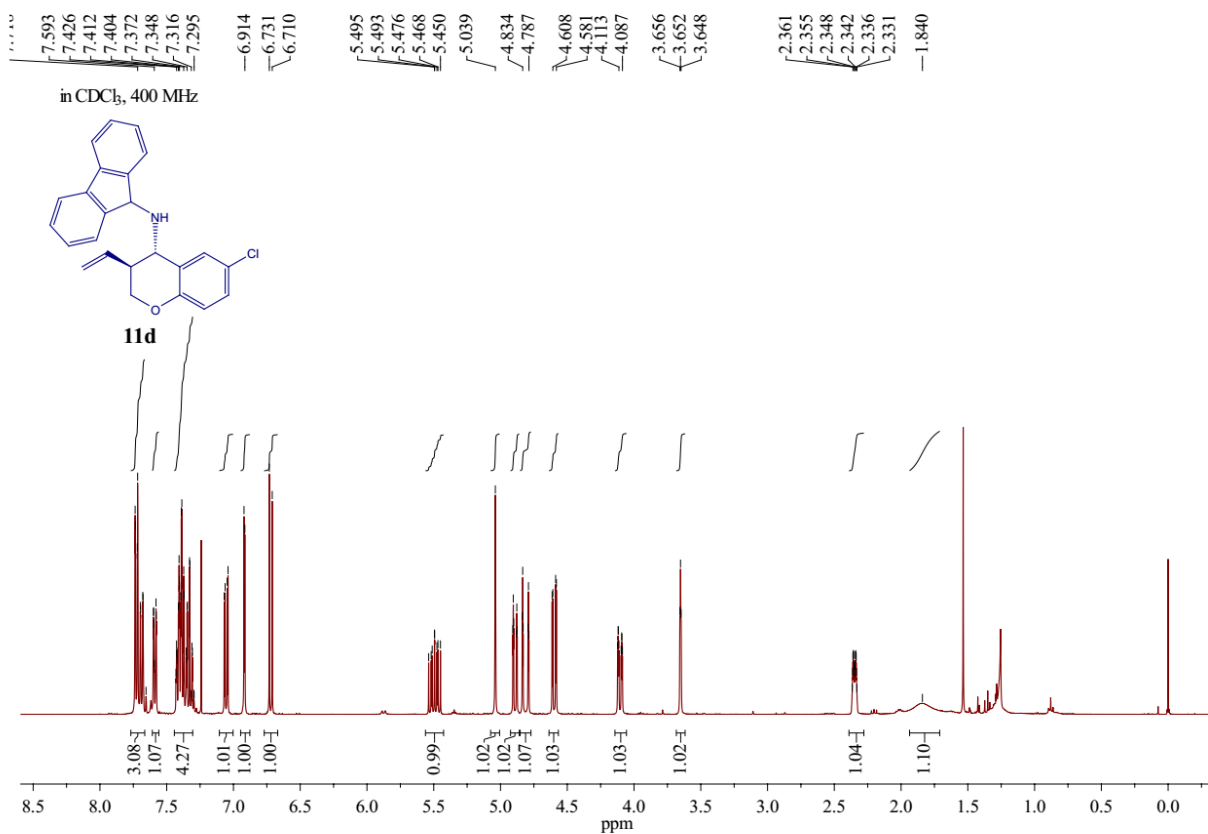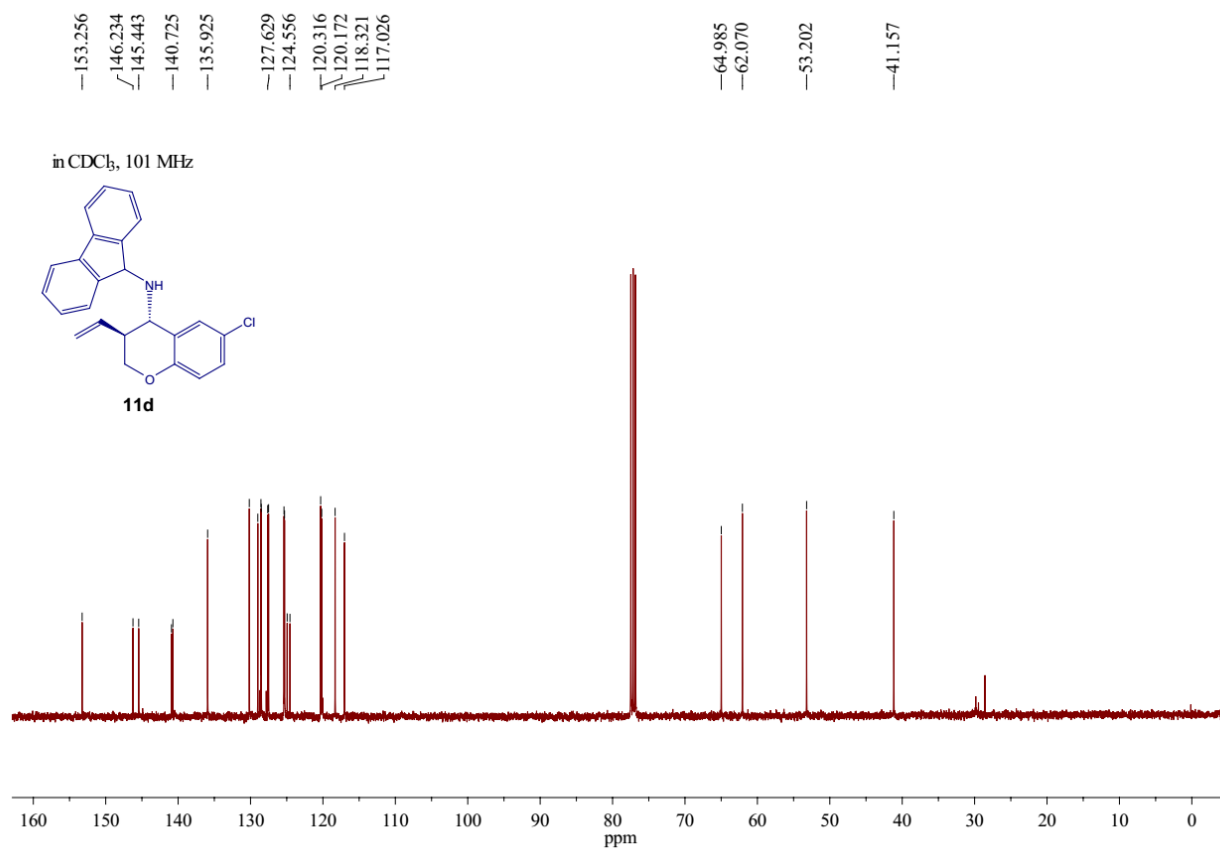

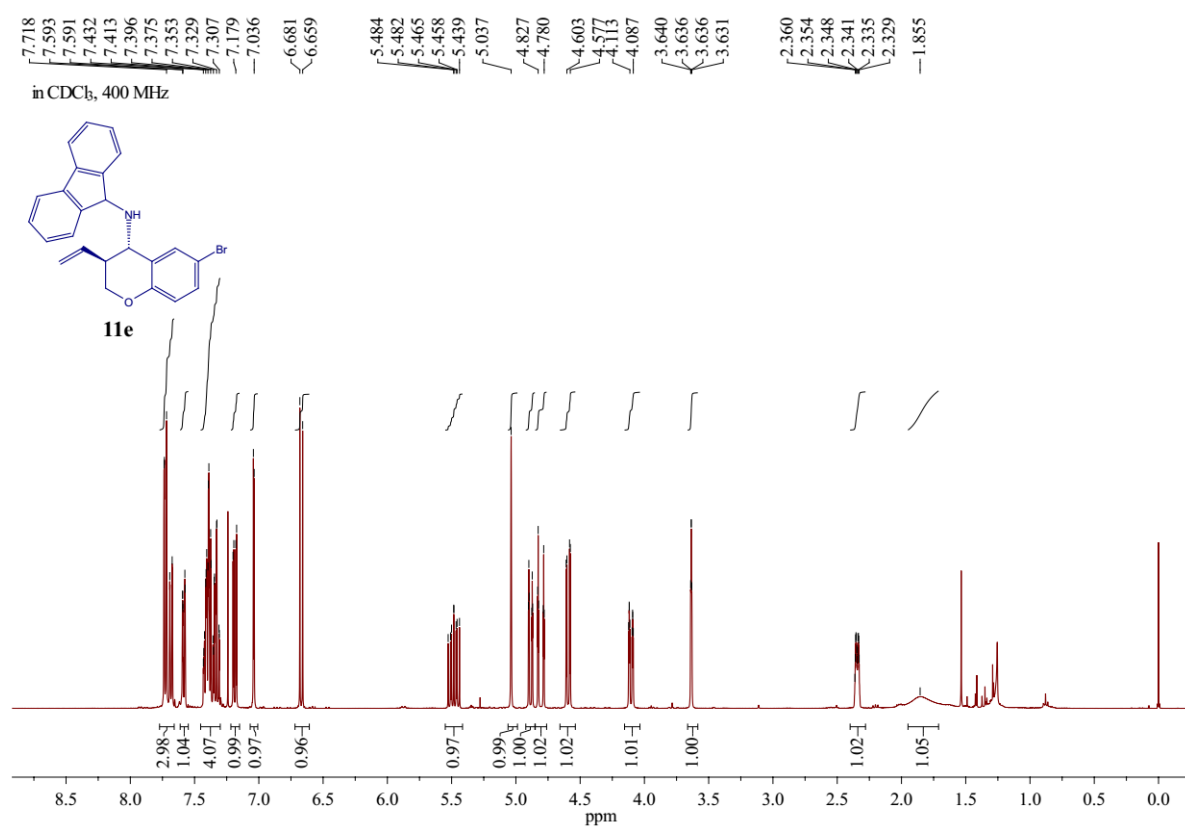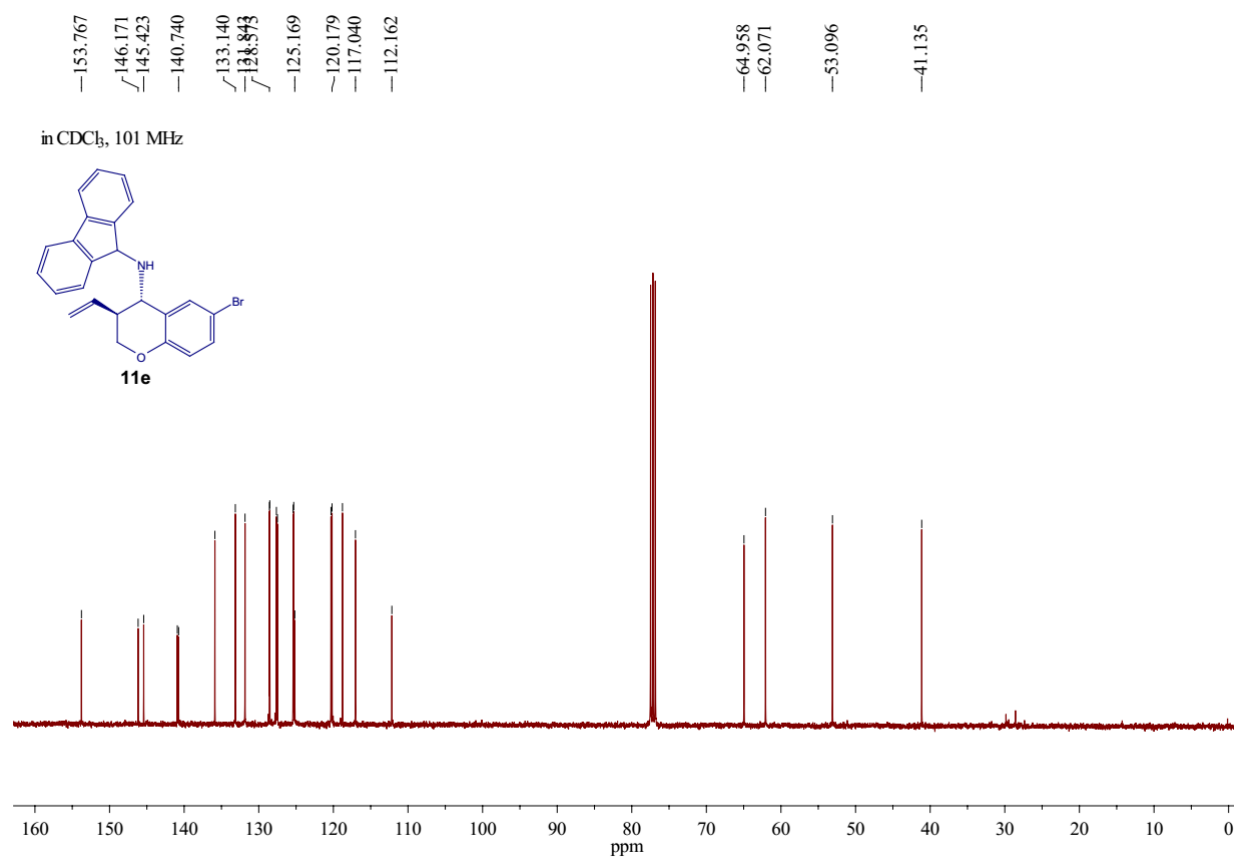

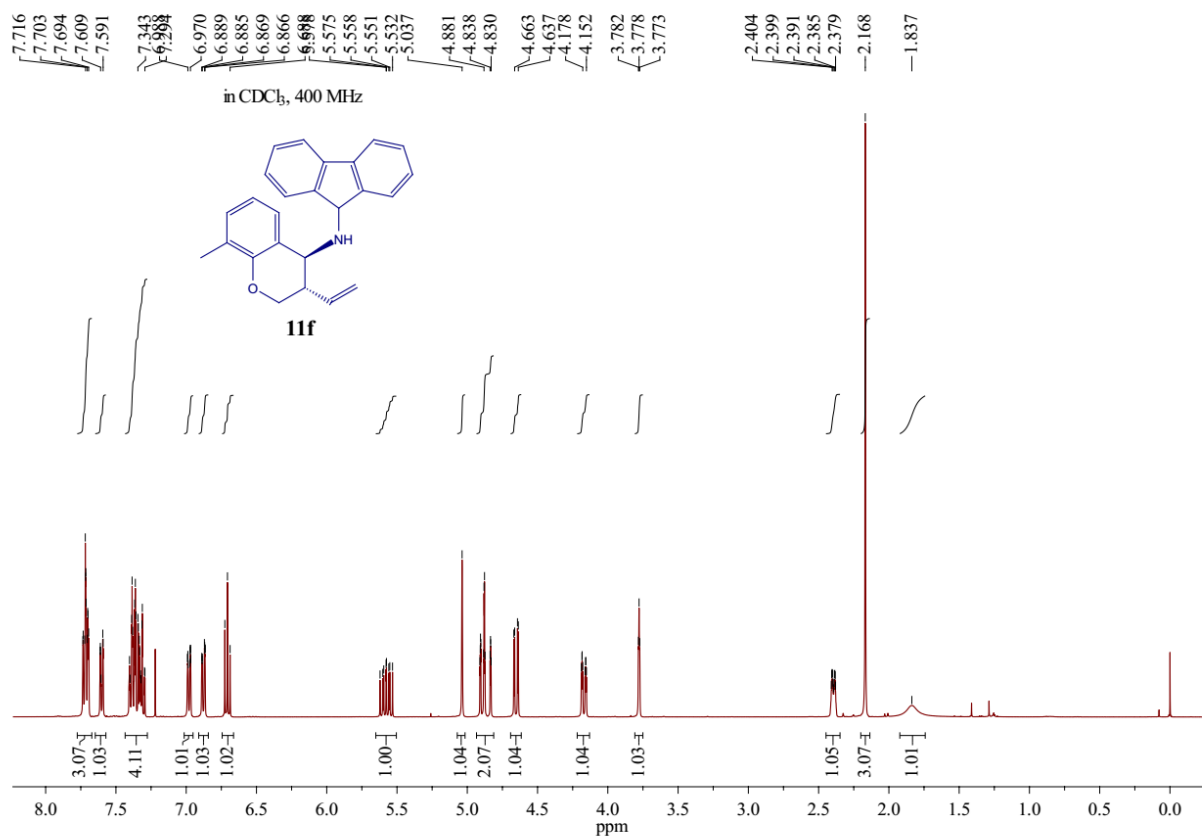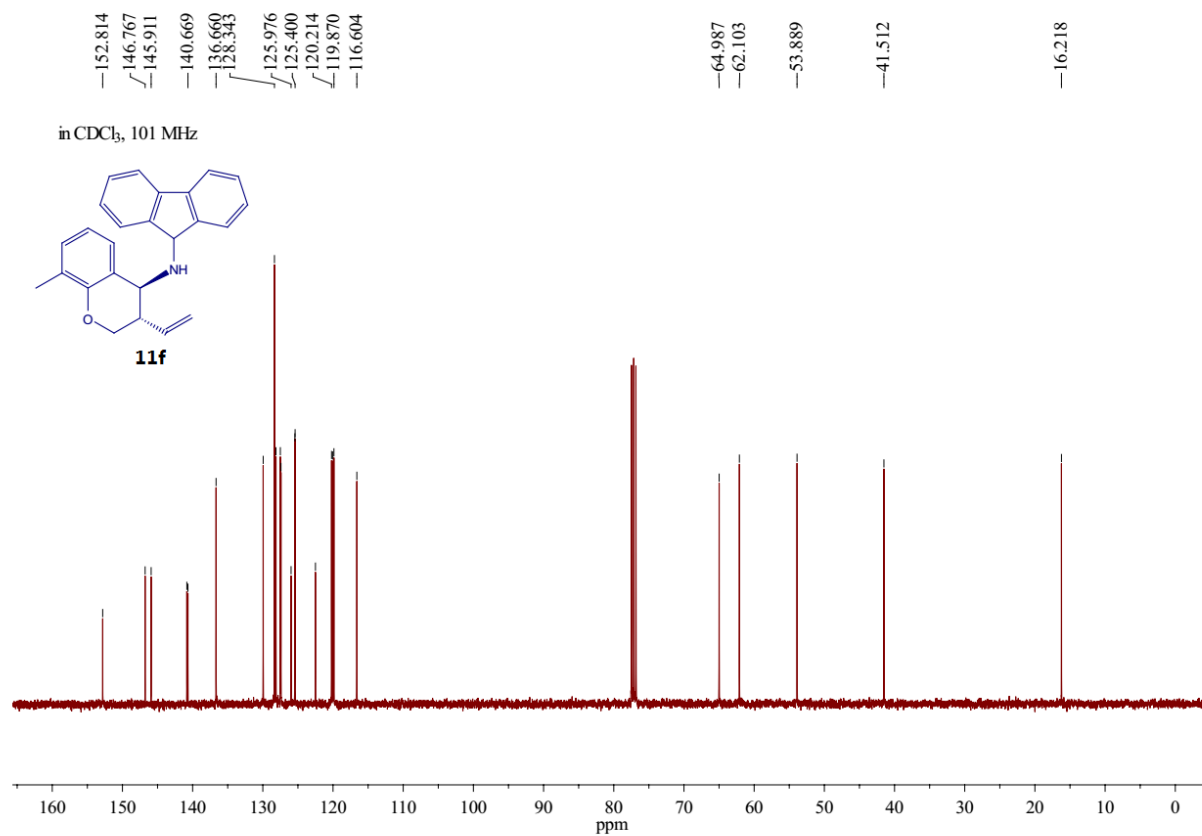

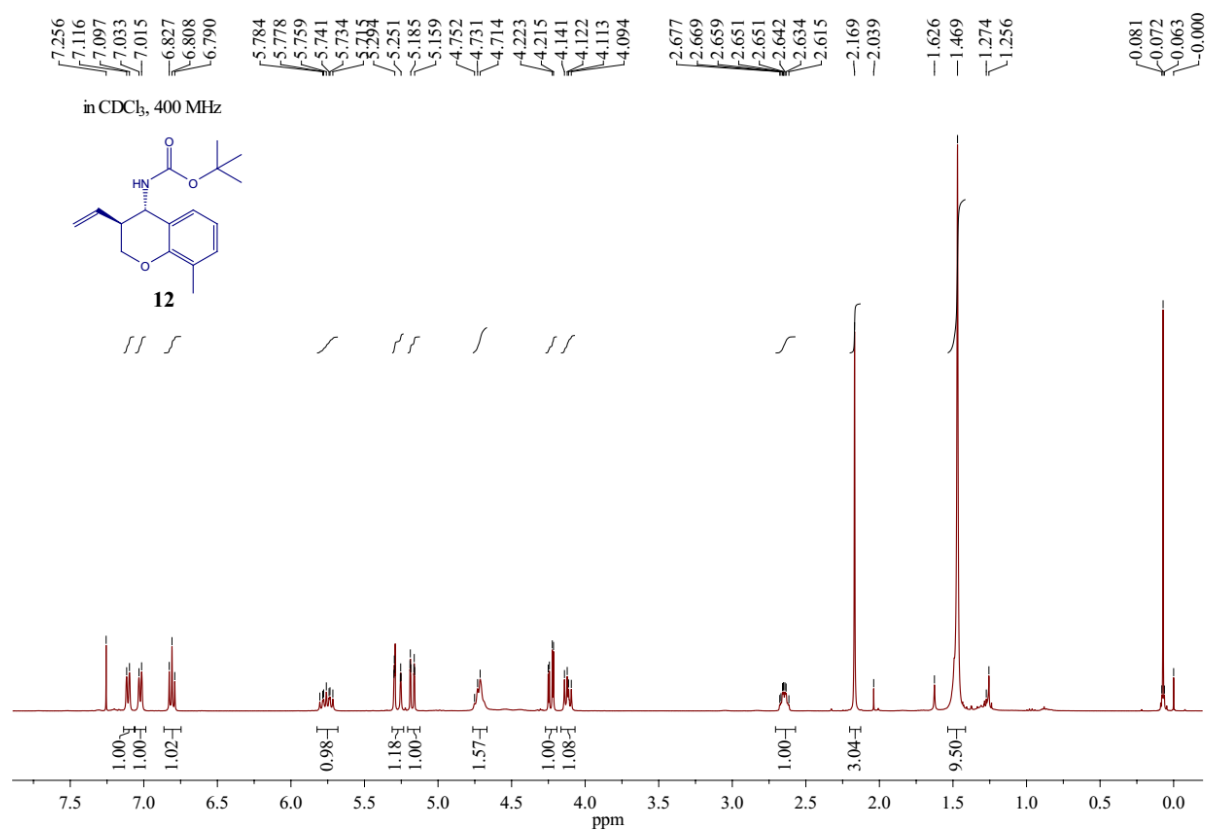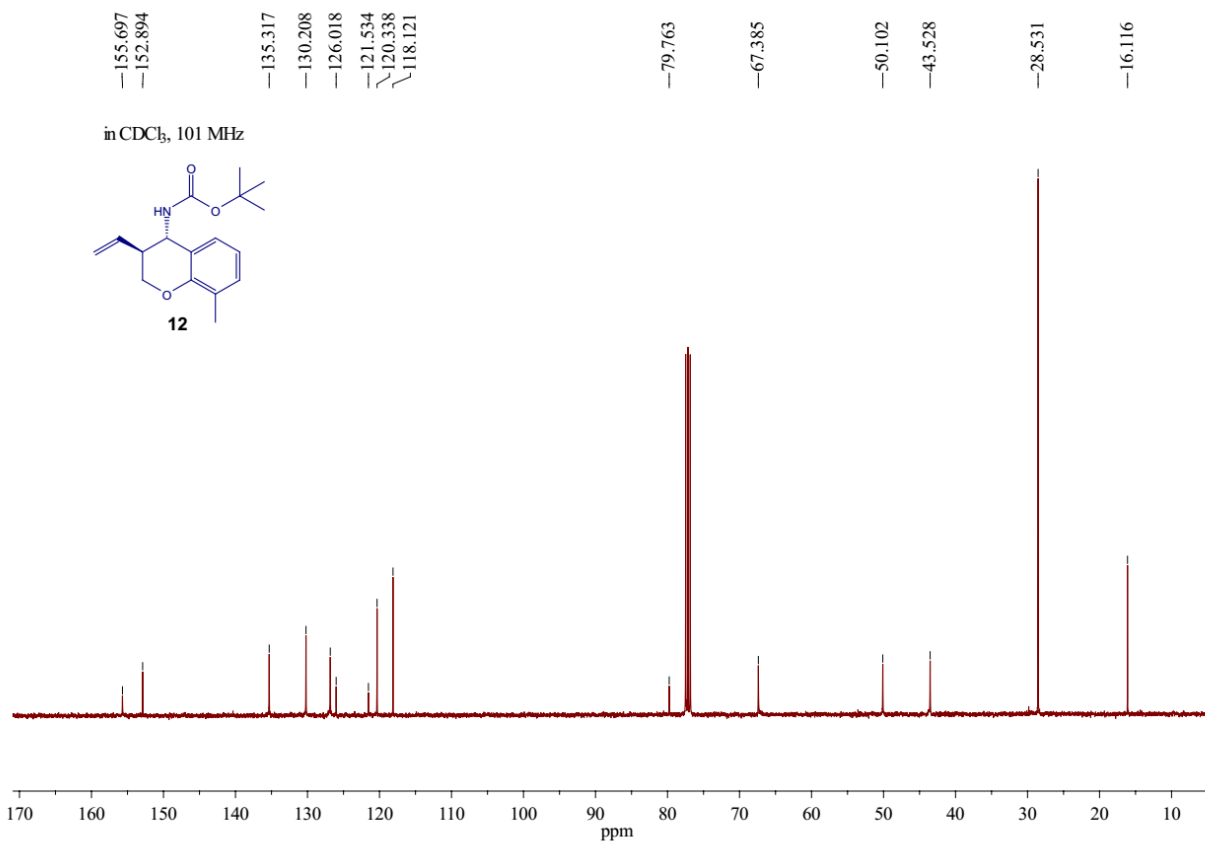



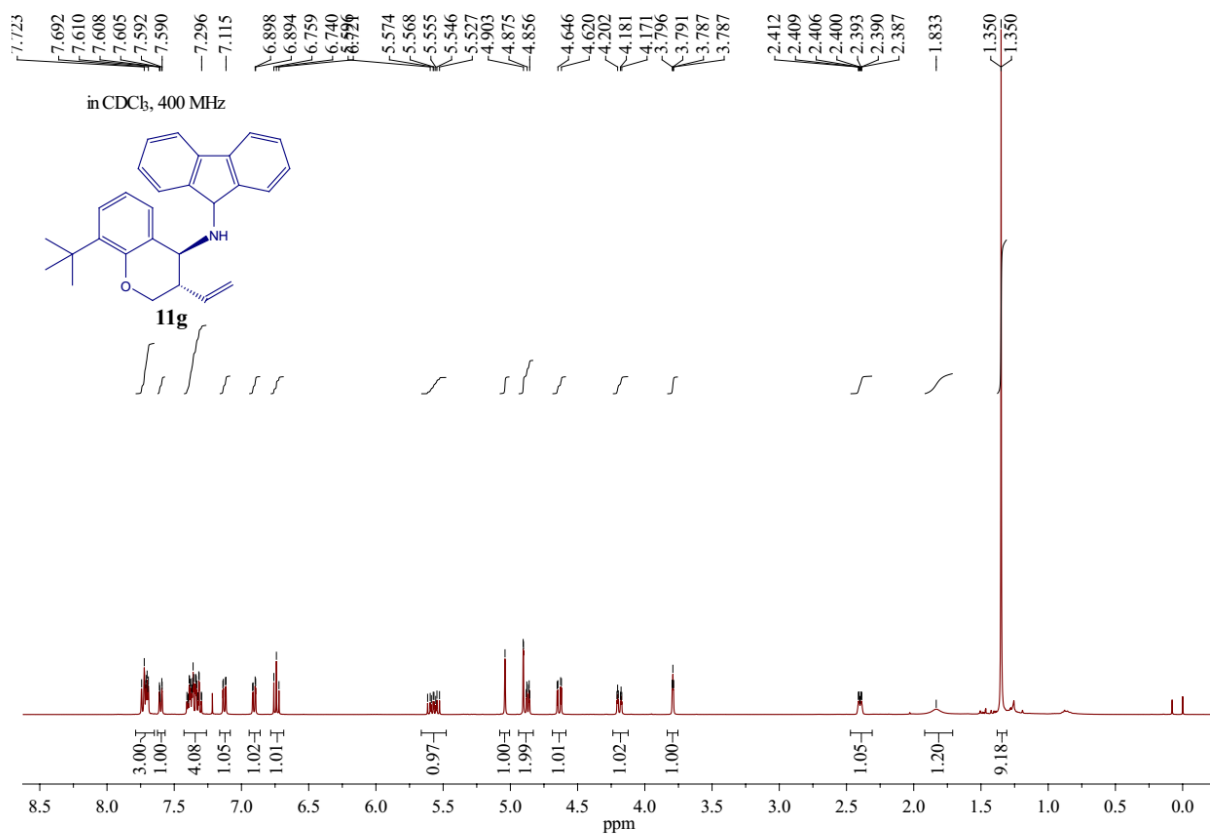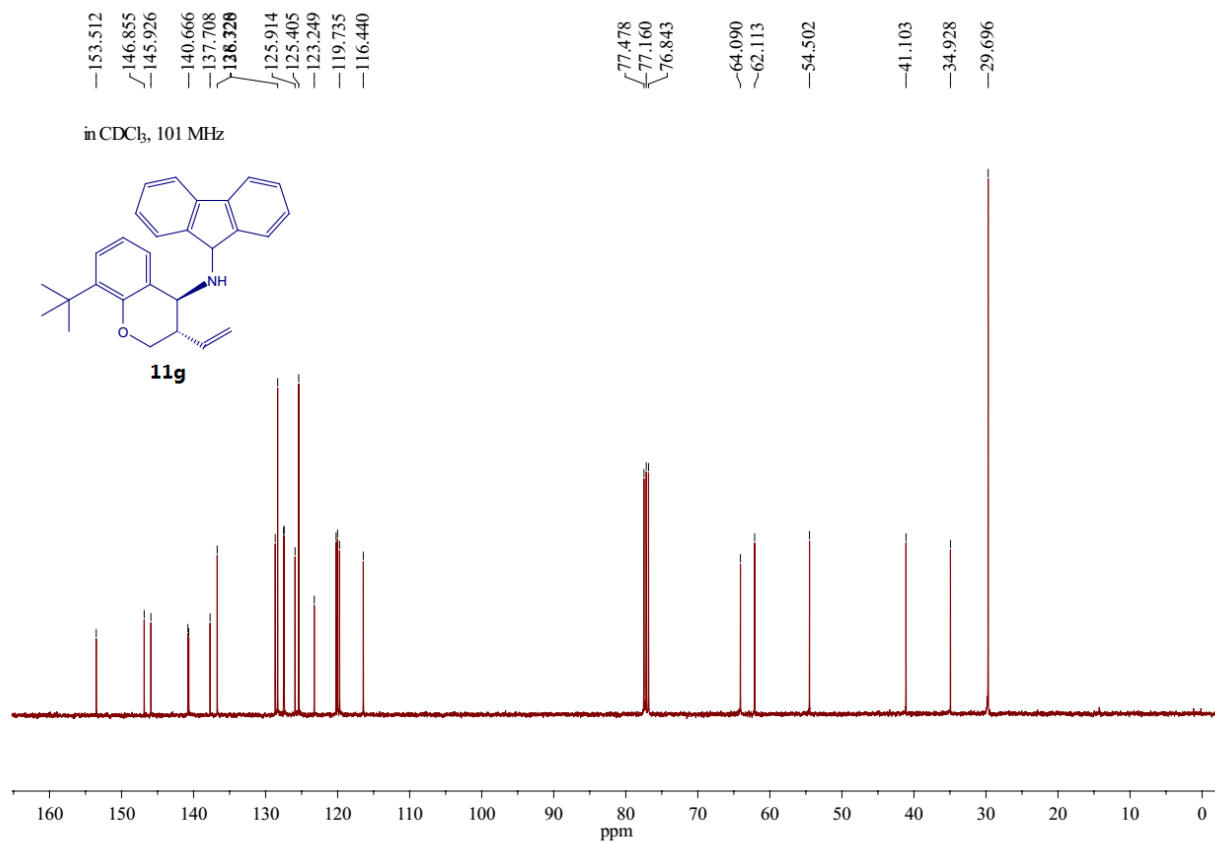

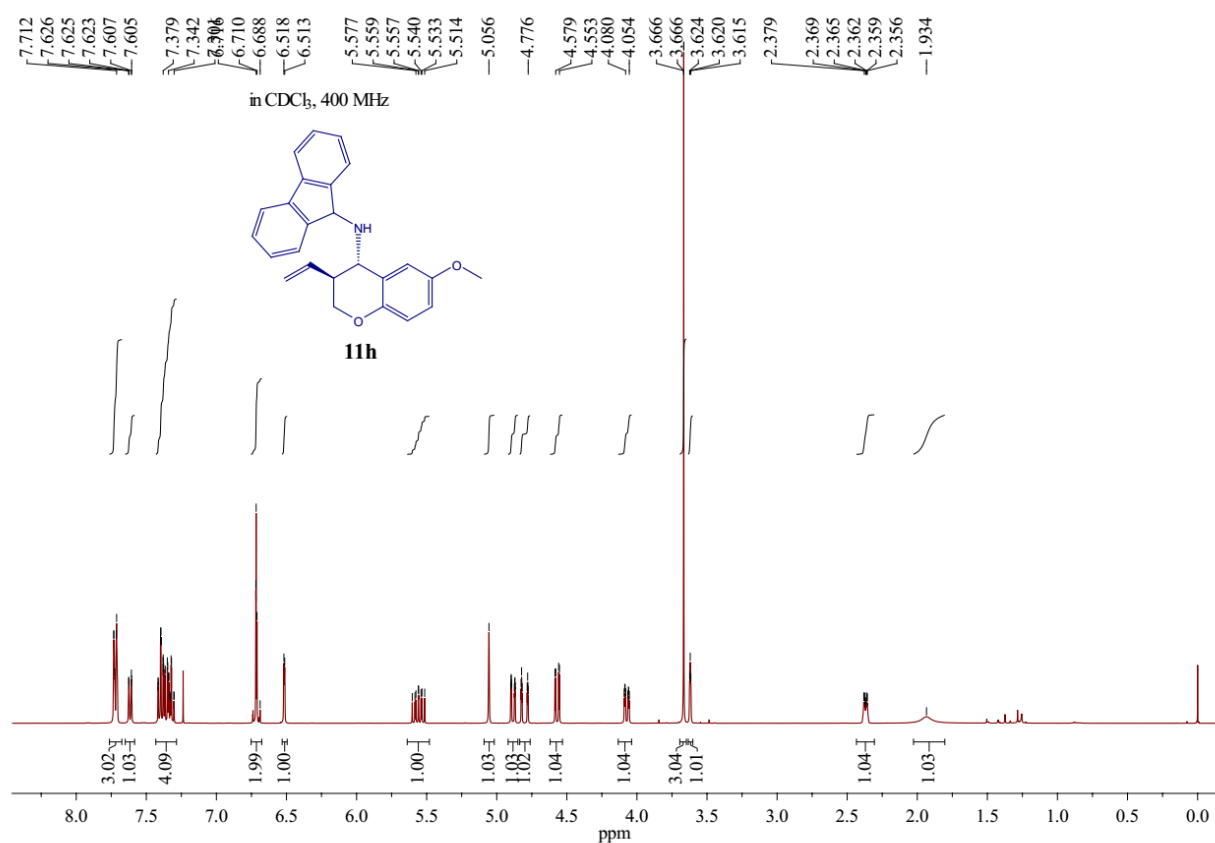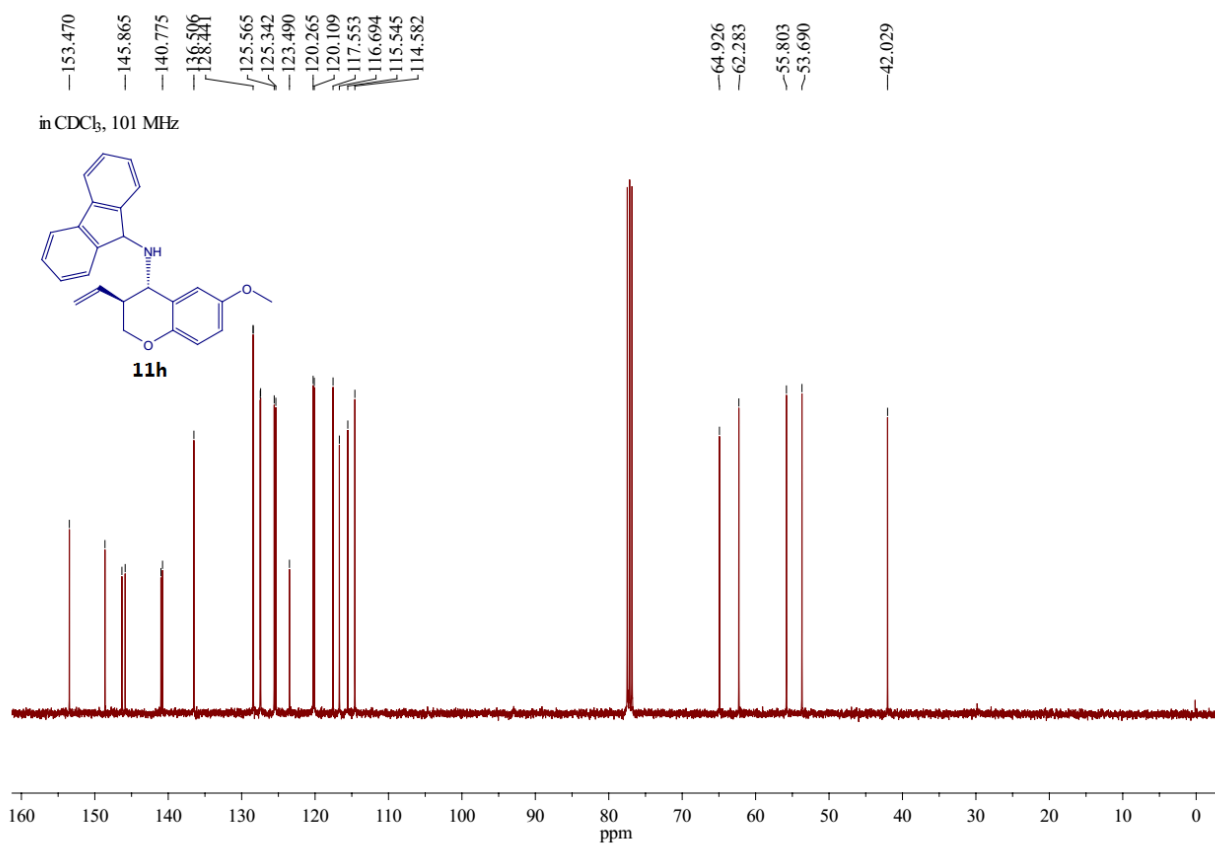

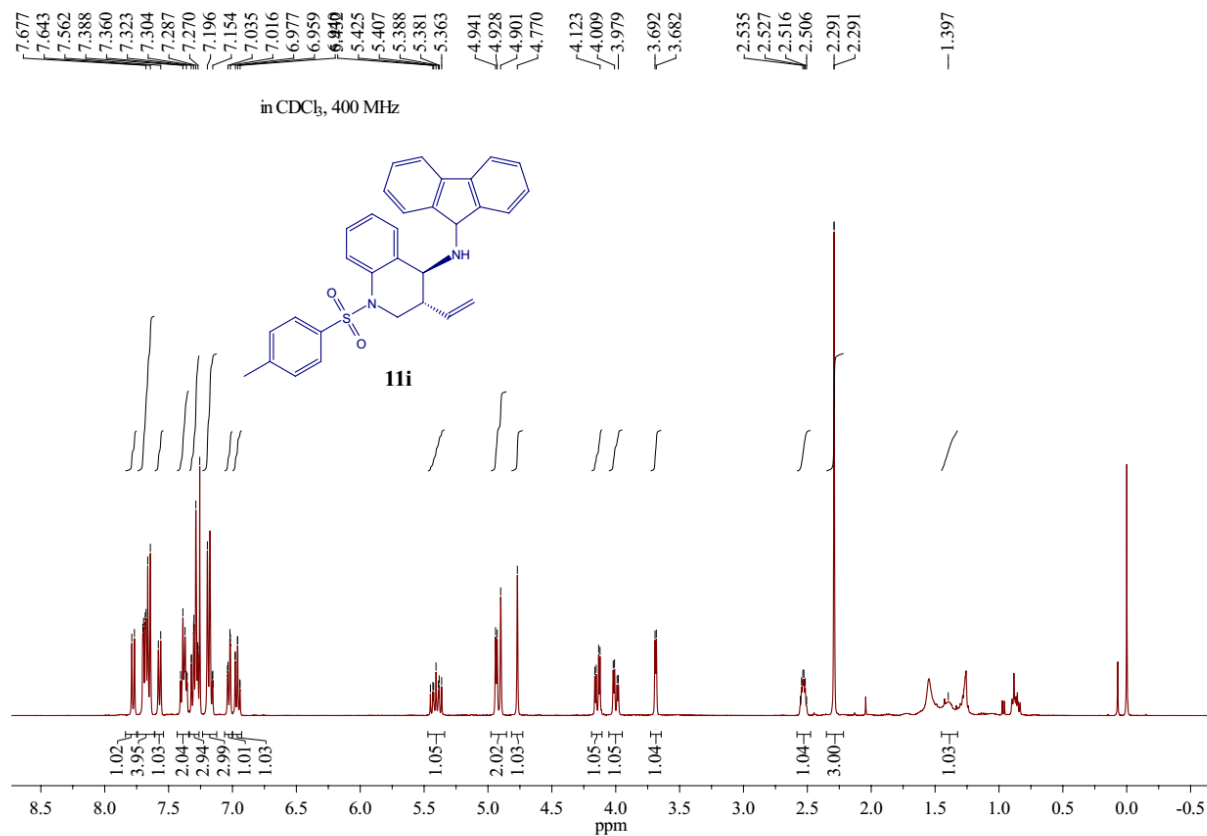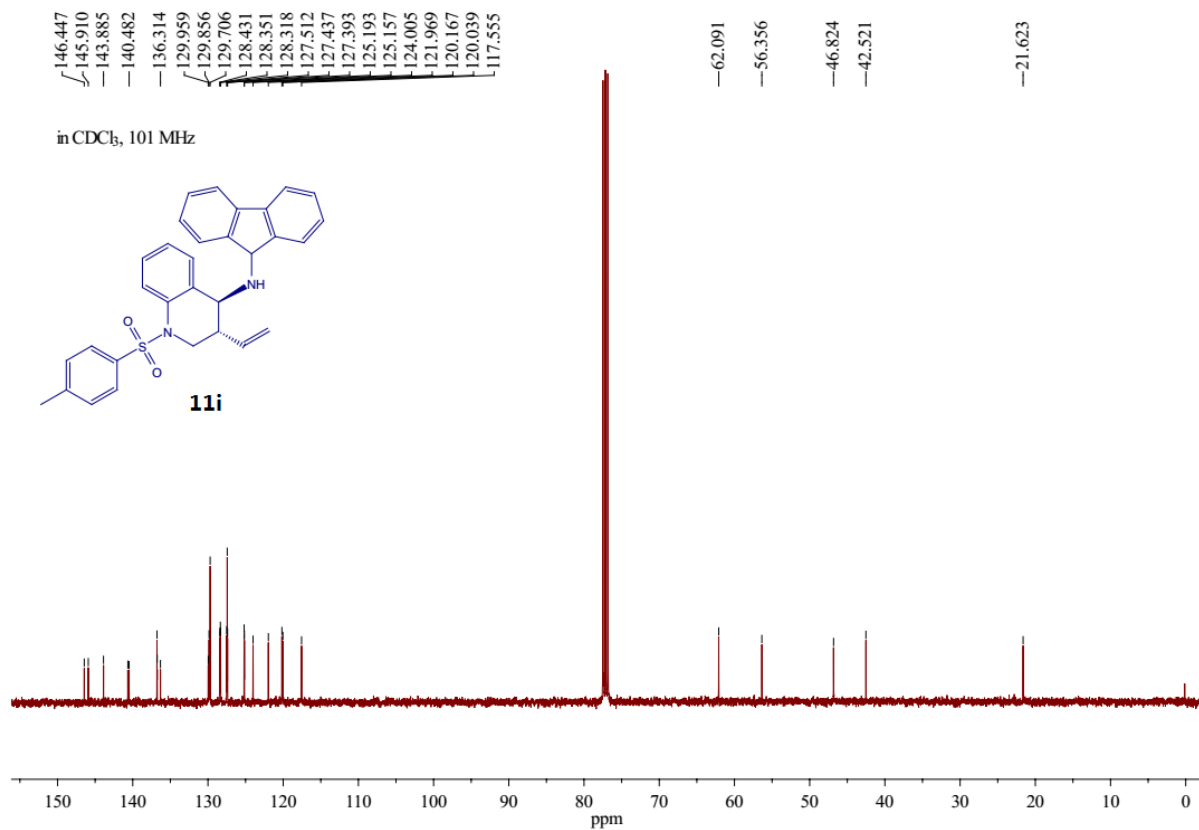

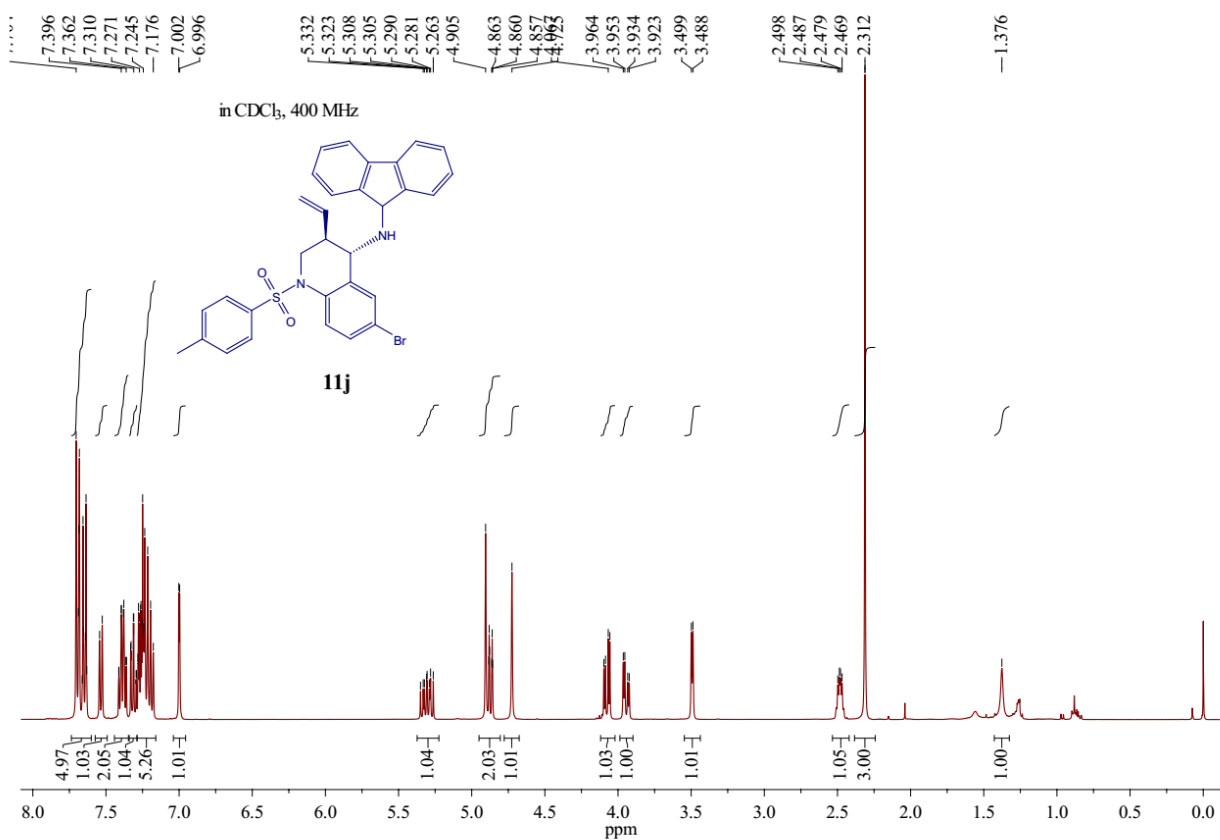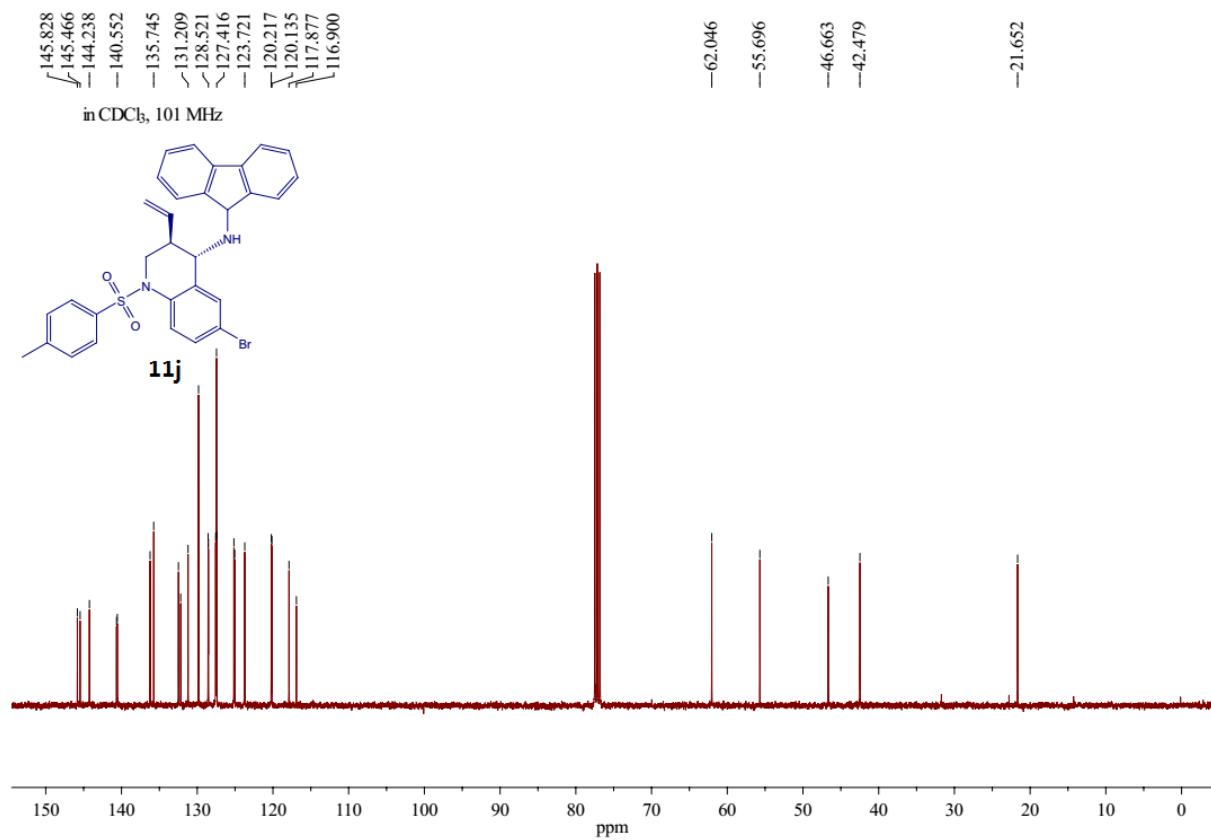

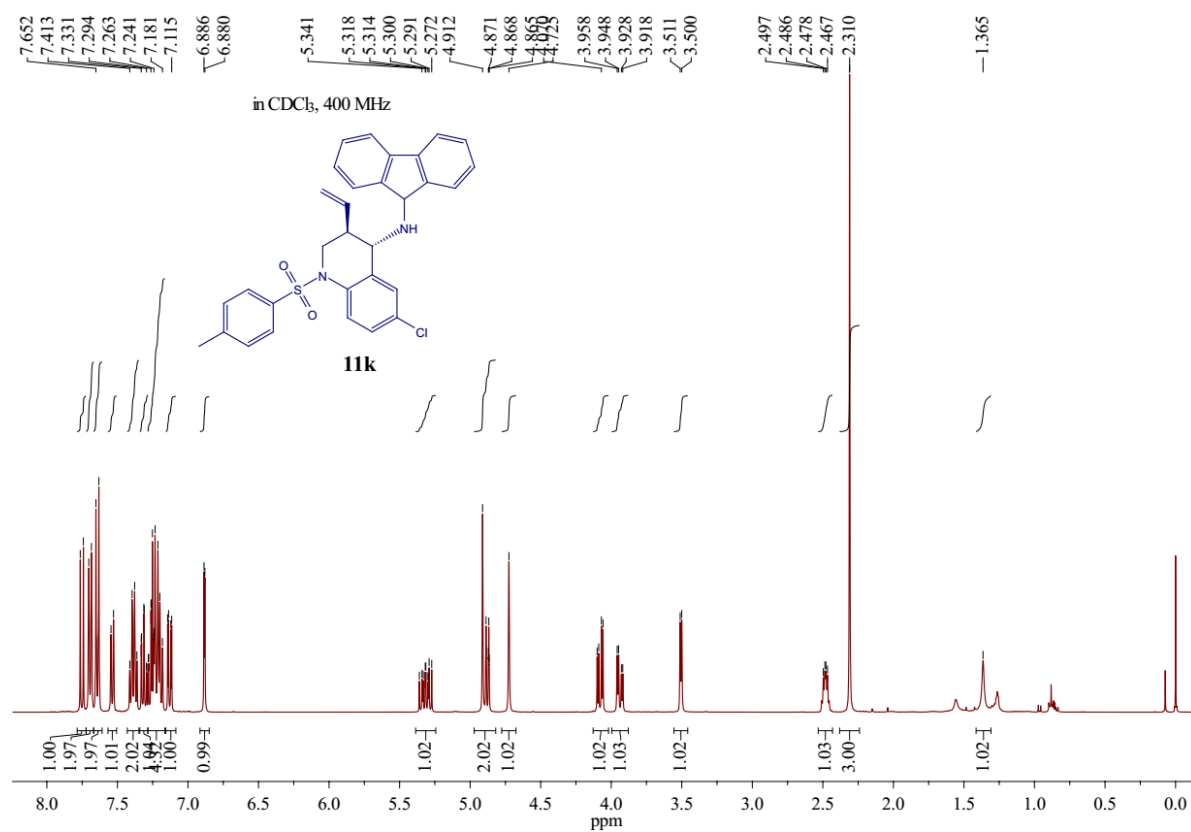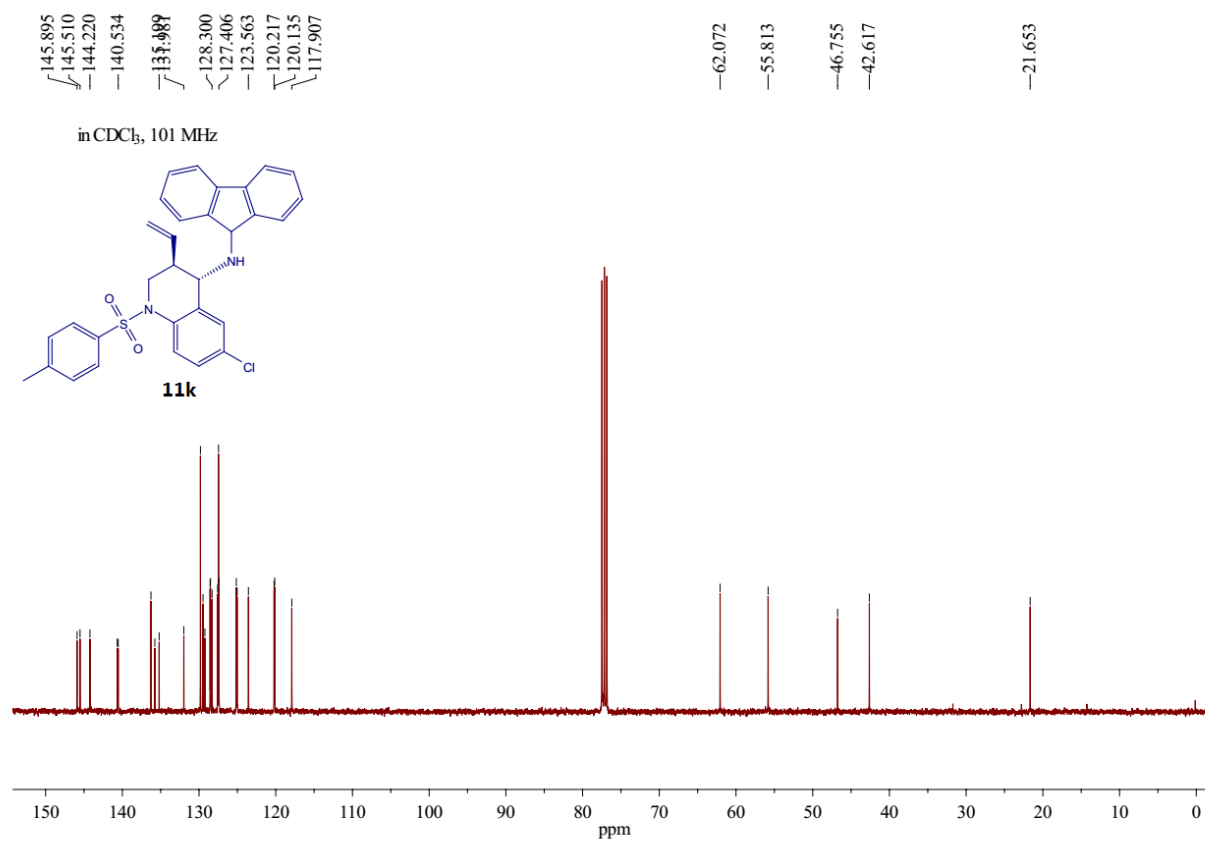

## References

1. (a) Y. Zhu and S. L. Buchwald, *J. Am. Chem. Soc.*, 2014, **136**, 4500-4503; (b) J. Liu, C.-G. Cao, H.-B. Sun, X. Zhang and D. Niu, *J. Am. Chem. Soc.*, 2016, **138**, 13103-13106.
2. (a) Y.-T. Lee, Y.-J. Jang, S.-e. Syu, S.-C. Chou, C.-J. Lee and W. Lin, *Chem. Commun.*, 2012, **48**, 8135-8137; (b) Z. Gao, C. Wang, C. Yuan, L. Zhou, Y. Xiao and H. Guo, *Chem. Commun.*, 2015, **51**, 12653-12656.
